# Supplementary material for: RNA components of the spliceosome regulate tissue- and cancer-specific alternative splicing
Source: Genome Res. 2019 Oct;29(10):1591–604. doi: 10.1101/gr.246678.118 (PMC6771400; doi:10.1101/gr.246678.118)
Supplement: Supplemental Material [file supp_gr.246678.118_Supplemental_Table_S1.xlsx]

## Sheet: deltaPsi_result_table_mRNAseq
Delta PSI values compared to scrambled control oligo for snRNA knockdown within each cell line.
"-": Splicing events that were either not detected or not statistically significant.
splicing_category	gene_ID	gene_HGNC	event_location	MCF7.U1	MCF7.U2	MCF7.U4	MCF7.U6	HeLa.U1	HeLa.U2	HeLa.U4	HeLa.U6
Alternative 3' splice site	ENSG00000137996	RTCA	1:100732180:100733630:+	-	-	-	-	-	-	-0.18	-0.26
Alternative 3' splice site	ENSG00000137996	RTCA	1:100732180:100733630:+	-	-	-	-	-0.17	-	-0.25	-0.32
Alternative 3' splice site	ENSG00000117543	DPH5	1:101467143:101487197:-	-	-	-	-	-	-	-	-0.34
Alternative 3' splice site	ENSG00000131591	C1orf159	1:1026754:1026852:-	-	-	-	-	-	-	-	-0.13
Alternative 3' splice site	ENSG00000185946	RNPC3	1:104094414:104095896:+	0.2	-	-	-	-	-	-	-
Alternative 3' splice site	ENSG00000121940	CLCC1	1:109486679:109490233:-	-	-	-0.19	-	-	-	-	-
Alternative 3' splice site	ENSG00000134222	PSRC1	1:109823591:109823730:-	-0.43	-	-	-	0.22	0.27	-	0.19
Alternative 3' splice site	ENSG00000134222	PSRC1	1:109825411:109825696:-	-	-	-	-	-	0.37	-	-
Alternative 3' splice site	ENSG00000143106	PSMA5	1:109952715:109953633:-	-	-	-	-	-	0.11	-	-
Alternative 3' splice site	ENSG00000168710	AHCYL1	1:110561272:110561497:+	-	0.14	-	-	-0.22	-	-0.25	-0.27
Alternative 3' splice site	ENSG00000155363	MOV10	1:113241411:113242080:+	-	0.14	-	-	-	-	0.11	-
Alternative 3' splice site	ENSG00000116793	PHTF1	1:114301470:114301645:-	0.16	-	-	-	0.37	0.34	0.17	-
Alternative 3' splice site	ENSG00000078808	SDF4	1:1153184:1153838:-	-	-	-	-	-	0.15	-	-
Alternative 3' splice site	ENSG00000169972	PUSL1	1:1244983:1245061:+	-	-	-	-	-	0.14	0.1	-
Alternative 3' splice site	ENSG00000127054	CPSF3L	1:1255223:1255836:-	-	-	0.19	0.26	-	-	0.14	-
Alternative 3' splice site	ENSG00000127054	CPSF3L	1:1256062:1256376:-	-	-	0.16	0.43	-	0.17	0.22	-
Alternative 3' splice site	ENSG00000221978	CCNL2	1:1326955:1328059:-	-	-	-	-	0.38	-	-	-
Alternative 3' splice site	ENSG00000221978	CCNL2	1:1328183:1328776:-	-	-	-	-	-	-	-	0.15
Alternative 3' splice site	ENSG00000221978	CCNL2	1:1330917:1333613:-	-	-	-	-	-	0.26	0.32	-
Alternative 3' splice site	ENSG00000224870	RP4-758J18.2	1:1335065:1335359:+	-	-	0.46	0.39	-	-	-	-
Alternative 3' splice site	ENSG00000168614	NBPF9	1:144822084:144823052:+	-	-	-	-	0.32	-	0.13	-
Alternative 3' splice site	ENSG00000117262	GPR89A	1:145811463:145811896:-	0.77	-	-0.12	-	-0.29	-0.28	-0.3	-0.3
Alternative 3' splice site	ENSG00000117262	GPR89A	1:145811463:145811896:-	0.8	-	-0.12	-	-0.28	-0.29	-0.29	-0.29
Alternative 3' splice site	ENSG00000243452	NBPF15	1:148561115:148566782:+	-	-	0.2	-0.22	-	-	-	-
Alternative 3' splice site	ENSG00000143401	ANP32E	1:150195620:150198940:-	-	-	-	-	-	0.15	-	-
Alternative 3' splice site	ENSG00000117362	APH1A	1:150240527:150241098:-	-	-	-	-	-	-0.18	-	-
Alternative 3' splice site	ENSG00000159208	C1orf51	1:150255028:150255618:+	-	-	-	0.65	-	-	-	-
Alternative 3' splice site	ENSG00000143418	CERS2	1:150941607:150947095:-	-	0.16	-	-	-	0.25	-	-
Alternative 3' splice site	ENSG00000143409	FAM63A	1:150975444:150978788:-	-	-	-	-	0.23	-	-	0.28
Alternative 3' splice site	ENSG00000143363	PRUNE	1:150990380:150990943:+	-	0.16	-	-	-	-	-	-
Alternative 3' splice site	ENSG00000143416	SELENBP1	1:151342454:151345114:-	-	-	-	-	-	0.12	-	-
Alternative 3' splice site	ENSG00000143416	SELENBP1	1:151342454:151345114:-	-	-	-	-	-	0.12	-	-
Alternative 3' splice site	ENSG00000160741	CRTC2	1:153925126:153925281:-	-	0.13	0.15	-	-	-	-	-
Alternative 3' splice site	ENSG00000163348	PYGO2	1:154933588:154933950:-	-	-	0.11	-	-	-	-	-
Alternative 3' splice site	ENSG00000160691	SHC1	1:154939020:154940147:-	-	-	-	0.13	-	-	-	-
Alternative 3' splice site	ENSG00000169241	SLC50A1	1:155109427:155110037:+	-	-	-	-	-	-	-0.13	-
Alternative 3' splice site	ENSG00000185499	MUC1	1:155160052:155160198:-	-	-	-0.16	-	-	-	-	-
Alternative 3' splice site	ENSG00000185499	MUC1	1:155160761:155161974:-	-	-	-	-	-	-0.12	-	-
Alternative 3' splice site	ENSG00000185499	MUC1	1:155162101:155162577:-	-	0.18	-	-	-	-	-	-
Alternative 3' splice site	ENSG00000185499	MUC1	1:155162101:155162577:-	-	0.18	-	-	-	-	-	-
Alternative 3' splice site	ENSG00000169231	THBS3	1:155168528:155169595:-	-	-	-	-	-	0.13	-	-
Alternative 3' splice site	ENSG00000160766	GBAP1	1:155185191:155185354:-	-	-	-	-	0.22	-	-	-
Alternative 3' splice site	ENSG00000160752	FDPS	1:155278756:155279834:+	0.11	0.12	-	-	-	-	-	-
Alternative 3' splice site	ENSG00000125459	MSTO1	1:155580123:155580185:+	-	-	-	-	0.14	0.4	0.22	-
Alternative 3' splice site	ENSG00000125459	MSTO1	1:155581082:155581202:+	-	-	-	-	-	0.14	0.3	-
Alternative 3' splice site	ENSG00000125459	MSTO1	1:155581082:155581218:+	-	0.11	0.33	0.22	-	0.17	0.22	-
Alternative 3' splice site	ENSG00000125459	MSTO1	1:155581618:155581712:+	-	-	0.16	-	-	-	-	-
Alternative 3' splice site	ENSG00000125459	MSTO1	1:155582361:155582597:+	-	0.2	-	-	-	0.13	-	-
Alternative 3' splice site	ENSG00000125459	MSTO1	1:155583024:155583216:+	-	0.2	-	0.17	-	-	-	-
Alternative 3' splice site	ENSG00000132680	KIAA0907	1:155886528:155887290:-	-	-	0.15	0.14	-	-	0.13	0.16
Alternative 3' splice site	ENSG00000160785	SLC25A44	1:156170263:156177653:+	-	-	-	0.2	-	-	-	-
Alternative 3' splice site	ENSG00000160785	SLC25A44	1:156170263:156177653:+	-	-	-	0.17	-	-	-	-
Alternative 3' splice site	ENSG00000160818	GPATCH4	1:156566040:156566179:-	-	-	-	-	-	-	0.18	-
Alternative 3' splice site	ENSG00000215845	TSTD1	1:161008484:161008670:-	-	-	-	0.18	-	-	-	-
Alternative 3' splice site	ENSG00000158850	B4GALT3	1:161145885:161146224:-	-	-	0.26	-	-	-0.13	-	0.12
Alternative 3' splice site	ENSG00000081721	DUSP12	1:161719935:161721445:+	-	-	0.29	-	-0.13	-0.16	-	-0.16
Alternative 3' splice site	ENSG00000198929	NOS1AP	1:162257226:162270423:+	-	-	-	-	-	-0.18	-	-0.22
Alternative 3' splice site	ENSG00000116809	ZBTB17	1:16268936:16269024:-	-	0.14	-	-	-	0.16	0.44	-
Alternative 3' splice site	ENSG00000116809	ZBTB17	1:16275060:16299534:-	-	0.22	-	-	-	0.32	-	-
Alternative 3' splice site	ENSG00000132196	HSD17B7	1:162766467:162767592:+	0.19	-	0.2	-	-	-	-	-
Alternative 3' splice site	ENSG00000173641	HSPB7	1:16343717:16344260:-	-	-	-	-	0.13	0.32	-	0.13
Alternative 3' splice site	ENSG00000173641	HSPB7	1:16343717:16344260:-	-	-	-	-	0.12	0.3	-	0.13
Alternative 3' splice site	ENSG00000008128	CDK11A	1:1643866:1647785:-	-	-	-	-	-	0.15	-	-
Alternative 3' splice site	ENSG00000143198	MGST3	1:165600530:165618992:+	-	-	-	-	-	0.17	-	-
Alternative 3' splice site	ENSG00000008130	NADK	1:1688321:1688620:-	-	-	0.13	0.18	-	-	-	-
Alternative 3' splice site	ENSG00000219481	NBPF1	1:16894601:16895568:-	-	0.13	-	0.12	-	-	-	-
Alternative 3' splice site	ENSG00000219481	NBPF1	1:16921508:16935003:-	-	-	-	-0.19	-	-	-	-
Alternative 3' splice site	ENSG00000215908	CROCCP2	1:16946740:16952270:-	-	-	-	-	-	0.12	-	0.28
Alternative 3' splice site	ENSG00000010165	METTL13	1:171750935:171751066:+	-	-	-	-	-	-	0.28	-
Alternative 3' splice site	ENSG00000186283	TOR3A	1:179051522:179051854:+	-	-	0.13	-	-	0.22	0.44	-
Alternative 3' splice site	ENSG00000186283	TOR3A	1:179051522:179051854:+	-	-	0.14	-	-	0.28	0.53	-
Alternative 3' splice site	ENSG00000057252	SOAT1	1:179310445:179311145:+	-	-	-	-	-	-	-	-0.14
Alternative 3' splice site	ENSG00000116698	SMG7	1:183485126:183486761:+	-	0.22	-	0.13	-	0.33	0.16	-
Alternative 3' splice site	ENSG00000116750	UCHL5	1:192989586:192990227:-	-	-	-	-	-	-0.14	-	-
Alternative 3' splice site	ENSG00000127481	UBR4	1:19465714:19467282:-	-	-	-	0.17	-	-	-	-
Alternative 3' splice site	ENSG00000040487	PQLC2	1:19651256:19651989:+	-	-	-	-	-	-	0.15	-
Alternative 3' splice site	ENSG00000163485	ADORA1	1:203098310:203134184:+	-	0.37	0.17	-	-0.3	-	-0.2	-
Alternative 3' splice site	ENSG00000058673	ZC3H11A	1:203770756:203771780:+	-	-	-	-	-0.17	-	-	-
Alternative 3' splice site	ENSG00000117222	RBBP5	1:205084089:205084986:-	-	-	-	0.11	-	-	-	-
Alternative 3' splice site	ENSG00000162889	MAPKAPK2	1:206905264:206905383:+	0.14	-	0.12	-	0.16	-	0.11	-
Alternative 3' splice site	ENSG00000123838	C4BPA	1:207277775:207286244:+	-	-	-	-	-0.2	-	-	-
Alternative 3' splice site	ENSG00000162772	ATF3	1:212791576:212792388:+	0.23	0.46	0.6	0.6	-	0.22	0.79	0.12
Alternative 3' splice site	ENSG00000228106	RP11-452F19.3	1:223008557:223010265:+	-	-	-	-	-0.13	-	-	-
Alternative 3' splice site	ENSG00000162923	WDR26	1:224612421:224619179:-	-	0.12	-	-	-	0.15	-	-
Alternative 3' splice site	ENSG00000162923	WDR26	1:224612421:224619227:-	-	-	-	-	-	0.15	-	-
Alternative 3' splice site	ENSG00000168118	RAB4A	1:229431657:229433229:+	-0.13	-	-0.22	-0.17	-	0.14	-	-
Alternative 3' splice site	ENSG00000157911	PEX10	1:2338394:2339891:-	-0.18	-	-	-	-0.18	0.22	0.28	-
Alternative 3' splice site	ENSG00000188529	SRSF10	1:24294446:24298063:-	-	-	-	-	-	0.13	-	-
Alternative 3' splice site	ENSG00000188529	SRSF10	1:24301570:24304401:-	-	-0.17	-	-	-	-	-	-
Alternative 3' splice site	ENSG00000157881	PANK4	1:2442221:2442777:-	-	-	-	-	-	0.21	0.26	-
Alternative 3' splice site	ENSG00000171163	ZNF692	1:249152618:249153117:-	-	-	-	-	-	0.3	0.27	-
Alternative 3' splice site	ENSG00000157870	FAM213B	1:2519892:2519969:+	-	0.15	-	-	-	-	-	-
Alternative 3' splice site	ENSG00000117616	C1orf63	1:25570715:25571641:-	-	-	-0.16	-	-0.16	-0.17	-	-
Alternative 3' splice site	ENSG00000117640	MTFR1L	1:26149619:26149731:+	-	-	0.12	-	-	-	-	-
Alternative 3' splice site	ENSG00000117640	MTFR1L	1:26153317:26156000:+	-	0.14	-	-	-	0.18	-	-
Alternative 3' splice site	ENSG00000158062	UBXN11	1:26610772:26610853:-	-	-	-	-	-	-	-0.12	-
Alternative 3' splice site	ENSG00000117682	DHDDS	1:26764775:26769199:+	-	-	-	-	-0.16	-	-	-0.16
Alternative 3' splice site	ENSG00000142751	GPN2	1:27210806:27212464:-	-	0.14	0.15	-	-	-	-	-
Alternative 3' splice site	ENSG00000142751	GPN2	1:27215646:27216177:-	-	-	0.2	0.22	-	0.17	0.52	-
Alternative 3' splice site	ENSG00000130770	ATPIF1	1:28562963:28564272:+	-	-	0.11	-	-	-	-	-
Alternative 3' splice site	ENSG00000162419	GMEB1	1:29010252:29016586:+	-	-	-	-	-	0.16	-	-
Alternative 3' splice site	ENSG00000116353	MECR	1:29543324:29557243:-	-	0.28	-	-	-	-	-	-0.3
Alternative 3' splice site	ENSG00000121753	BAI2	1:32203168:32203253:-	-	-	-	-	-0.11	-	-	-
Alternative 3' splice site	ENSG00000121753	BAI2	1:32204789:32204909:-	-	-	-	-	-	0.25	-	-
Alternative 3' splice site	ENSG00000084652	TXLNA	1:32645377:32645915:+	-	-	-	-	-	-	-0.16	-
Alternative 3' splice site	ENSG00000160055	TMEM234	1:32681149:32681274:-	-	-	-	-	-	-0.25	-	-
Alternative 3' splice site	ENSG00000160055	TMEM234	1:32682725:32682860:-	-	-	-	-	0.27	0.25	-	-
Alternative 3' splice site	ENSG00000176261	ZBTB8OS	1:33099711:33100369:-	-	0.27	-	-	-	0.28	-	-0.24
Alternative 3' splice site	ENSG00000116514	RNF19B	1:33402910:33403998:-	-	-	-0.15	-	-	0.17	0.15	-
Alternative 3' splice site	ENSG00000196182	STK40	1:36824438:36826822:-	-	-	-0.17	-0.15	-	-	-	-
Alternative 3' splice site	ENSG00000116922	C1orf109	1:38149113:38151945:-	-	-	-	-	-0.19	-0.2	-	-
Alternative 3' splice site	ENSG00000185090	MANEAL	1:38262492:38265239:+	-	-	-	-	-	-	-	0.17
Alternative 3' splice site	ENSG00000204084	INPP5B	1:38344164:38345757:-	-	-	-	-	-0.26	-	-	-
Alternative 3' splice site	ENSG00000043514	TRIT1	1:40313419:40313658:-	-	-	-	-	-0.15	-0.14	-	-0.18
Alternative 3' splice site	ENSG00000164008	C1orf50	1:43233295:43239217:+	-0.11	-	-	-	-	-	-	-
Alternative 3' splice site	ENSG00000132768	DPH2	1:44436380:44436578:+	-	-	0.12	-	-	0.18	0.23	-
Alternative 3' splice site	ENSG00000171872	KLF17	1:44514158:44516622:+	-	-	-	-	-0.22	-	-	-
Alternative 3' splice site	ENSG00000178028	DMAP1	1:44680570:44683867:+	-	-	0.25	-	-	-	-	-
Alternative 3' splice site	ENSG00000142945	KIF2C	1:45213372:45215981:+	-	-	-	-	-	0.28	-	-
Alternative 3' splice site	ENSG00000126107	HECTD3	1:45474011:45474208:-	-	-	-	-	0.18	-	0.16	-
Alternative 3' splice site	ENSG00000126088	UROD	1:45479026:45479247:+	0.14	-	-	-	0.11	0.18	-	-
Alternative 3' splice site	ENSG00000132773	TOE1	1:45808315:45808407:+	-	-	-	-	-0.19	-	-	-0.42
Alternative 3' splice site	ENSG00000085998	POMGNT1	1:46655029:46655130:-	-	-	-0.17	-0.14	-	-	-	-
Alternative 3' splice site	ENSG00000116171	SCP2	1:53480715:53493627:+	-0.27	-	-	-	-	-	-	-
Alternative 3' splice site	ENSG00000204859	ZBTB48	1:6646090:6646655:+	-	-	-	-	-	0.16	-	-
Alternative 3' splice site	ENSG00000041988	THAP3	1:6690413:6692430:+	-	0.14	-	-	-	-	-	-
Alternative 3' splice site	ENSG00000142864	SERBP1	1:67890005:67890571:-	-	-	-	-	-	-	-	-0.22
Alternative 3' splice site	ENSG00000137955	RABGGTB	1:76257256:76257866:+	-	-	-	-	0.26	0.24	-	0.22
Alternative 3' splice site	ENSG00000187961	KLHL17	1:898297:898412:+	-	-	-	-	0.15	0.23	0.49	0.24
Alternative 3' splice site	ENSG00000014919	COX15	10:101474475:101476105:-	-	-	-0.11	-	-	-	-	-
Alternative 3' splice site	ENSG00000095485	CWF19L1	10:102020801:102021736:-	-	-	-	-0.21	-	-	-	-
Alternative 3' splice site	ENSG00000196072	BLOC1S2	10:102046089:102046362:-	0.29	0.2	0.27	0.17	0.45	0.33	0.21	-
Alternative 3' splice site	ENSG00000107821	KAZALD1	10:102822860:102823963:+	-	-	-	-	-	-	-	-0.21
Alternative 3' splice site	ENSG00000166171	DPCD	10:103364969:103368592:+	-	-	-	-	0.12	-	-	-
Alternative 3' splice site	ENSG00000171206	TRIM8	10:104415894:104416002:+	-	-	0.11	-	-	0.17	-	-
Alternative 3' splice site	ENSG00000138172	CALHM2	10:105211042:105211913:-	-	0.24	-	-	-	-	-	-
Alternative 3' splice site	ENSG00000119953	SMNDC1	10:112057503:112058406:-	0.14	-	-	-	-	0.33	-	-
Alternative 3' splice site	ENSG00000148737	TCF7L2	10:114905856:114910742:+	-	-	-	-	-	0.38	-	-
Alternative 3' splice site	ENSG00000151923	TIAL1	10:121342120:121347664:-	-	-	-	0.12	-0.18	0.12	-	-0.2
Alternative 3' splice site	ENSG00000138162	TACC2	10:123971223:123974906:+	-	-	-	-	-	-	-	-0.14
Alternative 3' splice site	ENSG00000213185	FAM24B	10:124610066:124615161:-	-	-	-	-	-	-0.29	-	-
Alternative 3' splice site	ENSG00000095574	IKZF5	10:124758187:124766542:-	-	-	-	-	-	-0.26	-	-
Alternative 3' splice site	ENSG00000154473	BUB3	10:124922344:124923336:+	-	-	-0.11	-	-	-	-	-
Alternative 3' splice site	ENSG00000123240	OPTN	10:13151288:13152180:+	-	-	-	-	-	0.16	-	-
Alternative 3' splice site	ENSG00000123240	OPTN	10:13158340:13160888:+	0.18	0.16	-	-	-	0.14	-	-
Alternative 3' splice site	ENSG00000148803	FUOM	10:135170966:135171427:-	-	-	-	-	-	-	-0.4	-
Alternative 3' splice site	ENSG00000099256	PRTFDC1	10:25146794:25147321:-	-	-	-	-	-	-	-0.11	-
Alternative 3' splice site	ENSG00000095787	WAC	10:28897360:28899628:+	-	-	-	-	-	-	-	0.11
Alternative 3' splice site	ENSG00000156502	SUPV3L1	10:70940318:70945695:+	-	0.12	-	-	-	-	-	-
Alternative 3' splice site	ENSG00000198879	SFMBT2	10:7326112:7327828:-	-	-	-	-	0.28	-	-	-
Alternative 3' splice site	ENSG00000214655	ZSWIM8	10:75554088:75554299:+	-	-	-0.27	-0.27	-	-	-	-
Alternative 3' splice site	ENSG00000214655	ZSWIM8	10:75555421:75556511:+	-	-	-	-	-	-	0.14	-
Alternative 3' splice site	ENSG00000151208	DLG5	10:79579445:79579653:-	-	-	-	-	-	0.13	-	-
Alternative 3' splice site	ENSG00000108179	PPIF	10:81111339:81112025:+	-	-	-	-	-	0.15	0.28	-
Alternative 3' splice site	ENSG00000225484	RP11-773D16.1	10:81568719:81574369:-	-	0.49	0.37	0.59	-	0.21	-	-
Alternative 3' splice site	ENSG00000155256	ZFYVE27	10:99510227:99511133:+	-	-0.21	-	-0.15	-	-	-	-
Alternative 3' splice site	ENSG00000196954	CASP4	11:104822790:104825474:-	-	-	-	-	-	-	-0.11	-0.14
Alternative 3' splice site	ENSG00000137648	TMPRSS4	11:117948020:117965531:+	-	-	0.18	-	-	-	-	-
Alternative 3' splice site	ENSG00000160695	VPS11	11:118940054:118940140:+	-	-	0.14	-	-	-	0.26	-
Alternative 3' splice site	ENSG00000160695	VPS11	11:118944661:118947529:+	-	-	0.15	0.14	-	-	-	-
Alternative 3' splice site	ENSG00000172273	HINFP	11:119003929:119004732:+	-	-	0.29	-	-	-	-	-
Alternative 3' splice site	ENSG00000170322	NFRKB	11:129754777:129755330:-	-	-	-	-	-	-	-	-0.19
Alternative 3' splice site	ENSG00000186104	CYP2R1	11:14900989:14901682:-	-	-	-	0.3	-	-	-	-
Alternative 3' splice site	ENSG00000166788	SAAL1	11:18111863:18111981:-	-	-	-	-	-0.36	-	-0.46	-0.37
Alternative 3' splice site	ENSG00000166788	SAAL1	11:18111863:18111981:-	-	-	-	-	-0.31	-	-0.41	-0.33
Alternative 3' splice site	ENSG00000130600	H19	11:2017228:2017309:-	-	-	-	-	-0.18	-0.14	-	-0.14
Alternative 3' splice site	ENSG00000130600	H19	11:2017651:2017748:-	-	-	-	-	-	-	-0.23	-
Alternative 3' splice site	ENSG00000142082	SIRT3	11:230641:232983:-	-	-	-	-	-	0.36	-	-
Alternative 3' splice site	ENSG00000169519	METTL15	11:28311944:28318300:+	-	-	-	-	-	0.17	0.2	-
Alternative 3' splice site	ENSG00000205531	NAP1L4	11:2993509:2997254:-	-	-	-	0.14	-	-	-	-
Alternative 3' splice site	ENSG00000110619	CARS	11:3023404:3023771:-	-	0.26	-	0.16	-	0.49	-	-0.16
Alternative 3' splice site	ENSG00000110619	CARS	11:3062261:3063395:-	-	-	-0.12	-	-	0.17	-	-
Alternative 3' splice site	ENSG00000110619	CARS	11:3063560:3078573:-	-	-	-	-	-	0.2	-	-
Alternative 3' splice site	ENSG00000149100	EIF3M	11:32605475:32608480:+	-	0.2	-	-	-	0.29	-	-
Alternative 3' splice site	ENSG00000182272	B4GALNT4	11:380019:380101:+	-	-	-	-	-	-	0.19	-
Alternative 3' splice site	ENSG00000182272	B4GALNT4	11:380445:380671:+	-	-	-	-	0.12	0.18	0.56	-
Alternative 3' splice site	ENSG00000148985	PGAP2	11:3845606:3846026:+	-	-	-	-	-	0.2	-	-
Alternative 3' splice site	ENSG00000149091	DGKZ	11:46400786:46401004:+	-	-	-	-	-	0.14	-	-
Alternative 3' splice site	ENSG00000149179	C11orf49	11:47159280:47176707:+	0.16	-	-	-	0.16	0.15	-	-
Alternative 3' splice site	ENSG00000149179	C11orf49	11:47182741:47182997:+	-	-	0.17	0.15	-	-	-	-
Alternative 3' splice site	ENSG00000149182	ARFGAP2	11:47196964:47197402:-	-	-	-	-	-	-	0.3	-
Alternative 3' splice site	ENSG00000165912	PACSIN3	11:47204360:47204555:-	-	-	0.12	0.13	-	-	-	-
Alternative 3' splice site	ENSG00000134574	DDB2	11:47236814:47237745:+	-	-	-	-	-	0.28	-	-
Alternative 3' splice site	ENSG00000149187	CELF1	11:47493654:47493743:-	-	-	-	-	-	0.3	0.42	0.24
Alternative 3' splice site	ENSG00000023191	RNH1	11:500738:502062:-	-	-	-	-	-	0.17	-	-
Alternative 3' splice site	ENSG00000023191	RNH1	11:502249:504824:-	-	-	-	-	-	0.24	-	-
Alternative 3' splice site	ENSG00000023191	RNH1	11:502249:507113:-	-	0.12	-	-	-	0.15	-	-
Alternative 3' splice site	ENSG00000134802	SLC43A3	11:57193862:57194061:-	-	-	-	-	-	0.22	-	-0.12
Alternative 3' splice site	ENSG00000134802	SLC43A3	11:57194223:57194359:-	-	-	-	-	-	0.17	-	-
Alternative 3' splice site	ENSG00000149150	SLC43A1	11:57268847:57281431:-	-	-	-	-	-	0.18	-	-
Alternative 3' splice site	ENSG00000134809	TIMM10	11:57297766:57298131:-	-	-	-	-	-	0.18	0.13	-
Alternative 3' splice site	ENSG00000149476	DAK	11:61100801:61101021:+	0.17	-	-	-	-	-	-	-
Alternative 3' splice site	ENSG00000187049	TMEM216	11:61161448:61165200:+	-	-	-	-	-	0.26	-	-0.12
Alternative 3' splice site	ENSG00000149499	EML3	11:62370361:62370621:-	-	-	-	-	-	-0.24	-	-
Alternative 3' splice site	ENSG00000133316	WDR74	11:62607339:62607550:-	-	-	-	-	-	-	-	-0.5
Alternative 3' splice site	ENSG00000255717	SNHG1	11:62621536:62621991:-	-0.19	-0.2	-	-	-0.24	-0.2	-	-
Alternative 3' splice site	ENSG00000149781	FERMT3	11:63987261:63987351:+	-	-	-	-	-	0.22	-	-
Alternative 3' splice site	ENSG00000149743	TRPT1	11:63991685:63991757:-	-	-	-0.27	-	-	-	-	-
Alternative 3' splice site	ENSG00000149743	TRPT1	11:63991685:63991757:-	-0.21	-0.17	-0.19	-0.1	-	-	-0.11	-
Alternative 3' splice site	ENSG00000168066	SF1	11:64533627:64534372:-	-	-	-	0.13	-	-0.31	-	-
Alternative 3' splice site	ENSG00000110047	EHD1	11:64623269:64627396:-	-	0.15	-	0.15	-	0.35	0.4	-
Alternative 3' splice site	ENSG00000110046	ATG2A	11:64674911:64674997:-	-	-	-	-	0.14	-	-	-
Alternative 3' splice site	ENSG00000132254	ARFIP2	11:6500587:6501202:-	-	-	0.29	-	-	-	0.14	-
Alternative 3' splice site	ENSG00000132254	ARFIP2	11:6500684:6501202:-	-	-	0.35	-	-	0.12	0.2	-
Alternative 3' splice site	ENSG00000132254	ARFIP2	11:6501339:6501553:-	-	-	0.15	-	-	-	0.2	-
Alternative 3' splice site	ENSG00000132254	ARFIP2	11:6501693:6502461:-	-	-	0.18	-	-	-	-	-
Alternative 3' splice site	ENSG00000132254	ARFIP2	11:6501693:6502461:-	-	-	0.14	-	-	-	-	-
Alternative 3' splice site	ENSG00000142186	SCYL1	11:65304221:65304457:+	-	-	0.11	-	-	-	-	-
Alternative 3' splice site	ENSG00000173327	MAP3K11	11:65374434:65374741:-	-	-	-	0.2	-	-	0.71	-
Alternative 3' splice site	ENSG00000197136	PCNXL3	11:65398075:65401550:+	-	-	-	-	-	0.17	-	-
Alternative 3' splice site	ENSG00000175550	DRAP1	11:65687933:65688019:+	-	-	-	-	-	0.11	0.16	-
Alternative 3' splice site	ENSG00000175376	EIF1AD	11:65767976:65769381:-	-	0.19	0.36	0.27	-0.15	-	-	-
Alternative 3' splice site	ENSG00000175376	EIF1AD	11:65767976:65769511:-	-	-	0.39	0.23	-	-	0.21	-
Alternative 3' splice site	ENSG00000132275	RRP8	11:6623494:6624634:-	-	-	-	-	-0.2	0.17	0.16	-0.25
Alternative 3' splice site	ENSG00000173992	CCS	11:66368020:66372625:+	-	-	-	0.11	-	0.18	-	-
Alternative 3' splice site	ENSG00000173933	RBM4	11:66406223:66407149:+	-	-	0.32	0.24	-	-	0.49	-
Alternative 3' splice site	ENSG00000172932	ANKRD13D	11:67057917:67058063:+	0.33	-	0.46	0.46	-	-	0.68	-
Alternative 3' splice site	ENSG00000172830	SSH3	11:67077439:67077537:+	-	-	-	-	-	-0.22	0.23	-
Alternative 3' splice site	ENSG00000172613	RAD9A	11:67161081:67161162:+	-	-	-	-	-	-	-	-0.27
Alternative 3' splice site	ENSG00000172663	TMEM134	11:67232738:67234783:-	-	0.13	-	-	-	-	-	-
Alternative 3' splice site	ENSG00000172663	TMEM134	11:67235061:67235488:-	-	-	-	-	-	-	-	0.21
Alternative 3' splice site	ENSG00000172663	TMEM134	11:67235061:67235499:-	0.17	-	-	-	-	-	-	-
Alternative 3' splice site	ENSG00000110075	PPP6R3	11:68343511:68355395:+	-	-	-	0.26	-	-	-	-
Alternative 3' splice site	ENSG00000110075	PPP6R3	11:68343511:68355395:+	-	0.16	-	-	-	-	-	-
Alternative 3' splice site	ENSG00000177106	EPS8L2	11:709608:710028:+	-	-	-	-	-	0.13	-	-
Alternative 3' splice site	ENSG00000177106	EPS8L2	11:709608:710028:+	-	-	-	-	-	0.14	-	-
Alternative 3' splice site	ENSG00000110200	ANAPC15	11:71822332:71822458:-	-0.16	-	-	-	-	-	-	-
Alternative 3' splice site	ENSG00000177106	EPS8L2	11:726751:726901:+	-	-	-	-	-0.27	-	-	-
Alternative 3' splice site	ENSG00000177225	PDDC1	11:771212:771333:-	-	-	-	-	0.24	0.29	0.35	0.17
Alternative 3' splice site	ENSG00000177225	PDDC1	11:771467:772427:-	-	-	-	-	-	0.12	-	-
Alternative 3' splice site	ENSG00000159063	ALG8	11:77817992:77820488:-	-	-	-	-	-	-	0.11	-
Alternative 3' splice site	ENSG00000177542	SLC25A22	11:794588:794776:-	-	-	0.27	-	-	-	-	-
Alternative 3' splice site	ENSG00000171202	TMEM126A	11:85361385:85365085:+	-	-	-	0.14	-	-	-	-
Alternative 3' splice site	ENSG00000137501	SYTL2	11:85428769:85429833:-	0.12	-	-	-	-	-	-	-
Alternative 3' splice site	ENSG00000073921	PICALM	11:85693046:85694909:-	-	-	-	-0.15	-	0.13	-	-
Alternative 3' splice site	ENSG00000073921	PICALM	11:85701442:85707869:-	-	-	-	-0.19	-	-	-	-
Alternative 3' splice site	ENSG00000166444	ST5	11:8725158:8728632:-	-	-	-	-	-	0.15	-	-
Alternative 3' splice site	ENSG00000166012	TAF1D	11:93465479:93466253:-	0.21	0.25	-	0.26	-	0.17	-	-
Alternative 3' splice site	ENSG00000166012	TAF1D	11:93466671:93467791:-	-	-	0.43	0.36	0.44	0.23	0.6	0.65
Alternative 3' splice site	ENSG00000075856	SART3	12:108938308:108938915:-	-	-	-	-	-	0.17	-	-0.18
Alternative 3' splice site	ENSG00000136003	ISCU	12:108956512:108957836:+	-	-	0.16	0.11	-	-	-	-
Alternative 3' splice site	ENSG00000189046	ALKBH2	12:109530742:109531052:-	-	-	-	-	-0.18	0.41	0.26	-
Alternative 3' splice site	ENSG00000189046	ALKBH2	12:109530742:109531155:-	-	-	-	-	-0.22	-	-	-
Alternative 3' splice site	ENSG00000110906	KCTD10	12:109895989:109898441:-	-	-	-	-	-	-	0.13	-
Alternative 3' splice site	ENSG00000139428	MMAB	12:109999134:109999225:-	-	0.12	-	-	-	-	-	-
Alternative 3' splice site	ENSG00000139436	GIT2	12:110386651:110388972:-	-	0.3	-	0.21	-	0.46	-	0.14
Alternative 3' splice site	ENSG00000234608	MAPKAPK5-AS1	12:112278281:112279131:-	-0.19	-	-	-	-0.14	-	-	-
Alternative 3' splice site	ENSG00000123066	MED13L	12:116413154:116413320:-	-	-	-	-	-	0.11	-	-
Alternative 3' splice site	ENSG00000135108	FBXO21	12:117595889:117603290:-	0.2	0.19	-	-	-	-	-	-
Alternative 3' splice site	ENSG00000089159	PXN	12:120653220:120653363:-	-0.19	-	-	-	-0.11	0.27	-	-
Alternative 3' splice site	ENSG00000089159	PXN	12:120653220:120659426:-	-0.15	0.12	-0.12	-	-0.11	0.24	-	-
Alternative 3' splice site	ENSG00000088986	DYNLL1	12:120934019:120934205:+	-	-	-	-	-	0.11	-	-
Alternative 3' splice site	ENSG00000111011	RSRC2	12:123003598:123005051:-	0.26	0.11	-	0.1	0.43	0.4	-	-
Alternative 3' splice site	ENSG00000111011	RSRC2	12:123003598:123005932:-	0.28	0.14	-	-	0.2	0.3	-0.16	-
Alternative 3' splice site	ENSG00000111325	OGFOD2	12:123460414:123461148:+	-	-	-	-	-	-	-	0.27
Alternative 3' splice site	ENSG00000111325	OGFOD2	12:123461517:123462907:+	-	-	-	0.41	-	-	-	-
Alternative 3' splice site	ENSG00000111325	OGFOD2	12:123461517:123462907:+	-	-	-	0.37	-	-	-	-
Alternative 3' splice site	ENSG00000182196	ARL6IP4	12:123465813:123466118:+	-	-	-	-	-	-	0.2	-
Alternative 3' splice site	ENSG00000182196	ARL6IP4	12:123465846:123466118:+	-	-	-	-	-	-	0.19	-
Alternative 3' splice site	ENSG00000139370	SLC15A4	12:129294656:129299320:-	-	-	-	-	-	-	0.2	-
Alternative 3' splice site	ENSG00000183495	EP400	12:132549431:132551319:+	-0.28	-	-	-	-	-	-	-
Alternative 3' splice site	ENSG00000185684	EP400NL	12:132568944:132569509:+	-	0.17	0.26	0.26	-	-	-	-
Alternative 3' splice site	ENSG00000072609	CHFR	12:133446420:133447310:-	-	0.21	-	-	-	-	-	-
Alternative 3' splice site	ENSG00000072609	CHFR	12:133446420:133447310:-	-	0.21	-	-	-	-	-	-
Alternative 3' splice site	ENSG00000211455	STK38L	12:27468050:27468151:+	-	-	-	-	0.11	-	-	-
Alternative 3' splice site	ENSG00000013573	DDX11	12:31242424:31242774:+	-	-	-	-	0.12	-	0.17	-
Alternative 3' splice site	ENSG00000013573	DDX11	12:31250931:31253494:+	-	-	-	-	-	0.33	-	-
Alternative 3' splice site	ENSG00000134283	PPHLN1	12:42836543:42838849:+	-	-	-	0.12	-	-	-	-
Alternative 3' splice site	ENSG00000134283	PPHLN1	12:42836543:42838849:+	-	-	-	0.12	-	-	-	-
Alternative 3' splice site	ENSG00000167535	CACNB3	12:49219552:49220028:+	-	-	-	-	-	0.11	0.15	-
Alternative 3' splice site	ENSG00000167535	CACNB3	12:49219552:49220150:+	-	-	-0.18	-	-	-	-	-
Alternative 3' splice site	ENSG00000134285	FKBP11	12:49317757:49318006:-	-	-	-	-	0.35	0.12	0.49	-
Alternative 3' splice site	ENSG00000167550	RHEBL1	12:49462957:49463517:-	-	-	-	-	-	-0.17	-	-0.2
Alternative 3' splice site	ENSG00000167552	TUBA1A	12:49580241:49580394:-	-	-	-	-	-	-0.16	-	-
Alternative 3' splice site	ENSG00000187778	MCRS1	12:49959462:49959860:-	-	-	-	-0.13	-	-	-	-
Alternative 3' splice site	ENSG00000123268	ATF1	12:51174021:51189681:+	-	-	-	-	-	0.23	-	-
Alternative 3' splice site	ENSG00000050426	LETMD1	12:51442261:51442796:+	-	-	-	-	-	0.15	-	-
Alternative 3' splice site	ENSG00000050426	LETMD1	12:51450285:51451789:+	-	0.12	0.11	-	-	-	-	-
Alternative 3' splice site	ENSG00000123358	NR4A1	12:52450429:52450674:+	-	0.19	0.53	0.54	-	0.14	0.78	-
Alternative 3' splice site	ENSG00000167767	KRT80	12:52565341:52565442:-	-	-	-	0.12	-	-	-	-
Alternative 3' splice site	ENSG00000139546	TARBP2	12:53898253:53898396:+	-	-	-	-	-	0.17	-	-
Alternative 3' splice site	ENSG00000229117	RPL41	12:56510583:56510973:+	-	-	-	-	0.12	-	-	-
Alternative 3' splice site	ENSG00000139641	ESYT1	12:56512102:56512732:+	-	-	-	-	-	-	0.19	-
Alternative 3' splice site	ENSG00000139641	ESYT1	12:56527657:56527864:+	0.13	-	0.17	-	-	-	-	-
Alternative 3' splice site	ENSG00000170581	STAT2	12:56749587:56749916:-	-0.19	-	-	-0.16	-	-	-	-
Alternative 3' splice site	ENSG00000076108	BAZ2A	12:57000179:57000417:-	-	-	-	-	-	0.16	-	-
Alternative 3' splice site	ENSG00000076108	BAZ2A	12:57004323:57005357:-	-	0.17	-	-	-	-	-	-
Alternative 3' splice site	ENSG00000175197	DDIT3	12:57911378:57911489:-	-	0.36	0.43	0.39	0.28	0.47	0.59	0.19
Alternative 3' splice site	ENSG00000175197	DDIT3	12:57911378:57911489:-	-	0.37	0.44	0.4	0.3	0.49	0.6	0.19
Alternative 3' splice site	ENSG00000166987	MBD6	12:57918199:57918413:+	-	-	0.18	0.14	-	0.14	0.23	-
Alternative 3' splice site	ENSG00000135454	B4GALNT1	12:58022957:58023935:-	0.17	-	-	-	-	-	-	-
Alternative 3' splice site	ENSG00000037897	METTL1	12:58163206:58163348:-	-	-	-	-	-	0.16	-	-
Alternative 3' splice site	ENSG00000111641	NOP2	12:6675502:6675695:-	-	-	-	-	-	-	-0.22	-
Alternative 3' splice site	ENSG00000111642	CHD4	12:6709561:6709700:-	-	-	-	-	-	0.14	-	-
Alternative 3' splice site	ENSG00000111642	CHD4	12:6711341:6711542:-	-	-	-	-	-	-	-	-0.14
Alternative 3' splice site	ENSG00000159335	PTMS	12:6878840:6879010:+	-	-	-	-	-	0.18	-	-
Alternative 3' splice site	ENSG00000111676	ATN1	12:7037547:7043003:+	-	-	-	-	0.17	-	-	-
Alternative 3' splice site	ENSG00000111679	PTPN6	12:7069598:7069826:+	-	0.12	-	-	-	0.36	0.6	-0.15
Alternative 3' splice site	ENSG00000205885	C1RL-AS1	12:7263168:7263621:+	-	-	-	-	0.41	0.42	-	-
Alternative 3' splice site	ENSG00000226210	ABC7-42389800N19.1	12:87703:87872:+	-	-	-	0.18	-	-	-	-
Alternative 3' splice site	ENSG00000120798	NR2C1	12:95461167:95467156:-	-	-	-	-0.2	-	-	-	-
Alternative 3' splice site	ENSG00000028203	VEZT	12:95660408:95663815:+	-	-	-	0.39	-	-	-	-
Alternative 3' splice site	ENSG00000028203	VEZT	12:95690034:95692870:+	-	-	-	0.12	-	-	-	-
Alternative 3' splice site	ENSG00000213995	CARKD	13:111289596:111290589:+	0.18	0.27	0.44	0.36	-	0.25	0.6	0.11
Alternative 3' splice site	ENSG00000134905	CARS2	13:111296529:111296732:-	0.12	-	-	-	-	-	-	-
Alternative 3' splice site	ENSG00000134905	CARS2	13:111296953:111298314:-	-	-	-	-	-	0.11	-	-
Alternative 3' splice site	ENSG00000126226	PCID2	13:113832322:113832488:-	-	-	-	-	-	0.14	0.12	-
Alternative 3' splice site	ENSG00000120699	EXOSC8	13:37577144:37578614:+	-	-	0.15	-	-	-	-	-
Alternative 3' splice site	ENSG00000102710	SUPT20H	13:37596454:37598172:-	-	-	-	0.27	-	-	-	-
Alternative 3' splice site	ENSG00000102710	SUPT20H	13:37597181:37598172:-	-	-	-	0.15	-	-	-	0.18
Alternative 3' splice site	ENSG00000136146	MED4	13:48654126:48655781:-	-	0.21	-	-	-	-	-	-
Alternative 3' splice site	ENSG00000136153	LMO7	13:76408523:76409288:+	-	-	-	-	-0.18	-	-	-0.19
Alternative 3' splice site	ENSG00000139746	RBM26	13:79940360:79940768:-	-	-	-	-	-	0.29	0.22	-
Alternative 3' splice site	ENSG00000080823	MOK	14:102699045:102700025:-	-	-	-	-	-	-	0.15	-
Alternative 3' splice site	ENSG00000185215	TNFAIP2	14:103598099:103599039:+	-	0.11	-	0.19	-	0.13	-	-
Alternative 3' splice site	ENSG00000075413	MARK3	14:103933528:103934370:+	-	0.16	-	-	-	-	-	-
Alternative 3' splice site	ENSG00000126214	KLC1	14:104143860:104145646:+	0.12	0.12	-	-	-0.19	0.18	-	-0.23
Alternative 3' splice site	ENSG00000126214	KLC1	14:104143860:104145646:+	0.12	0.13	-	-	-0.19	0.18	-	-0.22
Alternative 3' splice site	ENSG00000099814	CEP170B	14:105354315:105355852:+	-	-	-	0.17	-	-	-	-
Alternative 3' splice site	ENSG00000184916	JAG2	14:105613125:105613663:-	-	-	-	-	-	-	0.19	-
Alternative 3' splice site	ENSG00000185024	BRF1	14:105685635:105686406:-	-	0.19	0.15	-	-	-	-	-
Alternative 3' splice site	ENSG00000129566	TEP1	14:20837735:20837833:-	-	-0.11	-	-	-	-	-	-
Alternative 3' splice site	ENSG00000092094	OSGEP	14:20917460:20920133:-	-	-	-	-	-	-	-	-0.14
Alternative 3' splice site	ENSG00000100823	APEX1	14:20923862:20923961:+	-	-	-	0.11	-	-	0.12	-
Alternative 3' splice site	ENSG00000165792	METTL17	14:21458757:21460251:+	-	-	-	-	-	-	-	-0.19
Alternative 3' splice site	ENSG00000100888	CHD8	14:21868490:21868572:-	0.15	-	-	0.11	-	-	-	-
Alternative 3' splice site	ENSG00000155463	OXA1L	14:23237380:23238986:+	-	-	-	-	-	0.13	-	-
Alternative 3' splice site	ENSG00000100802	C14orf93	14:23468611:23470168:-	-	-	-	-	-	-	0.32	-
Alternative 3' splice site	ENSG00000100897	DCAF11	14:24584935:24586126:+	-	-	-	-	-	-	-	0.18
Alternative 3' splice site	ENSG00000100908	EMC9	14:24609025:24610098:-	-	0.11	0.19	-	-	0.27	0.13	-
Alternative 3' splice site	ENSG00000100911	PSME2	14:24615105:24615417:-	-	-	-	-	-0.13	-	-	-0.14
Alternative 3' splice site	ENSG00000129559	NEDD8	14:24701073:24701456:-	-	-	-	-	-	-	0.12	-
Alternative 3' splice site	ENSG00000100949	RABGGTA	14:24740204:24740319:-	-	0.2	0.21	-	-	-	-	-
Alternative 3' splice site	ENSG00000092148	HECTD1	14:31598654:31602444:-	-	-	0.19	0.15	-	-	-	-
Alternative 3' splice site	ENSG00000165525	NEMF	14:50295525:50295772:-	0.15	-	-	-	-	-	-	-
Alternative 3' splice site	ENSG00000020577	SAMD4A	14:55243258:55251058:+	-	-	-	-	-	0.16	-	-
Alternative 3' splice site	ENSG00000072415	MPP5	14:67736500:67745735:+	-	-	-	0.2	-0.3	-	0.28	-
Alternative 3' splice site	ENSG00000100650	SRSF5	14:70235968:70236228:+	-	-	0.16	0.14	-	-	0.17	-0.22
Alternative 3' splice site	ENSG00000133997	MED6	14:71059726:71060013:-	-	-0.13	-	-0.14	-	-	-	-
Alternative 3' splice site	ENSG00000133997	MED6	14:71063459:71064335:-	-	-	0.13	-	-	-	-	-
Alternative 3' splice site	ENSG00000080815	PSEN1	14:73603291:73614461:+	-	0.11	-	-	-	-	-	-
Alternative 3' splice site	ENSG00000119682	KIAA0317	14:75136845:75137465:-	-	0.15	-	-	-	0.15	-	-
Alternative 3' splice site	ENSG00000119616	FCF1	14:75181646:75182524:+	-	-	0.13	-	-	-	-	-
Alternative 3' splice site	ENSG00000119718	EIF2B2	14:75471603:75472544:+	-	-	-	-	-	-	0.16	-
Alternative 3' splice site	ENSG00000119685	TTLL5	14:76231115:76232405:+	0.19	-	-	-	-	-	-	-
Alternative 3' splice site	ENSG00000119685	TTLL5	14:76241973:76243048:+	0.11	-	-	-	-	-	-	-
Alternative 3' splice site	ENSG00000151445	VIPAS39	14:77907516:77908903:-	0.12	-	-	-	-	-	-	-
Alternative 3' splice site	ENSG00000100601	ALKBH1	14:78142192:78146223:-	-	-	-	-0.2	0.11	-	-	-
Alternative 3' splice site	ENSG00000140181	HERC2P2	15:23283416:23285705:-	-	-	-	-	-	0.26	-	-
Alternative 3' splice site	ENSG00000172575	RASGRP1	15:38791385:38792304:-	-	-	-	0.23	-	-	-	-
Alternative 3' splice site	ENSG00000137824	RMDN3	15:41043868:41044184:-	0.16	-	-	-	0.25	0.15	-	-
Alternative 3' splice site	ENSG00000104129	DNAJC17	15:41068599:41068740:-	-	0.29	-	-	-	0.29	-0.15	-0.11
Alternative 3' splice site	ENSG00000092445	TYRO3	15:41864762:41865200:+	-	-	-	-	-0.13	-	-	-
Alternative 3' splice site	ENSG00000166946	CCNDBP1	15:43485001:43486279:+	-	-	-	-	-	-	0.14	-
Alternative 3' splice site	ENSG00000137822	TUBGCP4	15:43668424:43668653:+	-	-	-	-	-0.14	-	-	-0.12
Alternative 3' splice site	ENSG00000081014	AP4E1	15:51204346:51207622:+	-	0.16	-	-	-	-	-	-
Alternative 3' splice site	ENSG00000138594	TMOD3	15:52201059:52203211:+	-	-	-	-	0.22	-	0.21	0.16
Alternative 3' splice site	ENSG00000157450	RNF111	15:59383353:59384712:+	-	-	-	-	-	0.24	-	-
Alternative 3' splice site	ENSG00000166233	ARIH1	15:72859518:72862505:+	-	-	-0.11	-	-	-	-	-
Alternative 3' splice site	ENSG00000140465	CYP1A1	15:75014410:75014614:-	-	-	-	-	-	-	-	-0.11
Alternative 3' splice site	ENSG00000140365	COMMD4	15:75631445:75631549:+	-	0.17	0.2	0.16	-0.12	-0.15	-	-
Alternative 3' splice site	ENSG00000140400	MAN2C1	15:75651532:75651669:-	0.14	0.15	-	0.17	-	-	-	-
Alternative 3' splice site	ENSG00000140400	MAN2C1	15:75651779:75651961:-	0.17	-	0.32	-	-	-	-	-
Alternative 3' splice site	ENSG00000140400	MAN2C1	15:75660318:75660414:-	0.11	-	-	-	0.22	-	0.22	-
Alternative 3' splice site	ENSG00000140395	WDR61	15:78585227:78585509:-	-	-	-	-	-	0.2	-	-
Alternative 3' splice site	ENSG00000180953	ST20	15:80200048:80215794:-	-	0.14	-	-	-	-	-	-
Alternative 3' splice site	ENSG00000156232	WHAMM	15:83492039:83495140:+	-	-	-	-	-	0.15	-	-
Alternative 3' splice site	ENSG00000170776	AKAP13	15:86260633:86261238:+	-	-	-	0.28	-	-	-	-
Alternative 3' splice site	ENSG00000172183	ISG20	15:89182825:89193466:+	-	0.15	-	0.13	-0.12	0.14	-	-
Alternative 3' splice site	ENSG00000185043	CIB1	15:90775679:90776901:-	-	-	-	-	-	0.15	-	-
Alternative 3' splice site	ENSG00000184508	HDDC3	15:91474786:91474934:-	-	-	0.13	0.13	-	-	-	-
Alternative 3' splice site	ENSG00000173575	CHD2	15:93518180:93521378:+	0.12	0.41	-	-	0.28	0.37	-	-
Alternative 3' splice site	ENSG00000007384	RHBDF1	16:110096:110214:-	-	0.11	0.22	-	-	0.29	0.51	-
Alternative 3' splice site	ENSG00000007384	RHBDF1	16:112693:112773:-	-	-	-	-	0.2	-	-	-
Alternative 3' splice site	ENSG00000007384	RHBDF1	16:113920:114697:-	-	-	-	-	-	0.24	-	-
Alternative 3' splice site	ENSG00000007384	RHBDF1	16:114438:114697:-	-	-	-	-	-	0.11	0.21	-
Alternative 3' splice site	ENSG00000059145	UNKL	16:1449558:1451569:-	-	-	-	-	0.14	-	-	-
Alternative 3' splice site	ENSG00000183426	NPIP	16:15029254:15031231:+	-	0.2	0.48	-	-0.28	0.52	-	-
Alternative 3' splice site	ENSG00000100726	TELO2	16:1543606:1544247:+	0.13	-	-	-	-	-	-	-
Alternative 3' splice site	ENSG00000167186	COQ7	16:19079059:19083106:+	-	-	-	-	-	-	-	-0.11
Alternative 3' splice site	ENSG00000103544	C16orf62	16:19576272:19580566:+	-	-	-	0.13	-	-	-	-
Alternative 3' splice site	ENSG00000183751	TBL3	16:2024108:2024182:+	-	0.11	-	-	-	-	-	-
Alternative 3' splice site	ENSG00000065054	SLC9A3R2	16:2087601:2087827:+	0.12	-	-	0.18	-	-	-	-
Alternative 3' splice site	ENSG00000011638	TMEM159	16:21170067:21172299:+	-	-	-	-0.2	-	0.32	-	-
Alternative 3' splice site	ENSG00000008710	PKD1	16:2155708:2155866:-	-	0.36	-	0.31	-	0.5	-	-
Alternative 3' splice site	ENSG00000131653	TRAF7	16:2214002:2215858:+	-	-	-	-	-	0.11	-	-
Alternative 3' splice site	ENSG00000167965	MLST8	16:2256660:2256724:+	-	-	0.12	0.3	-	-	-	-
Alternative 3' splice site	ENSG00000167967	E4F1	16:2273771:2278293:+	-	-	-	-	0.15	0.19	-	-
Alternative 3' splice site	ENSG00000103365	GGA2	16:23504908:23505624:-	-	-	0.21	-	-	-	-	-
Alternative 3' splice site	ENSG00000166847	DCTN5	16:23677049:23678338:+	-	-	-	-	-	0.28	-	-
Alternative 3' splice site	ENSG00000090905	TNRC6A	16:24816472:24816926:+	-0.14	-	-	-	-	-	-	-
Alternative 3' splice site	ENSG00000176476	CCDC101	16:28601546:28601617:+	-	-0.15	-	-	-	-	-	-
Alternative 3' splice site	ENSG00000196502	SULT1A1	16:28620211:28621252:-	-	-	-	-	-	0.28	-	-
Alternative 3' splice site	ENSG00000168488	ATXN2L	16:28842393:28843508:+	-	-	-	-	-	0.16	-	-
Alternative 3' splice site	ENSG00000213648	SULT1A4	16:29471306:29472672:+	-	-	-	-	0.13	-	-	-
Alternative 3' splice site	ENSG00000213648	SULT1A4	16:29474982:29475463:+	-	-	-	0.25	-	-	-	-
Alternative 3' splice site	ENSG00000079616	KIF22	16:29815386:29815897:+	-	-	-	-	-	-	0.17	-
Alternative 3' splice site	ENSG00000174943	KCTD13	16:29922878:29923136:-	-	-	0.26	-	-	0.33	0.58	-
Alternative 3' splice site	ENSG00000149923	PPP4C	16:30087796:30092521:+	-	-	-	-	-	-	0.14	-
Alternative 3' splice site	ENSG00000102886	GDPD3	16:30123542:30123627:-	-	-	-	-	-	-	-	0.15
Alternative 3' splice site	ENSG00000127564	PKMYT1	16:3023254:3024001:-	0.16	-	-	-	-	0.17	-	-
Alternative 3' splice site	ENSG00000127564	PKMYT1	16:3023446:3024001:-	0.11	-	-	-	-	0.18	-	-
Alternative 3' splice site	ENSG00000006327	TNFRSF12A	16:3070492:3071190:+	-	0.12	-	-	-	-	-	-
Alternative 3' splice site	ENSG00000131652	THOC6	16:3075989:3076046:+	-	-	-	-	-	-	0.19	-
Alternative 3' splice site	ENSG00000156873	PHKG2	16:30762924:30764506:+	-	0.14	-	-	-	0.23	-	-
Alternative 3' splice site	ENSG00000156873	PHKG2	16:30764878:30767688:+	-	-	-	-	-	-0.17	-	-
Alternative 3' splice site	ENSG00000103549	RNF40	16:30783294:30783390:+	-	-	-	-	-	0.17	-	-
Alternative 3' splice site	ENSG00000103496	STX4	16:31045435:31045525:+	-	-	-	-	0.15	0.13	-	-
Alternative 3' splice site	ENSG00000122386	ZNF205	16:3162683:3163350:+	-	-	-	-	0.32	-	-	0.24
Alternative 3' splice site	ENSG00000085644	ZNF213	16:3187680:3188355:+	-	-	-	-	-	0.23	-	-
Alternative 3' splice site	ENSG00000217930	PAM16	16:4391673:4393208:-	0.12	-	-	-	-	0.21	-	-
Alternative 3' splice site	ENSG00000153443	UBALD1	16:4660657:4664679:-	-	0.18	0.24	0.21	-	0.33	0.38	-
Alternative 3' splice site	ENSG00000168096	ANKS3	16:4776855:4776980:-	-	-	-	-	-	0.13	-	-0.23
Alternative 3' splice site	ENSG00000118900	UBN1	16:4908664:4908879:+	0.12	0.11	-	0.11	-	0.38	0.15	-
Alternative 3' splice site	ENSG00000155393	HEATR3	16:50102778:50104055:+	-	-	-	-	0.13	0.21	-	-
Alternative 3' splice site	ENSG00000087263	OGFOD1	16:56487320:56492425:+	-	-	-	-	-	0.13	-	-
Alternative 3' splice site	ENSG00000005194	CIAPIN1	16:57473246:57474684:-	-	-	-	-0.12	-	-	-	-
Alternative 3' splice site	ENSG00000205336	GPR56	16:57684263:57685097:+	-	-	-	-	-	-	-	0.18
Alternative 3' splice site	ENSG00000205336	GPR56	16:57684263:57685097:+	-	-	-	-	-	-	-	0.18
Alternative 3' splice site	ENSG00000205336	GPR56	16:57691403:57693307:+	-	-	-0.13	-	-	-	-	-0.11
Alternative 3' splice site	ENSG00000140854	KATNB1	16:57789406:57789702:+	-	-	-	-	-	0.17	-	-
Alternative 3' splice site	ENSG00000135720	DYNC1LI2	16:66785289:66785388:-	-	-	-	-	-	0.11	-	-
Alternative 3' splice site	ENSG00000159753	RLTPR	16:67689970:67690097:+	-	-	-	-	-	0.14	-	-
Alternative 3' splice site	ENSG00000141084	RANBP10	16:67762504:67763183:-	-	0.19	-	-	-	0.2	-	-
Alternative 3' splice site	ENSG00000103067	ESRP2	16:68266620:68266664:-	-	-	0.13	-	-	-	-	-
Alternative 3' splice site	ENSG00000103066	PLA2G15	16:68289283:68289609:+	-	-	0.12	-	-	0.11	0.22	-
Alternative 3' splice site	ENSG00000103061	SLC7A6OS	16:68336412:68337929:-	-	-	-0.16	-	-0.19	-	-	-0.24
Alternative 3' splice site	ENSG00000132600	PRMT7	16:68386312:68387298:+	0.23	-	-	-	-	0.14	-0.11	-
Alternative 3' splice site	ENSG00000130731	C16orf13	16:685063:685281:-	-	-	-	-	-0.13	0.18	-	-
Alternative 3' splice site	ENSG00000184939	ZFP90	16:68592027:68592278:+	-	0.12	-	-	-	-	-	-
Alternative 3' splice site	ENSG00000132604	TERF2	16:69402498:69404386:-	-	0.12	-	-	-	-	-	-0.14
Alternative 3' splice site	ENSG00000226232	RP11-419C5.2	16:70016448:70016561:-	-	0.14	-	-	-	-	-	-
Alternative 3' splice site	ENSG00000090857	PDPR	16:70176292:70176374:+	0.11	0.25	0.21	0.4	-	-	-	-
Alternative 3' splice site	ENSG00000140983	RHOT2	16:720175:720249:+	-	-	-	-	-	-	-	0.17
Alternative 3' splice site	ENSG00000140983	RHOT2	16:721000:721083:+	-	-	-	-	-	0.22	0.13	0.24
Alternative 3' splice site	ENSG00000140983	RHOT2	16:722384:722472:+	-	0.16	-	0.14	-	-	-0.13	-
Alternative 3' splice site	ENSG00000214331	RP11-252A24.2	16:74372558:74372637:-	-	-0.51	-	-	-	0.37	-	-
Alternative 3' splice site	ENSG00000205084	TMEM231	16:75579975:75589702:-	-	-	-	-	-	-	-	-0.19
Alternative 3' splice site	ENSG00000065427	KARS	16:75670445:75675462:-	-	-	-	-	-0.11	-	-	-
Alternative 3' splice site	ENSG00000007376	RPUSD1	16:837241:837354:-	-	-	0.15	0.14	-	-	0.13	-
Alternative 3' splice site	ENSG00000103168	TAF1C	16:84216939:84217016:-	0.22	0.27	0.25	-	-	-	-	-
Alternative 3' splice site	ENSG00000103168	TAF1C	16:84217137:84217303:-	-	-	-	0.2	-	0.29	-	-
Alternative 3' splice site	ENSG00000103168	TAF1C	16:84218666:84220507:-	-	-	-	-	-0.2	-	-	-
Alternative 3' splice site	ENSG00000127586	CHTF18	16:843274:844040:+	-	-	-	-	-	0.15	-	-
Alternative 3' splice site	ENSG00000153786	ZDHHC7	16:85012928:85015476:-	0.11	0.12	-	0.12	-	0.24	-	-
Alternative 3' splice site	ENSG00000174177	CTU2	16:88778103:88778469:+	-	0.3	-	-	-	0.26	-	-
Alternative 3' splice site	ENSG00000198931	APRT	16:88876248:88876478:-	-0.12	-	-	-	-	-	-	-
Alternative 3' splice site	ENSG00000167515	TRAPPC2L	16:88925197:88925753:+	-	-	-	-	-	-	-	-0.14
Alternative 3' splice site	ENSG00000176715	ACSF3	16:89199670:89211622:+	-	-	-	-	-	0.13	-0.4	-0.41
Alternative 3' splice site	ENSG00000197912	SPG7	16:89619543:89620147:+	-	-	-	-	-	-	0.13	-
Alternative 3' splice site	ENSG00000131165	CHMP1A	16:89713141:89713611:-	-	-	-	-	-	-	0.13	-
Alternative 3' splice site	ENSG00000158805	ZNF276	16:89800446:89804129:+	-	-	-	-	-	0.16	-	-
Alternative 3' splice site	ENSG00000140995	DEF8	16:90021674:90023881:+	-	-	-	-	-	0.12	-	-
Alternative 3' splice site	ENSG00000223959	AFG3L1P	16:90045286:90045710:+	-	-	0.12	-	0.11	-	-	-
Alternative 3' splice site	ENSG00000141013	GAS8	16:90094130:90097584:+	0.19	0.17	-	0.37	-	-	-	-
Alternative 3' splice site	ENSG00000132376	INPP5K	17:1416855:1417166:-	-	-	-0.23	-	-	-	-	-
Alternative 3' splice site	ENSG00000132376	INPP5K	17:1416855:1417166:-	-	-	-0.21	-	-	-	-	-
Alternative 3' splice site	ENSG00000186594	MIR22HG	17:1616189:1616997:-	-	0.13	-	-	-	-	-	-
Alternative 3' splice site	ENSG00000166582	CENPV	17:16252647:16253245:-	-	-	-	-	-	-0.33	-0.23	-0.25
Alternative 3' splice site	ENSG00000141030	COPS3	17:17171359:17174072:-	-	-	-	-	-	-	-	-0.15
Alternative 3' splice site	ENSG00000171953	ATPAF2	17:17924977:17925059:-	-	-	-	-	-0.11	-	-	-0.11
Alternative 3' splice site	ENSG00000108591	DRG2	17:18003973:18004807:+	-	-0.11	-	-	-	-	-	-
Alternative 3' splice site	ENSG00000131899	LLGL1	17:18141528:18141770:+	-	-	-0.3	-	-0.18	-	-	-
Alternative 3' splice site	ENSG00000109084	TMEM97	17:26646391:26652529:+	-	-	-	-	0.1	-	-	-
Alternative 3' splice site	ENSG00000076604	TRAF4	17:27074282:27074840:+	-	-	0.23	0.26	-	-	0.37	-
Alternative 3' splice site	ENSG00000167549	CORO6	17:27945650:27945808:-	-	-	-	-	0.14	-	-	-
Alternative 3' splice site	ENSG00000132359	RAP1GAP2	17:2901670:2908635:+	-	-	-	-	-	-	0.13	-
Alternative 3' splice site	ENSG00000185128	TBC1D3F	17:36285864:36286965:+	-	0.15	-	-	-	0.22	-	-
Alternative 3' splice site	ENSG00000008838	MED24	17:38176263:38176526:-	-	-	0.11	-	-	-	-	-
Alternative 3' splice site	ENSG00000008838	MED24	17:38176735:38178208:-	-	0.13	-	-	-	0.14	-	-
Alternative 3' splice site	ENSG00000131473	ACLY	17:40070153:40075133:-	-0.13	-	-	-	-	-	-	-
Alternative 3' splice site	ENSG00000168259	DNAJC7	17:40147001:40148329:-	-	-	0.16	-	-	-	-	-
Alternative 3' splice site	ENSG00000168256	NKIRAS2	17:40172222:40173563:+	-	-	-	-	-	-	0.22	-
Alternative 3' splice site	ENSG00000167925	GHDC	17:40345119:40345335:-	-	-	-	-	-	0.16	-	-
Alternative 3' splice site	ENSG00000037042	TUBG2	17:40812725:40815395:+	-	-	-	-	-0.13	-	-	-
Alternative 3' splice site	ENSG00000108825	PTGES3L-AARSD1	17:41107384:41107859:-	-	-	-	-	-0.24	-	-0.39	-0.5
Alternative 3' splice site	ENSG00000168591	TMUB2	17:42265111:42266303:+	-0.17	-0.28	-	-	-0.19	0.22	-	-
Alternative 3' splice site	ENSG00000168591	TMUB2	17:42265377:42266303:+	-	-	-	-	-	0.24	0.27	-
Alternative 3' splice site	ENSG00000087152	ATXN7L3	17:42272526:42272787:-	0.13	-	-	-	-	-	-	-
Alternative 3' splice site	ENSG00000087152	ATXN7L3	17:42273253:42273402:-	-	-	-0.12	-	-	-	-	-
Alternative 3' splice site	ENSG00000087152	ATXN7L3	17:42273468:42273764:-	-	0.14	-	-	-0.15	-	-	-
Alternative 3' splice site	ENSG00000013306	SLC25A39	17:42399920:42400176:-	-	-	-	-	-	0.13	-	-
Alternative 3' splice site	ENSG00000013306	SLC25A39	17:42399920:42400652:-	-	-	-	-	-	0.23	-	-
Alternative 3' splice site	ENSG00000161692	DBF4B	17:42815792:42818704:+	-	-	-	-	-	0.11	-	-
Alternative 3' splice site	ENSG00000214447	FAM187A	17:42979020:42979686:+	-	-	-	-	-	0.26	-	-
Alternative 3' splice site	ENSG00000186185	KIF18B	17:43005946:43006187:-	-	-	-	-	-0.16	-	-	-
Alternative 3' splice site	ENSG00000161714	PLCD3	17:43192953:43193999:-	-	0.14	-	-	-	0.18	-0.21	-0.22
Alternative 3' splice site	ENSG00000004897	CDC27	17:45229302:45232038:-	-	-	-	-0.12	-	-	-	-
Alternative 3' splice site	ENSG00000004897	CDC27	17:45234490:45234596:-	-	-	-	-	-	-	-	-0.3
Alternative 3' splice site	ENSG00000141279	NPEPPS	17:45668247:45669270:+	-	-	-	-	0.14	-	-	-
Alternative 3' splice site	ENSG00000108819	PPP1R9B	17:48217724:48218634:-	-	0.16	-	-	-	0.3	0.11	-0.13
Alternative 3' splice site	ENSG00000108515	ENO3	17:4854477:4855016:+	-	-	-	-	-	0.12	0.16	-
Alternative 3' splice site	ENSG00000049283	EPN3	17:48616676:48617565:+	0.13	-	0.18	0.31	-	-	-	-
Alternative 3' splice site	ENSG00000091640	SPAG7	17:4863485:4863754:-	-	-	-	-	-	0.13	-	-
Alternative 3' splice site	ENSG00000108846	ABCC3	17:48735857:48736543:+	0.12	-	0.12	-	-	-	-	-
Alternative 3' splice site	ENSG00000167840	ZNF232	17:5009828:5012221:-	-	-	-	-	-	0.15	0.22	-
Alternative 3' splice site	ENSG00000108559	NUP88	17:5291272:5292122:-	-	-	-	0.21	-	-	0.14	-
Alternative 3' splice site	ENSG00000108559	NUP88	17:5291272:5292122:-	-	-	-	0.17	-	-	0.15	-
Alternative 3' splice site	ENSG00000121057	AKAP1	17:55196405:55197611:+	-	-	-	-	-	-0.16	-	-
Alternative 3' splice site	ENSG00000180891	CUEDC1	17:55940718:55943835:-	-	-	-	-	-	0.23	0.44	0.14
Alternative 3' splice site	ENSG00000261040	CTD-2319I12.1	17:58163487:58165558:-	-	-	-	-	-	-0.4	-	-
Alternative 3' splice site	ENSG00000136492	BRIP1	17:59938930:59940645:-	-	-0.19	-	-0.18	-	-	-	-
Alternative 3' splice site	ENSG00000011028	MRC2	17:60759298:60759417:+	-	-	-	-	-	0.57	-	-
Alternative 3' splice site	ENSG00000198909	MAP3K3	17:61767772:61768353:+	-	-	-	0.14	-	0.29	-	-
Alternative 3' splice site	ENSG00000266173	STRADA	17:61782268:61783995:-	0.15	-	-	-	0.14	-	0.21	0.11
Alternative 3' splice site	ENSG00000198231	DDX42	17:61877977:61882404:+	-	-	-	-	-	0.19	-	-
Alternative 3' splice site	ENSG00000136478	TEX2	17:62265796:62270919:-	-	0.14	0.14	-	-	-	-	-
Alternative 3' splice site	ENSG00000256525	POLG2	17:62479116:62481845:-	-	-	-	-	0.14	0.17	-	-
Alternative 3' splice site	ENSG00000258315	C17orf49	17:6920004:6920229:+	-	-	-	-	-	-	-	0.11
Alternative 3' splice site	ENSG00000258315	C17orf49	17:6920333:6920576:+	-0.18	-	-	-	-	-	-	-0.27
Alternative 3' splice site	ENSG00000166685	COG1	17:71189523:71192626:+	-	0.15	-	-	-	-	-	-
Alternative 3' splice site	ENSG00000215041	NEURL4	17:7221003:7221107:-	-	-	-	-	-	0.15	-	-
Alternative 3' splice site	ENSG00000109065	NAT9	17:72771991:72772406:-	-	-	-	-	-	0.18	0.34	-
Alternative 3' splice site	ENSG00000161513	FDXR	17:72861071:72861841:-	-	-	-	0.14	-	-	-	-
Alternative 3' splice site	ENSG00000125447	GGA3	17:73239339:73239528:-	-	-	-	0.12	-	-	0.24	-
Alternative 3' splice site	ENSG00000125445	MRPS7	17:73258064:73258544:+	-	-	-	-	-	0.16	-	-
Alternative 3' splice site	ENSG00000182173	TSEN54	17:73515128:73517436:+	-	-	-	-	-	0.2	-	-
Alternative 3' splice site	ENSG00000073350	LLGL2	17:73570061:73570192:+	-	-	-	-	-	0.13	-	-
Alternative 3' splice site	ENSG00000108469	RECQL5	17:73624905:73625014:-	-	-	-	-	0.18	-	-	-
Alternative 3' splice site	ENSG00000108469	RECQL5	17:73662700:73663124:-	-	-	-	-	0.32	-	-	-
Alternative 3' splice site	ENSG00000092929	UNC13D	17:73836448:73836588:-	-	-	-	-	0.27	-	-	-
Alternative 3' splice site	ENSG00000176170	SPHK1	17:74381735:74382024:+	-	-	-	-	-	-	0.23	-
Alternative 3' splice site	ENSG00000129667	RHBDF2	17:74476023:74477457:-	-	-	-	-	-0.28	0.27	-0.13	-
Alternative 3' splice site	ENSG00000070731	ST6GALNAC2	17:74564995:74566647:-	-	-	0.14	-	-	-	-	-
Alternative 3' splice site	ENSG00000167889	MGAT5B	17:74928857:74934064:+	-	-	-	-	0.27	0.16	0.24	-
Alternative 3' splice site	ENSG00000108639	SYNGR2	17:76164796:76166693:+	-	-	-	0.13	-	-	-	-
Alternative 3' splice site	ENSG00000187775	DNAH17	17:76421672:76422538:-	-	-	-	-	-	-	-	-0.17
Alternative 3' splice site	ENSG00000055483	USP36	17:76793984:76794482:-	-	-	-	0.2	-	-	-	-
Alternative 3' splice site	ENSG00000167291	TBC1D16	17:77923664:77924210:-	-	-	-	-	-	-	-0.28	-
Alternative 3' splice site	ENSG00000170004	CHD3	17:7797253:7797433:+	-0.16	0.17	-	-	-	-	-	-
Alternative 3' splice site	ENSG00000171298	GAA	17:78086510:78086644:+	0.13	-	-	-	-	-	-	-
Alternative 3' splice site	ENSG00000170037	CNTROB	17:7838463:7839556:+	-	-	-	-	-	-	-0.15	-0.2
Alternative 3' splice site	ENSG00000173818	ENDOV	17:78389621:78391581:+	-	-	0.14	-	-	-	-	-
Alternative 3' splice site	ENSG00000141577	AZI1	17:79165150:79166118:-	-	-	-	-	0.17	0.16	-	0.2
Alternative 3' splice site	ENSG00000214087	ARL16	17:79649705:79650043:-	-	-	0.39	0.25	-	-	0.16	-
Alternative 3' splice site	ENSG00000169683	LRRC45	17:79986559:79986895:+	-	-	-	-	-	0.39	-	-
Alternative 3' splice site	ENSG00000169738	DCXR	17:79994964:79995326:-	-	-	-	-	-	-	0.12	-
Alternative 3' splice site	ENSG00000178999	AURKB	17:8110252:8110636:-	-	-	-	-	-	0.54	0.5	-
Alternative 3' splice site	ENSG00000178999	AURKB	17:8111219:8113272:-	-	-	-	-	-	0.31	0.14	-
Alternative 3' splice site	ENSG00000166579	NDEL1	17:8339363:8347245:+	0.46	-	0.12	-	0.47	-	-	-
Alternative 3' splice site	ENSG00000101624	CEP76	18:12699202:12699829:-	-	-	-	-	-	0.19	-	-0.35
Alternative 3' splice site	ENSG00000141452	C18orf8	18:21110261:21110351:+	-	-	-	-	-	-	-	-0.16
Alternative 3' splice site	ENSG00000141458	NPC1	18:21136628:21137081:-	-	-	-	-	-0.23	-	-	-
Alternative 3' splice site	ENSG00000075643	MOCOS	18:33778719:33779646:+	-	-	-	-	-	-0.15	-	-
Alternative 3' splice site	ENSG00000141644	MBD1	18:47796188:47799047:-	-	-	-	-	-0.2	-0.25	-	-
Alternative 3' splice site	ENSG00000141644	MBD1	18:47799841:47799934:-	-	0.36	-	0.36	-0.12	-	-	-
Alternative 3' splice site	ENSG00000066926	FECH	18:55238835:55240478:-	-	0.14	-	0.14	-	0.17	-	-
Alternative 3' splice site	ENSG00000134440	NARS	18:55283254:55287801:-	0.11	-	-	-	-	-	-	-
Alternative 3' splice site	ENSG00000182087	TMEM259	19:1011662:1011740:-	-0.22	-	-0.24	-	-0.25	-	-	-
Alternative 3' splice site	ENSG00000130811	EIF3G	19:10229931:10230330:-	-	-	-	-	-	0.17	-	-
Alternative 3' splice site	ENSG00000064666	CNN2	19:1032695:1036066:+	-	-	0.12	-	-	-	-	-
Alternative 3' splice site	ENSG00000105364	MRPL4	19:10362986:10363040:+	-	-	-	-	0.11	0.14	0.14	-
Alternative 3' splice site	ENSG00000267673	FDX1L	19:10426229:10426381:-	-	-	0.2	0.32	-	0.12	0.2	-
Alternative 3' splice site	ENSG00000130734	ATG4D	19:10655001:10655385:+	-	0.19	-	-	-	-	-	-
Alternative 3' splice site	ENSG00000142453	CARM1	19:11030356:11030509:+	-	-	-	0.12	-	-	-	-
Alternative 3' splice site	ENSG00000127616	SMARCA4	19:11150229:11151974:+	-	-0.3	-	-	-	-	-	-
Alternative 3' splice site	ENSG00000130164	LDLR	19:11238761:11240127:+	-	-	-	-	-	-	0.15	-
Alternative 3' splice site	ENSG00000130158	DOCK6	19:11313391:11314757:-	-	0.13	-	-	-	-	-	-
Alternative 3' splice site	ENSG00000105518	TMEM205	19:11456413:11456684:-	-	-	-0.12	-0.17	-	-	-	-0.29
Alternative 3' splice site	ENSG00000105520	DKFZP761J1410	19:11467652:11468295:+	-	0.17	0.21	-	-	-	-	-
Alternative 3' splice site	ENSG00000105520	DKFZP761J1410	19:11468415:11470208:+	0.11	-	-	-	-	-	-	-
Alternative 3' splice site	ENSG00000130175	PRKCSH	19:11558433:11558508:+	-	-	-	-	-	-	0.1	-
Alternative 3' splice site	ENSG00000099625	C19orf26	19:1234330:1234570:-	-	-	-	-	0.38	-	-	0.24
Alternative 3' splice site	ENSG00000099625	C19orf26	19:1235341:1235500:-	-	-	-	-	-0.5	-	-	-
Alternative 3' splice site	ENSG00000099622	CIRBP	19:1269409:1270866:+	-	-	0.12	-	-	-	-	-
Alternative 3' splice site	ENSG00000099622	CIRBP	19:1269409:1270866:+	-	-	0.12	-	-	-	-	-
Alternative 3' splice site	ENSG00000099622	CIRBP	19:1271035:1271120:+	-	-	-	-	0.34	-	0.58	0.12
Alternative 3' splice site	ENSG00000123154	WDR83	19:12781099:12781333:+	0.11	0.14	-	-	-	-	0.23	-
Alternative 3' splice site	ENSG00000123154	WDR83	19:12781425:12781509:+	-	-	-	-	-	-	0.16	0.2
Alternative 3' splice site	ENSG00000095059	DHPS	19:12790844:12790975:-	-	-	-	-	-	0.12	0.23	-
Alternative 3' splice site	ENSG00000132004	FBXW9	19:12801014:12801980:-	-	-	-	0.13	-	0.26	-	-
Alternative 3' splice site	ENSG00000105576	TNPO2	19:12812991:12813637:-	-0.12	-	-	-	-	-	-	-
Alternative 3' splice site	ENSG00000105576	TNPO2	19:12816644:12817010:-	-	-	0.14	-	-	0.11	-	-
Alternative 3' splice site	ENSG00000123136	DDX39A	19:14520793:14521028:-	-	0.2	-	0.22	-	0.23	0.1	-0.21
Alternative 3' splice site	ENSG00000123136	DDX39A	19:14523523:14523825:-	-	-	-	0.11	-	-	-	-
Alternative 3' splice site	ENSG00000185761	ADAMTSL5	19:1508907:1510149:-	-	-	-	-	-0.15	-	-	-
Alternative 3' splice site	ENSG00000085872	CHERP	19:16641724:16643409:-	-0.11	-	-	0.15	-	-	-	0.13
Alternative 3' splice site	ENSG00000105393	BABAM1	19:17378336:17379449:+	-	-	-	-	0.13	-	-	-
Alternative 3' splice site	ENSG00000105393	BABAM1	19:17378336:17379565:+	-	-	0.16	-	-	-	-	-
Alternative 3' splice site	ENSG00000105393	BABAM1	19:17387718:17389305:+	-	-	-	-	0.14	-	-	-
Alternative 3' splice site	ENSG00000074855	ANO8	19:17440350:17440566:-	0.16	-	0.29	-	-	-	-	-
Alternative 3' splice site	ENSG00000130299	GTPBP3	19:17448473:17448683:+	-	-	-	-	-	0.55	-	-
Alternative 3' splice site	ENSG00000130299	GTPBP3	19:17449550:17449763:+	-	-	-	-	-0.13	-	-	-
Alternative 3' splice site	ENSG00000079313	REXO1	19:1817457:1817706:-	-	-	-	-	-	0.33	0.21	-
Alternative 3' splice site	ENSG00000079313	REXO1	19:1820179:1820263:-	-	0.23	-	-	-	0.28	-	-
Alternative 3' splice site	ENSG00000079313	REXO1	19:1820412:1821518:-	-	-	-	-	-	-	0.15	-
Alternative 3' splice site	ENSG00000105647	PIK3R2	19:18274198:18276921:+	-	-	-	-	-	0.12	-	-
Alternative 3' splice site	ENSG00000006015	C19orf60	19:18700493:18701084:+	-	-	-	-	-	-	0.14	-
Alternative 3' splice site	ENSG00000005007	UPF1	19:18971247:18971436:+	-	-	-	-	-	0.34	-	-
Alternative 3' splice site	ENSG00000105671	DDX49	19:19035508:19035662:+	-	-	0.14	-	0.39	0.16	0.22	-
Alternative 3' splice site	ENSG00000105705	SUGP1	19:19414852:19416658:-	0.15	-	-	-	-	-	-	-
Alternative 3' splice site	ENSG00000167491	GATAD2A	19:19496947:19576149:+	-	-	0.14	-	-	-	-	-
Alternative 3' splice site	ENSG00000105726	ATP13A1	19:19764953:19765352:-	-	-	-	-0.1	-	0.12	-	-
Alternative 3' splice site	ENSG00000099875	MKNK2	19:2039855:2040133:-	-	-	-	-	-	-	0.16	-
Alternative 3' splice site	ENSG00000065000	AP3D1	19:2112966:2113335:-	-	-	-	-	-	0.14	-	-
Alternative 3' splice site	ENSG00000141934	PPAP2C	19:288189:291285:-	-	0.15	-	0.21	-	-	-	-
Alternative 3' splice site	ENSG00000153885	KCTD15	19:34302457:34302696:+	0.18	0.17	-	-	-	0.16	-	-
Alternative 3' splice site	ENSG00000161265	U2AF1L4	19:36235639:36236026:-	-	-	-	0.26	-	-	0.11	-
Alternative 3' splice site	ENSG00000161265	U2AF1L4	19:36235882:36236026:-	-	-	0.17	0.17	-	-	-	-
Alternative 3' splice site	ENSG00000075702	WDR62	19:36593053:36593639:+	-	0.22	-	-	-	-	-	-
Alternative 3' splice site	ENSG00000007264	MATK	19:3783295:3783812:-	-	-	-	-	-	0.11	0.33	-
Alternative 3' splice site	ENSG00000104825	NFKBIB	19:39390851:39395655:+	-	-	-	-	-0.15	-	-	-
Alternative 3' splice site	ENSG00000105221	AKT2	19:40741374:40741797:-	-	-	-	-	-	0.21	-	-
Alternative 3' splice site	ENSG00000160410	SHKBP1	19:41083536:41084029:+	-	-	-	0.11	-	-	-	-
Alternative 3' splice site	ENSG00000105323	HNRNPUL1	19:41810166:41811551:+	-	-	-	-	-	0.18	-	-
Alternative 3' splice site	ENSG00000076928	ARHGEF1	19:42409413:42409742:+	-	0.12	-	-	-	-	-	-
Alternative 3' splice site	ENSG00000176531	PHLDB3	19:43999772:44001270:-	-	0.15	-	-	-	0.19	-	-
Alternative 3' splice site	ENSG00000104859	CLASRP	19:45572506:45573202:+	-	0.14	-	-	-	0.34	-	-
Alternative 3' splice site	ENSG00000125755	SYMPK	19:46357843:46366316:-	-	-	-	-	-	0.13	-	-
Alternative 3' splice site	ENSG00000090372	STRN4	19:47230824:47231151:-	-	-	0.17	-	-	-	0.25	-
Alternative 3' splice site	ENSG00000090372	STRN4	19:47230948:47231151:-	-	-	-	-	-	-	-	-0.13
Alternative 3' splice site	ENSG00000090372	STRN4	19:47231383:47231875:-	-	-	-	-	-	0.27	-	-
Alternative 3' splice site	ENSG00000105419	MEIS3	19:47910823:47912356:-	-	0.15	0.14	-	-	-	-	-
Alternative 3' splice site	ENSG00000105443	CYTH2	19:48976635:48976979:+	-	-	0.14	-	-	0.32	0.19	-
Alternative 3' splice site	ENSG00000104812	GYS1	19:49494795:49496252:-	0.12	-	-	-	-	-	-	-
Alternative 3' splice site	ENSG00000104872	PIH1D1	19:49954196:49954742:-	-	-	0.27	-	-0.28	-	-0.33	-0.35
Alternative 3' splice site	ENSG00000126456	IRF3	19:50164101:50165205:-	-	-	-	-	-	0.16	-	-
Alternative 3' splice site	ENSG00000104946	TBC1D17	19:50391091:50391414:+	-	-	-	-	0.3	0.26	-	-0.15
Alternative 3' splice site	ENSG00000104951	IL4I1	19:50431105:50432583:-	-0.21	-	-	-	-	-	-	-
Alternative 3' splice site	ENSG00000062822	POLD1	19:50910672:50911964:+	-	-	-	-	-	0.2	-	-
Alternative 3' splice site	ENSG00000179820	MYADM	19:54371197:54372944:+	-	-	-	-	-	0.23	0.14	-
Alternative 3' splice site	ENSG00000179820	MYADM	19:54371197:54372944:+	-	-	-	-	-	0.24	0.13	-
Alternative 3' splice site	ENSG00000088038	CNOT3	19:54648068:54649278:+	-	0.15	-	-	-	-	-	-0.14
Alternative 3' splice site	ENSG00000088038	CNOT3	19:54656736:54657234:+	-	-	-	0.12	-	-	0.17	-
Alternative 3' splice site	ENSG00000088038	CNOT3	19:54657577:54658996:+	-	0.24	-	0.19	-	0.21	-	-
Alternative 3' splice site	ENSG00000105048	TNNT1	19:55645572:55648471:-	-	-	0.12	-	-	-	-	-
Alternative 3' splice site	ENSG00000063245	EPN1	19:56186801:56189873:+	-	-	-	0.11	-	-	-	-
Alternative 3' splice site	ENSG00000141994	DUS3L	19:5786930:5787072:-	-	-	-	-	-0.17	-	0.18	-0.28
Alternative 3' splice site	ENSG00000198131	ZNF544	19:58757793:58758077:+	-	-	-0.28	-	-	-	-	-
Alternative 3' splice site	ENSG00000083838	ZNF446	19:58989548:58991010:+	-	-	-	-	-	-0.19	-	-
Alternative 3' splice site	ENSG00000099821	POLRMT	19:617870:618488:-	-	-	0.21	-	-	-	0.2	-
Alternative 3' splice site	ENSG00000070423	RNF126	19:649052:649679:-	-	-	-	-	-0.3	0.24	-	-0.19
Alternative 3' splice site	ENSG00000070423	RNF126	19:651915:652233:-	-	-	-	-	-	0.32	-	-
Alternative 3' splice site	ENSG00000125731	SH2D3A	19:6755326:6759605:-	0.24	-	-	-	-	-	-	-
Alternative 3' splice site	ENSG00000104880	ARHGEF18	19:7460133:7505075:+	-	-	-	-	-	0.2	0.4	-
Alternative 3' splice site	ENSG00000032444	PNPLA6	19:7600463:7600675:+	-	-	-	-	0.17	-	-	-
Alternative 3' splice site	ENSG00000032444	PNPLA6	19:7619961:7620135:+	-	-	-0.19	-	-	-	-	-
Alternative 3' splice site	ENSG00000076984	MAP2K7	19:7976215:7976300:+	-	-	-	-	-	-	0.19	-
Alternative 3' splice site	ENSG00000175221	MED16	19:890423:890963:-	-	-	-	-	0.13	-	-	-
Alternative 3' splice site	ENSG00000130803	ZNF317	19:9268070:9268510:+	-	-	-	-	-	0.16	-	-
Alternative 3' splice site	ENSG00000170485	NPAS2	2:101609989:101611862:+	-	-	-	-	-	0.16	-	-0.16
Alternative 3' splice site	ENSG00000135953	MFSD9	2:103340368:103343304:-	-	-	0.14	-	-	-	-	-
Alternative 3' splice site	ENSG00000163161	ERCC3	2:128047095:128047265:-	-	-	-	-	-	0.11	-	-
Alternative 3' splice site	ENSG00000136699	SMPD4	2:130914386:130914824:-	-	-	-	-	-	0.26	-	-
Alternative 3' splice site	ENSG00000144228	SPOPL	2:139308174:139308473:+	-	-	-0.15	-	-	-	-	-
Alternative 3' splice site	ENSG00000153234	NR4A2	2:157182840:157183230:-	-	-	0.38	-	-	-	-	-
Alternative 3' splice site	ENSG00000144283	PKP4	2:159477933:159481390:+	-	-	-	-	-	0.14	0.14	-
Alternative 3' splice site	ENSG00000138381	ASNSD1	2:190528680:190530102:+	-	-	-	-	0.13	-	-	-
Alternative 3' splice site	ENSG00000003402	CFLAR	2:202025665:202027719:+	-	-	-	0.13	-	-	-	-
Alternative 3' splice site	ENSG00000138443	ABI2	2:204276094:204281631:+	-	-	-	-	-	-	-	0.17
Alternative 3' splice site	ENSG00000163466	ARPC2	2:219081977:219082095:+	-	-	-	-	-	0.21	-	-
Alternative 3' splice site	ENSG00000115568	ZNF142	2:219521195:219523424:-	-	-	0.18	-	-	-	-	-
Alternative 3' splice site	ENSG00000163481	RNF25	2:219530807:219530882:-	-	-	-	0.18	-	-	-	-
Alternative 3' splice site	ENSG00000115661	STK16	2:220110807:220111244:+	0.28	0.3	0.42	0.48	-	0.41	0.35	-
Alternative 3' splice site	ENSG00000115661	STK16	2:220110807:220111244:+	0.28	0.29	0.4	0.46	-	0.41	0.35	-
Alternative 3' splice site	ENSG00000123992	DNPEP	2:220251702:220251792:-	-	-	-	-	-	-	-	-0.19
Alternative 3' splice site	ENSG00000153827	TRIP12	2:230670599:230672424:-	-	-	-	0.14	-	-	-	-
Alternative 3' splice site	ENSG00000167165	UGT1A6	2:234600466:234602335:+	-	0.11	0.16	0.18	-	-	-	-
Alternative 3' splice site	ENSG00000184182	UBE2F	2:238903451:238925175:+	-	-	-	0.19	-	-	-	-
Alternative 3' splice site	ENSG00000142330	CAPN10	2:241534721:241535351:+	-	-	-	-	-	-	-	-0.15
Alternative 3' splice site	ENSG00000115677	HDLBP	2:242175044:242176030:-	-	-	-	-0.12	-	-	-	-
Alternative 3' splice site	ENSG00000168385	2018-09-02	2:242263656:242265382:+	-	-	-	-	-	0.22	-	-
Alternative 3' splice site	ENSG00000168385	2018-09-02	2:242263656:242265382:+	-	-	-	-	-	0.18	-	-
Alternative 3' splice site	ENSG00000138092	CENPO	2:25037362:25038366:+	-	-	-	-	-	-	-	-0.2
Alternative 3' splice site	ENSG00000138092	CENPO	2:25038625:25039515:+	-	-	-	-	-	-	-0.31	-0.12
Alternative 3' splice site	ENSG00000119772	DNMT3A	2:25464646:25466767:-	-	-	-	0.11	-	-	-	-
Alternative 3' splice site	ENSG00000115163	CENPA	2:27015108:27015370:+	-	-	-	0.12	0.42	0.28	0.34	-
Alternative 3' splice site	ENSG00000115211	EIF2B4	2:27590162:27590324:-	-	-	0.17	-	-	-	-	-
Alternative 3' splice site	ENSG00000119760	SUPT7L	2:27884468:27885046:-	-	-	0.22	0.31	-	0.17	-	-
Alternative 3' splice site	ENSG00000119760	SUPT7L	2:27884468:27885046:-	-	0.17	0.2	0.3	-	0.12	-	-
Alternative 3' splice site	ENSG00000075426	FOSL2	2:28631733:28634746:+	-	-	-	-	-	0.11	-	-
Alternative 3' splice site	ENSG00000171853	TRAPPC12	2:3461464:3464016:+	-	0.15	-	-	-	-	-	-
Alternative 3' splice site	ENSG00000171865	RNASEH1	2:3596314:3596648:-	-	-	-	-	0.14	-	0.15	0.14
Alternative 3' splice site	ENSG00000055332	EIF2AK2	2:37376400:37384051:-	-	-	0.13	-	-	-	-	-
Alternative 3' splice site	ENSG00000119787	ATL2	2:38523732:38525286:-	0.12	0.24	0.21	-	-	0.15	0.17	-
Alternative 3' splice site	ENSG00000162878	PKDCC	2:42282160:42282333:+	-	-	-	-	-	0.28	-	-
Alternative 3' splice site	ENSG00000059728	MXD1	2:70162597:70164151:+	0.12	0.14	0.18	0.15	0.14	0.18	-	-
Alternative 3' splice site	ENSG00000115274	INO80B	2:74682301:74682518:+	0.13	0.24	-	-	-	-	-	-
Alternative 3' splice site	ENSG00000115307	AUP1	2:74754248:74754375:-	-	0.15	-	-	-	-	-	-
Alternative 3' splice site	ENSG00000115307	AUP1	2:74754983:74755067:-	-	-	-	0.11	-	-	-	-
Alternative 3' splice site	ENSG00000115317	HTRA2	2:74758498:74758694:+	-	-	-	-	-	-	0.13	-
Alternative 3' splice site	ENSG00000132300	PTCD3	2:86360559:86361415:+	-	-	-	-	-	0.15	-	-
Alternative 3' splice site	ENSG00000132305	IMMT	2:86398468:86400773:-	-	0.1	-	-	-0.21	-	-0.13	-
Alternative 3' splice site	ENSG00000151694	ADAM17	2:9666393:9667915:-	-	-	-	-0.12	-	-	-	-
Alternative 3' splice site	ENSG00000135956	TMEM127	2:96931250:96931607:-	-	-	-	-	-	-0.22	-	-
Alternative 3' splice site	ENSG00000196843	ARID5A	2:97215542:97215763:+	-	-	-	-	-	0.28	-	-
Alternative 3' splice site	ENSG00000114982	KANSL3	2:97297280:97302658:-	-0.22	-0.14	-	-	-	-	-	-
Alternative 3' splice site	ENSG00000115446	UNC50	2:99232996:99234609:+	-	-	-	-	-	0.14	-	-
Alternative 3' splice site	ENSG00000132640	BTBD3	20:11871602:11898426:+	-0.13	-	-	-	-	-	0.17	-
Alternative 3' splice site	ENSG00000101247	NDUFAF5	20:13765936:13767824:+	-	0.18	-	0.12	-	0.19	-	-
Alternative 3' splice site	ENSG00000101247	NDUFAF5	20:13769298:13773806:+	-	-	-	-	-	0.18	-	-
Alternative 3' splice site	ENSG00000197586	ENTPD6	20:25204793:25205798:+	-	0.12	-	0.12	-	0.2	-	-
Alternative 3' splice site	ENSG00000101361	NOP56	20:2634039:2635035:+	-	-	0.12	0.17	-	-	0.22	-
Alternative 3' splice site	ENSG00000101361	NOP56	20:2635593:2635884:+	-	-	-	0.12	-	-	-	-
Alternative 3' splice site	ENSG00000101365	IDH3B	20:2640608:2640676:-	0.11	-	-	0.13	-	-	-	-
Alternative 3' splice site	ENSG00000171552	BCL2L1	20:30310151:30310421:-	-0.21	-	-0.18	-	-0.18	0.13	-	-0.27
Alternative 3' splice site	ENSG00000171552	BCL2L1	20:30310151:30311538:-	-0.22	-	-	-	-	-	-	-0.15
Alternative 3' splice site	ENSG00000088305	DNMT3B	20:31384675:31384747:+	-	-	-	-	0.15	-	-	-
Alternative 3' splice site	ENSG00000100991	TRPC4AP	20:33595670:33596467:-	-	0.11	-	-	-	0.15	-	-
Alternative 3' splice site	ENSG00000100991	TRPC4AP	20:33609159:33622926:-	-	-	-	-	-	0.13	-0.16	-0.15
Alternative 3' splice site	ENSG00000088298	EDEM2	20:33730300:33732782:-	-	-	0.18	0.17	-	-	-	-
Alternative 3' splice site	ENSG00000061656	SPAG4	20:34207668:34208579:+	-	-	-	-	-	0.46	0.55	-
Alternative 3' splice site	ENSG00000214078	CPNE1	20:34214748:34215202:-	-	-	-	-	-	0.17	-0.19	-0.18
Alternative 3' splice site	ENSG00000196756	RP4-564F22.2	20:37050888:37054583:-	-	-	-	-	-	-	0.41	-
Alternative 3' splice site	ENSG00000196756	RP4-564F22.2	20:37054700:37055062:-	-	-	-	-	-	-	-	-0.15
Alternative 3' splice site	ENSG00000196756	RP4-564F22.2	20:37054700:37055062:-	-	-	-	-	-	-	0.2	-
Alternative 3' splice site	ENSG00000174365	SNHG11	20:37077373:37078905:+	0.24	0.2	-	0.33	0.19	0.13	0.23	-
Alternative 3' splice site	ENSG00000101452	DHX35	20:37612419:37617436:+	-	-	-	-	-	-	-	-0.2
Alternative 3' splice site	ENSG00000124181	PLCG1	20:39788793:39791014:+	-	-	-	-	-	0.18	-	-
Alternative 3' splice site	ENSG00000101104	PABPC1L	20:43552897:43559101:+	-	-	-	-	-	0.2	-	-
Alternative 3' splice site	ENSG00000204070	SYS1	20:43992333:43994187:+	-	-	-	0.37	-	-	0.12	-
Alternative 3' splice site	ENSG00000204070	SYS1	20:43992333:43994187:+	-	-	-	0.37	-	-	0.11	-
Alternative 3' splice site	ENSG00000101473	ACOT8	20:44472411:44472902:-	-	0.17	-	-	-0.12	-	-0.27	-0.24
Alternative 3' splice site	ENSG00000080189	SLC35C2	20:44983918:44984441:-	0.13	0.19	-	0.18	-	0.15	-	-
Alternative 3' splice site	ENSG00000101040	ZMYND8	20:45927691:45938800:-	-	0.18	-	-	-	-	-	-
Alternative 3' splice site	ENSG00000101040	ZMYND8	20:45927691:45938800:-	-	0.16	-	0.15	-	-	-	-
Alternative 3' splice site	ENSG00000124207	CSE1L	20:47711500:47712713:+	-	0.37	-	-	-	0.44	-	-0.13
Alternative 3' splice site	ENSG00000124214	STAU1	20:47741142:47752370:-	-	-	-	-	-	0.21	-	-
Alternative 3' splice site	ENSG00000124201	ZNFX1	20:47892424:47894558:-	-	-0.2	-	-	-	-	-	-
Alternative 3' splice site	ENSG00000184402	SS18L1	20:60718945:60733624:+	-	0.21	0.25	0.23	-	-	-	-
Alternative 3' splice site	ENSG00000101189	MRGBP	20:61430020:61430205:+	-	0.11	-	-	0.14	0.24	0.13	-
Alternative 3' splice site	ENSG00000101199	ARFGAP1	20:61917065:61917718:+	-0.13	-	-	-	-0.35	-	-	-
Alternative 3' splice site	ENSG00000101216	GMEB2	20:62234445:62236096:-	-	-	-0.19	-	-	-	-	-
Alternative 3' splice site	ENSG00000258366	RTEL1	20:62293296:62293749:+	-	-	-	-	-	-	0.6	-
Alternative 3' splice site	ENSG00000258366	RTEL1	20:62293296:62293749:+	-	-	0.31	-	-	-	0.63	-
Alternative 3' splice site	ENSG00000101246	ARFRP1	20:62332106:62333182:-	-	-	-	0.22	0.23	0.18	-	-
Alternative 3' splice site	ENSG00000197114	ZGPAT	20:62365091:62365997:+	-	0.13	-	0.11	-	0.27	-	-
Alternative 3' splice site	ENSG00000198276	UCKL1	20:62575269:62575750:-	-	0.16	0.14	-	-	-	-	-
Alternative 3' splice site	ENSG00000156304	SCAF4	21:33057553:33057711:-	-	-	-	-	-	0.12	-	-
Alternative 3' splice site	ENSG00000159110	IFNAR2	21:34633032:34634866:+	-	-	-	-	-	0.22	-	-
Alternative 3' splice site	ENSG00000159140	SON	21:34948199:34948671:+	-	0.13	-	-	-	-	-0.12	-0.19
Alternative 3' splice site	ENSG00000157538	DSCR3	21:38604946:38605663:-	-	-	-	-	-	0.12	0.12	-
Alternative 3' splice site	ENSG00000160294	MCM3AP	21:47697756:47699907:-	-	0.11	-	-	-	0.14	-	-
Alternative 3' splice site	ENSG00000160298	C21orf58	21:47737262:47737926:-	-	-	-	-	-0.4	-	-	-
Alternative 3' splice site	ENSG00000160310	PRMT2	21:48068531:48069425:+	-	-	-	-	-	0.11	-	-
Alternative 3' splice site	ENSG00000206195	AP000525.8	22:16187302:16189032:-	-	-	-	-	0.13	0.11	-	-
Alternative 3' splice site	ENSG00000093010	COMT	22:19948812:19949756:+	-	-	-	-	-	0.21	-	-
Alternative 3' splice site	ENSG00000093010	COMT	22:19948812:19949756:+	-	-	-	-	-	0.21	-	-
Alternative 3' splice site	ENSG00000099899	TRMT2A	22:20101084:20101209:-	-	-	-	-	-	-	0.28	-
Alternative 3' splice site	ENSG00000215513	PI4KAP1	22:20388671:20389095:-	-0.26	-	-	-	-	-	-	-
Alternative 3' splice site	ENSG00000241973	PI4KA	22:21063787:21064196:-	-	-	-	-	-	0.16	-	-
Alternative 3' splice site	ENSG00000241973	PI4KA	22:21065749:21066774:-	-	-	-0.12	-	-	-	-	-
Alternative 3' splice site	ENSG00000183506	PI4KAP2	22:21841264:21841854:-	-	-	-	-	-	0.27	-	-
Alternative 3' splice site	ENSG00000100038	TOP3B	22:22317392:22318295:-	-	0.11	-	-	-	0.16	-	-
Alternative 3' splice site	ENSG00000236850	LL22NC03-80A10.6	22:22658479:22661155:+	-	0.32	0.29	-	-	-	-	-
Alternative 3' splice site	ENSG00000185686	PRAME	22:22899506:22899965:-	-	-	-	-	-	-	0.11	-
Alternative 3' splice site	ENSG00000250479	CHCHD10	22:24109780:24110021:-	-	-	-	-	-0.29	-	-	-
Alternative 3' splice site	ENSG00000099958	DERL3	22:24179149:24179251:-	-	-	-	-	0.44	-	0.52	0.43
Alternative 3' splice site	ENSG00000100031	GGT1	22:25006000:25006217:+	-	-	-	-	-0.28	-	-	-
Alternative 3' splice site	ENSG00000100031	GGT1	22:25006303:25006381:+	-	-	-	-	-	0.26	-	0.27
Alternative 3' splice site	ENSG00000100031	GGT1	22:25019883:25023377:+	-	-	-	-	-	0.31	-	-
Alternative 3' splice site	ENSG00000242114	MTFP1	22:30822832:30823109:+	-0.12	-	-	-	-	-	0.15	-
Alternative 3' splice site	ENSG00000183963	SMTN	22:31491595:31491838:+	-	-	-	0.18	-	0.11	0.24	-
Alternative 3' splice site	ENSG00000100284	TOM1	22:35729007:35729168:+	-	-	-	-	-	0.13	-0.13	-0.11
Alternative 3' splice site	ENSG00000100320	RBFOX2	22:36156079:36157249:-	-	-	-	-	-	0.18	0.16	-
Alternative 3' splice site	ENSG00000198792	TMEM184B	22:38627405:38641941:-	-	0.13	-	-	-	0.11	-	-
Alternative 3' splice site	ENSG00000100211	CBY1	22:39064137:39066772:+	-	-	-	-	-	0.14	-0.19	-0.31
Alternative 3' splice site	ENSG00000100316	RPL3	22:39713026:39713466:-	-	-	-	-	-0.11	-	-0.12	-0.12
Alternative 3' splice site	ENSG00000100335	SMCR7L	22:39908031:39908237:+	0.23	-	-	-	-	-	-	-
Alternative 3' splice site	ENSG00000239900	ADSL	22:40756496:40757092:+	0.12	0.18	-	-	-	-	-	-
Alternative 3' splice site	ENSG00000100359	SGSM3	22:40805022:40805254:+	-	-	-	-	-0.12	-	-	-
Alternative 3' splice site	ENSG00000100401	RANGAP1	22:41677216:41680905:-	0.12	-	-	-	-	-	-	-
Alternative 3' splice site	ENSG00000100344	PNPLA3	22:44319978:44322815:+	-	-	-	-	-	-	-	0.23
Alternative 3' splice site	ENSG00000241484	ARHGAP8	22:45122514:45127559:+	-	-	-	-	-	0.19	-	-
Alternative 3' splice site	ENSG00000100425	BRD1	22:50181535:50187682:-	-	-	-	-	-	-	-	-0.32
Alternative 3' splice site	ENSG00000182858	ALG12	22:50298154:50301369:-	-	-	-	-	-	-	-	0.2
Alternative 3' splice site	ENSG00000073169	RP3-402G11.5	22:50644949:50646917:+	-	-	-	-	-	0.23	-	-
Alternative 3' splice site	ENSG00000081154	PCNP	3:101293123:101295295:+	-	-	-	-	-0.39	-	-	-
Alternative 3' splice site	ENSG00000081154	PCNP	3:101293123:101298433:+	-	-	0.12	-	-	-	-	-
Alternative 3' splice site	ENSG00000138459	SLC35A5	3:112299553:112300026:+	-	-	-	-	0.21	-	-	0.19
Alternative 3' splice site	ENSG00000065485	PDIA5	3:122864439:122864946:+	-	-	0.11	-	-	-	0.16	-
Alternative 3' splice site	ENSG00000144713	RPL32	3:12881852:12882993:-	-	-	-	-	-	-	0.11	-
Alternative 3' splice site	ENSG00000144713	RPL32	3:12882591:12882993:-	-	-	-	-	-	-	0.13	-
Alternative 3' splice site	ENSG00000017260	ATP2C1	3:130613181:130613434:+	0.23	-	0.21	-	-	-	-	-
Alternative 3' splice site	ENSG00000017260	ATP2C1	3:130613181:130613434:+	0.23	-	0.2	-	-	-	-	-
Alternative 3' splice site	ENSG00000091527	CDV3	3:133305566:133306003:+	-	-	-	-	-0.12	0.21	0.11	-
Alternative 3' splice site	ENSG00000163781	TOPBP1	3:133371473:133372189:-	-	-	-0.18	-	-	-	-	-
Alternative 3' splice site	ENSG00000163785	RYK	3:133910827:133913926:-	-0.24	-0.17	-	-	-	-	0.21	-
Alternative 3' splice site	ENSG00000174564	IL20RB	3:136677043:136699173:+	-	-	-	-	-	-	-	-0.11
Alternative 3' splice site	ENSG00000070087	PFN2	3:149684373:149686145:-	-	-	0.17	0.13	-	-0.25	-	0.16
Alternative 3' splice site	ENSG00000131370	SH3BP5	3:15345806:15372011:-	-	-	-	-	-	-	0.15	-
Alternative 3' splice site	ENSG00000131373	HACL1	3:15614766:15616484:-	-	0.15	-	-	-	-	-	-
Alternative 3' splice site	ENSG00000163584	RPL22L1	3:170585990:170586087:-	-	0.11	-	-	-0.31	0.13	-0.35	-0.39
Alternative 3' splice site	ENSG00000114770	ABCC5	3:183689822:183695305:-	-0.12	-	-0.11	-	-	-	-	-
Alternative 3' splice site	ENSG00000161203	AP2M1	3:183898039:183898630:+	-	-	-	-	0.13	-	-	-
Alternative 3' splice site	ENSG00000161204	ABCF3	3:183904663:183905152:+	-	-	0.11	-	-	-	0.28	-
Alternative 3' splice site	ENSG00000114859	CLCN2	3:184073632:184074781:-	-	-	-	-	0.17	-	-	-
Alternative 3' splice site	ENSG00000156976	EIF4A2	3:186505053:186505197:+	-	-	0.23	0.15	-	-	0.3	-
Alternative 3' splice site	ENSG00000156976	EIF4A2	3:186505053:186505268:+	-	-	-	-	-	0.12	-	-
Alternative 3' splice site	ENSG00000242086	AC069513.3	3:195385036:195388104:+	-	-	0.64	0.36	-	-	0.42	-
Alternative 3' splice site	ENSG00000185485	SDHAP1	3:195692448:195694385:-	-	-	-	-	-	0.34	-	-
Alternative 3' splice site	ENSG00000185485	SDHAP1	3:195709223:195710983:-	-	-	-	-	-	-	0.18	-
Alternative 3' splice site	ENSG00000161217	PCYT1A	3:195974514:195975078:-	-	-	-	-	-	0.26	-	-
Alternative 3' splice site	ENSG00000077097	TOP2B	3:25686961:25705720:-	-	0.22	-	-	-	-	-	-
Alternative 3' splice site	ENSG00000170248	PDCD6IP	3:33868072:33870330:+	-	0.2	0.37	0.16	-	-	-	-
Alternative 3' splice site	ENSG00000168036	CTNNB1	3:41280845:41281151:+	-	-	0.14	0.12	-	-	0.14	-
Alternative 3' splice site	ENSG00000093183	SEC22C	3:42605472:42610357:-	-0.17	-	-	-	-	-	-	-
Alternative 3' splice site	ENSG00000178038	ALS2CL	3:46713258:46713374:-	-	-	-	-	-	0.28	-	-
Alternative 3' splice site	ENSG00000172113	NME6	3:48337726:48338217:-	0.27	-	0.49	-	-	0.15	-	-0.14
Alternative 3' splice site	ENSG00000172113	NME6	3:48337726:48338217:-	0.26	-	0.48	-	-	0.13	-	-0.15
Alternative 3' splice site	ENSG00000164051	CCDC51	3:48475386:48476227:-	-	-	-	-	0.14	-	-	-
Alternative 3' splice site	ENSG00000164054	SHISA5	3:48510585:48510760:-	-	-	-	-	-	-0.14	-	-
Alternative 3' splice site	ENSG00000114270	COL7A1	3:48605665:48605932:-	-	-	-	-	-	0.14	-	-
Alternative 3' splice site	ENSG00000008300	CELSR3	3:48669234:48669313:-	-	-	-	-	-	0.14	-	-
Alternative 3' splice site	ENSG00000213672	NCKIPSD	3:48719589:48719781:-	-	-	-	0.21	-	0.18	-	-
Alternative 3' splice site	ENSG00000172046	USP19	3:49155263:49155380:-	-	0.23	-	-	-	-	-0.16	-
Alternative 3' splice site	ENSG00000183763	TRAIP	3:49881450:49881974:-	-	-	-	-	-	0.13	-	-0.24
Alternative 3' splice site	ENSG00000114395	CYB561D2	3:50388415:50388774:+	-0.11	-	-	-	-	-	-	-
Alternative 3' splice site	ENSG00000114735	HEMK1	3:50609232:50609508:+	-	-	-	-	-	-0.17	-	-
Alternative 3' splice site	ENSG00000163930	BAP1	3:52436956:52437154:-	-	-	-	-	-	0.11	-	-
Alternative 3' splice site	ENSG00000163946	FAM208A	3:56657871:56658507:-	-	-	-	-	-0.22	-0.17	-0.22	-0.24
Alternative 3' splice site	ENSG00000169855	ROBO1	3:78685258:78688894:-	-	-	-0.22	-	-	-	-	-
Alternative 3' splice site	ENSG00000206538	VGLL3	3:87027952:87039768:-	-	-	-	-	-	0.19	0.21	-
Alternative 3' splice site	ENSG00000134077	THUMPD3	3:9405016:9406700:+	0.15	0.14	0.17	-	-	-	-	-
Alternative 3' splice site	ENSG00000168137	SETD5	3:9475634:9475961:+	0.14	0.21	-	0.15	-	0.19	-	-
Alternative 3' splice site	ENSG00000057019	DCBLD2	3:98519602:98520444:-	-	-	-	-	-0.11	-	-	-
Alternative 3' splice site	ENSG00000163702	IL17RC	3:9959418:9959548:+	-	-	-	-	0.26	0.23	-	-
Alternative 3' splice site	ENSG00000109332	UBE2D3	4:103748001:103748584:-	-	0.24	0.24	-	-	0.28	0.29	-
Alternative 3' splice site	ENSG00000109332	UBE2D3	4:103748001:103748584:-	-	0.23	0.25	-	-	0.27	0.29	-
Alternative 3' splice site	ENSG00000109332	UBE2D3	4:103748001:103748749:-	-	0.17	-	-	-	0.13	0.16	-
Alternative 3' splice site	ENSG00000109332	UBE2D3	4:103748001:103749101:-	-	0.19	0.24	0.12	-	-	0.1	-
Alternative 3' splice site	ENSG00000151729	SLC25A4	4:186066404:186066509:+	-	-	-	-	-0.14	-0.13	-0.13	-0.14
Alternative 3' splice site	ENSG00000109685	WHSC1	4:1952930:1953726:+	-	-	-	-	-	0.25	-	-
Alternative 3' splice site	ENSG00000109685	WHSC1	4:1957576:1957710:+	-	-	-0.22	-	-	-	-	-
Alternative 3' splice site	ENSG00000197386	HTT	4:3208710:3209008:+	-	-	-	-	-	-	0.15	0.14
Alternative 3' splice site	ENSG00000090989	EXOC1	4:56757588:56758781:+	-0.16	-	-	-	-	-	-	-
Alternative 3' splice site	ENSG00000128059	PPAT	4:57272867:57273816:-	-	-	-	-	-	-0.19	-	-
Alternative 3' splice site	ENSG00000083896	YTHDC1	4:69184471:69184544:-	-0.17	-	-0.15	-	-	-	-	-
Alternative 3' splice site	ENSG00000185619	PCGF3	4:727578:727673:+	-	0.21	0.32	0.27	-	0.39	0.34	-
Alternative 3' splice site	ENSG00000132466	ANKRD17	4:74013163:74014530:-	-0.12	-	-0.11	-	-	-	-	-
Alternative 3' splice site	ENSG00000125089	SH3TC1	4:8233883:8234135:+	-	-	-	-	-	0.54	-	-
Alternative 3' splice site	ENSG00000152795	HNRPDL	4:83349354:83349431:-	-	-	0.12	-	-	-	-	-
Alternative 3' splice site	ENSG00000178950	GAK	4:844197:844724:-	-	-	-	0.24	-	0.12	0.36	-
Alternative 3' splice site	ENSG00000178950	GAK	4:860322:860744:-	-0.31	-	-	-	-	-0.36	-	-
Alternative 3' splice site	ENSG00000118777	ABCG2	4:89034705:89036109:-	0.2	0.24	0.27	-	-	-	-	-
Alternative 3' splice site	ENSG00000153037	SRP19	5:112200429:112203069:+	-	0.14	-	-	-0.14	0.26	-0.13	-
Alternative 3' splice site	ENSG00000133835	HSD17B4	5:118810155:118811373:+	-	-	-	-0.11	-	-	-	0.14
Alternative 3' splice site	ENSG00000155324	GRAMD3	5:125759381:125801069:+	-	-	-	-	-0.16	-	-	-
Alternative 3' splice site	ENSG00000164904	ALDH7A1	5:125929139:125930699:-	-	-	-0.15	-	-	-0.11	-	-
Alternative 3' splice site	ENSG00000125347	IRF1	5:131823744:131825084:-	-	-	-	0.15	-	-	-	-
Alternative 3' splice site	ENSG00000164402	2018-09-08	5:132099584:132099916:-	-0.14	-	-	-0.33	-	-	-	-
Alternative 3' splice site	ENSG00000113013	HSPA9	5:137909858:137910927:-	-	-	-	-	-	-	0.11	-
Alternative 3' splice site	ENSG00000015479	MATR3	5:138658656:138660985:+	-	-	-	0.18	0.23	-	0.29	-
Alternative 3' splice site	ENSG00000184584	TMEM173	5:138858789:138860375:-	-	-	-	-	-	-	0.11	-
Alternative 3' splice site	ENSG00000131503	ANKHD1	5:139815842:139818046:+	-	-	-	-	-	-0.12	-	-0.26
Alternative 3' splice site	ENSG00000131503	ANKHD1	5:139865317:139866543:+	-	-	-0.22	-	-	-	-	-
Alternative 3' splice site	ENSG00000131503	ANKHD1	5:139915123:139916923:+	-0.13	-	-	-	-	-	-	-0.18
Alternative 3' splice site	ENSG00000213523	SRA1	5:139936917:139937013:-	0.16	-	-	-	0.25	0.23	-	-
Alternative 3' splice site	ENSG00000131495	NDUFA2	5:140025310:140026841:-	-	-	-	-	-	-	-	-0.12
Alternative 3' splice site	ENSG00000145907	G3BP1	5:151151597:151166133:+	0.23	0.25	-	-	-	0.13	-	-
Alternative 3' splice site	ENSG00000113282	CLINT1	5:157216575:157218711:-	-	-	-	-	-	0.34	0.16	-
Alternative 3' splice site	ENSG00000048162	NOP16	5:175813944:175815236:-	-	-	-	-	-	-	0.13	-
Alternative 3' splice site	ENSG00000146083	RNF44	5:175958022:175958464:-	-0.12	-	-	-	-	-	-	-
Alternative 3' splice site	ENSG00000146083	RNF44	5:175959194:175959367:-	-	0.32	0.17	-	-	-	-	-
Alternative 3' splice site	ENSG00000113761	ZNF346	5:176471534:176477704:+	-	0.28	-	-	-	0.57	-	-
Alternative 3' splice site	ENSG00000198055	GRK6	5:176853898:176857677:+	-	-	-	-	-	0.14	-	-
Alternative 3' splice site	ENSG00000196923	PDLIM7	5:176917594:176917871:-	-	-	-	-	0.22	0.15	0.14	-
Alternative 3' splice site	ENSG00000183258	DDX41	5:176943517:176943726:-	-	-	-	0.14	-	-	-	-0.12
Alternative 3' splice site	ENSG00000169045	HNRNPH1	5:179050188:179050596:-	-	-	0.15	-	-	-	0.12	-
Alternative 3' splice site	ENSG00000161011	SQSTM1	5:179248141:179249889:+	-	-	-	-	0.12	-	-	-
Alternative 3' splice site	ENSG00000161011	SQSTM1	5:179248141:179249889:+	-	-	-	-	0.13	-	-	-
Alternative 3' splice site	ENSG00000073578	SDHA	5:240591:254473:+	-	-	-	-	-	0.11	-	-
Alternative 3' splice site	ENSG00000073578	SDHA	5:251583:254473:+	-	-	-	-	-	0.11	-	-
Alternative 3' splice site	ENSG00000082213	C5orf22	5:31536000:31538367:+	-	-	-	-	-	0.18	0.24	-
Alternative 3' splice site	ENSG00000145604	SKP2	5:36177394:36181920:+	-	-	-	-	0.16	-0.11	-	-0.17
Alternative 3' splice site	ENSG00000153914	SREK1	5:65459750:65460436:+	-	-	-	0.21	-	-	-	-
Alternative 3' splice site	ENSG00000145675	PIK3R1	5:67591316:67591975:+	-	0.14	-	-	-	-	-	-
Alternative 3' splice site	ENSG00000113048	MRPS27	5:71519743:71521884:-	-	-	-	-	-0.12	-	-	-
Alternative 3' splice site	ENSG00000124279	FASTKD3	5:7861886:7862936:-	-	-	-	-	-	-	-	-0.15
Alternative 3' splice site	ENSG00000145687	SSBP2	5:80762884:80769519:-	-0.18	-	-	-	-	-	-	-
Alternative 3' splice site	ENSG00000028310	BRD9	5:869519:870588:-	-	-	-	-	-0.3	-	-	-
Alternative 3' splice site	ENSG00000028310	BRD9	5:886882:887476:-	-	-	-	-	-	0.18	-	-
Alternative 3' splice site	ENSG00000028310	BRD9	5:889881:891270:-	-	-	-	-	-0.21	-	-	-0.17
Alternative 3' splice site	ENSG00000025796	SEC63	6:108224202:108225833:-	-	-	-	-	-	-	-	0.14
Alternative 3' splice site	ENSG00000135587	SMPD2	6:109762831:109763163:+	-	-	-	-	-	-	-	-0.17
Alternative 3' splice site	ENSG00000123505	AMD1	6:111214030:111214076:+	-	-	-	-	-0.18	-0.17	-	-
Alternative 3' splice site	ENSG00000029363	BCLAF1	6:136599914:136600901:-	-	-	-	-0.13	-	-	-	-
Alternative 3' splice site	ENSG00000029639	TFB1M	6:155581702:155606292:-	-	-	-	-	-	-	-	-0.19
Alternative 3' splice site	ENSG00000112531	QKI	6:163983101:163984452:+	-	-0.12	-	-	-	-	-	-
Alternative 3' splice site	ENSG00000130024	PHF10	6:170118002:170118884:-	-	-	-	-	0.13	-	-	-
Alternative 3' splice site	ENSG00000124532	MRS2	6:24418464:24418599:+	-	0.14	-	-	-	-	-	-
Alternative 3' splice site	ENSG00000186470	BTN3A2	6:26375026:26375743:+	-	-	-	-	-	0.19	-	-
Alternative 3' splice site	ENSG00000124508	BTN2A2	6:26391057:26392450:+	-	-	-	-	-	-	0.62	-
Alternative 3' splice site	ENSG00000112763	BTN2A1	6:26466316:26467947:+	-	0.24	-	0.18	-	0.39	0.33	-
Alternative 3' splice site	ENSG00000234127	TRIM26	6:30167041:30168812:-	-	-	0.14	0.17	-	-	-	-
Alternative 3' splice site	ENSG00000241370	RPP21	6:30313175:30313244:+	-	-	-	-	-	-	0.13	-
Alternative 3' splice site	ENSG00000204592	HLA-E	6:30457772:30458017:+	-	-	-	-	-	-	0.12	0.11
Alternative 3' splice site	ENSG00000204580	DDR1	6:30864918:30865138:+	-	-	-	-	-	-	0.11	-
Alternative 3' splice site	ENSG00000137411	VARS2	6:30886692:30887501:+	-	-	-	-	-	0.24	-	-
Alternative 3' splice site	ENSG00000198563	DDX39B	6:31498726:31498830:-	-	-	-	-	-	-	0.12	-
Alternative 3' splice site	ENSG00000198563	DDX39B	6:31508441:31509727:-	-	-	-	0.32	-	-	0.31	0.21
Alternative 3' splice site	ENSG00000204469	PRRC2A	6:31588635:31590467:+	0.12	0.17	-0.14	-	-	-	-	-0.21
Alternative 3' splice site	ENSG00000204463	BAG6	6:31615621:31616454:-	-	-	-	0.17	-	-	-	-
Alternative 3' splice site	ENSG00000204394	VARS	6:31759868:31759994:-	-	-	-	-	-	0.14	-	-
Alternative 3' splice site	ENSG00000204371	EHMT2	6:31852832:31854358:-	-	0.18	-	0.16	-	0.2	-	-
Alternative 3' splice site	ENSG00000204356	NELFE	6:31922669:31922836:-	-	-	0.16	-	-	-0.2	-	-
Alternative 3' splice site	ENSG00000204356	NELFE	6:31922669:31922836:-	-	-	0.16	-	-	-0.19	-	-
Alternative 3' splice site	ENSG00000204351	SKIV2L	6:31934918:31935004:+	-	-	-	-	-	-	0.15	-
Alternative 3' splice site	ENSG00000204351	SKIV2L	6:31936315:31936400:+	-	0.17	-	-	-0.11	-	-	-0.12
Alternative 3' splice site	ENSG00000204348	DOM3Z	6:31938602:31938689:-	-	-	-	-	0.32	0.18	0.38	0.31
Alternative 3' splice site	ENSG00000204348	DOM3Z	6:31939502:31939706:-	-	-	0.4	-	-	-	0.32	-
Alternative 3' splice site	ENSG00000204256	BRD2	6:32944713:32945037:+	-	0.32	0.15	0.17	-0.13	0.38	-	-0.12
Alternative 3' splice site	ENSG00000204231	RXRB	6:33163243:33163347:-	-	-	-	-	-	0.16	-	-
Alternative 3' splice site	ENSG00000112473	SLC39A7	6:33168715:33168971:+	-	0.16	-	-	-	-	-	-
Alternative 3' splice site	ENSG00000237441	RGL2	6:33261712:33261811:-	-0.19	-	-	-	-	-	-	-
Alternative 3' splice site	ENSG00000204209	DAXX	6:33289785:33290639:-	-	0.12	-	-	-	-	0.18	-
Alternative 3' splice site	ENSG00000065029	ZNF76	6:35259514:35260317:+	-	-	-	-	-	-	-	-0.12
Alternative 3' splice site	ENSG00000096063	SRPK1	6:35858818:35888245:-	-	-	-	-	-	-	0.19	-
Alternative 3' splice site	ENSG00000112130	RNF8	6:37328350:37336154:+	-	-	-	-	-	0.41	0.15	-
Alternative 3' splice site	ENSG00000001167	NFYA	6:41058048:41059267:+	0.19	-	0.18	-	-	-0.27	-	-
Alternative 3' splice site	ENSG00000137166	FOXP4	6:41557592:41557701:+	-	-0.18	-	-	-	-	-	-
Alternative 3' splice site	ENSG00000112578	BYSL	6:41899294:41899442:+	-	-	-	-	-	-	0.14	-
Alternative 3' splice site	ENSG00000124496	TRERF1	6:42200666:42203943:-	-	-	-	-	-	0.33	0.2	0.24
Alternative 3' splice site	ENSG00000137161	CNPY3	6:42902336:42903150:+	-	-	-	-	-0.13	-	-	-
Alternative 3' splice site	ENSG00000137221	TJAP1	6:43465715:43466661:+	-	-	-	-	-	0.43	-	-0.11
Alternative 3' splice site	ENSG00000137221	TJAP1	6:43465715:43466661:+	-	-	-	-	-	0.53	-	-
Alternative 3' splice site	ENSG00000137207	YIPF3	6:43483928:43484465:-	-	-	-	0.11	-	0.13	-	-0.17
Alternative 3' splice site	ENSG00000181577	C6orf223	6:43968437:43968711:+	-	-	-	-	-	-	-	0.22
Alternative 3' splice site	ENSG00000168566	SNRNP48	6:7595334:7599906:+	-	-	-	-	0.2	-	-	-
Alternative 3' splice site	ENSG00000128563	PRKRIP1	7:102004858:102006402:+	-	-	-	-	0.16	-	-	-
Alternative 3' splice site	ENSG00000161036	LRWD1	7:102113251:102113329:+	-	-	-	-	0.13	-	0.13	-
Alternative 3' splice site	ENSG00000228049	POLR2J2	7:102307711:102309362:-	-	-	-	-	-	-	0.35	-
Alternative 3' splice site	ENSG00000236753	AC018642.1	7:131011694:131012374:-	-	-	-	-	-	-0.23	-	-
Alternative 3' splice site	ENSG00000157800	SLC37A3	7:140051981:140055468:-	-	-	-	-	-	0.15	-	-0.15
Alternative 3' splice site	ENSG00000181220	ZNF746	7:149191206:149191295:-	0.19	0.35	-	-	-	-	-	-0.13
Alternative 3' splice site	ENSG00000214022	REPIN1	7:150066957:150067803:+	-	0.15	0.32	0.34	0.27	0.25	0.65	0.15
Alternative 3' splice site	ENSG00000184863	RBM33	7:155499762:155503867:+	-	0.22	0.21	-	-0.3	-	-	-
Alternative 3' splice site	ENSG00000164855	TMEM184A	7:1590031:1590453:-	-	-	0.16	-	-	-	-	-
Alternative 3' splice site	ENSG00000164548	TRA2A	7:23562051:23571408:-	-	-	-	-	-	-	-0.12	-0.12
Alternative 3' splice site	ENSG00000106263	EIF3B	7:2419146:2419839:+	-	0.13	-	-	-	-	-	-0.13
Alternative 3' splice site	ENSG00000106009	BRAT1	7:2579541:2580613:-	-	0.19	-	0.22	-	0.33	-	-
Alternative 3' splice site	ENSG00000106009	BRAT1	7:2581256:2581352:-	-	-	-	-	-	0.17	-	-
Alternative 3' splice site	ENSG00000065883	CDK13	7:40127930:40132384:+	-	0.17	-	-	-	0.4	-	-
Alternative 3' splice site	ENSG00000136280	CCM2	7:45112382:45112840:+	-	-	-	-	-	0.22	-	-
Alternative 3' splice site	ENSG00000242802	AP5Z1	7:4829560:4829845:+	-	-	0.25	0.49	0.4	0.37	0.73	0.37
Alternative 3' splice site	ENSG00000242802	AP5Z1	7:4829560:4829845:+	-	-	0.33	0.62	0.44	0.55	0.76	0.44
Alternative 3' splice site	ENSG00000196204	RNF216P1	7:5024706:5028665:+	-	-	-	-	-	0.13	-	-
Alternative 3' splice site	ENSG00000106078	COBL	7:51093069:51094243:-	-	-	-	-0.27	-	-	-	-
Alternative 3' splice site	ENSG00000011275	RNF216	7:5779256:5780604:-	0.42	-	-	-	-	-	-	-
Alternative 3' splice site	ENSG00000011275	RNF216	7:5781446:5792477:-	-	-	-	-	-	-	0.34	-
Alternative 3' splice site	ENSG00000136247	ZDHHC4	7:6617351:6618132:+	-0.15	-	-	-	-	0.13	-	-
Alternative 3' splice site	ENSG00000067601	PMS2P4	7:66760963:66762204:-	0.41	-	-	-	-	-	-	-0.29
Alternative 3' splice site	ENSG00000067601	PMS2P4	7:66760963:66762204:-	0.38	-	-	-	-	-	-	-0.28
Alternative 3' splice site	ENSG00000106635	BCL7B	7:72952568:72954212:-	-	-	-	0.13	-	0.13	-	-
Alternative 3' splice site	ENSG00000106638	TBL2	7:72989134:72992750:-	-	-	0.3	0.23	0.23	0.12	0.22	-
Alternative 3' splice site	ENSG00000049541	RFC2	7:73663550:73664069:-	-	-	-	-	-	-	-	-0.11
Alternative 3' splice site	ENSG00000049541	RFC2	7:73664159:73666759:-	-	-	-	-	-	0.12	-	-
Alternative 3' splice site	ENSG00000006704	GTF2IRD1	7:73927301:73929675:+	-	-	-	-	0.18	0.29	-	-
Alternative 3' splice site	ENSG00000006704	GTF2IRD1	7:73969553:73969723:+	-	-	-	-	-	0.12	-	-
Alternative 3' splice site	ENSG00000123965	PMS2P5	7:74312628:74313593:+	-	-0.23	-	-	-	-	-	-
Alternative 3' splice site	ENSG00000242073	AC006014.7	7:75113596:75115141:-	-	-	-	-	-	-	-	-0.61
Alternative 3' splice site	ENSG00000091073	DTX2	7:76093026:76106260:+	-	-	-	-	-	0.23	-	-
Alternative 3' splice site	ENSG00000075303	SLC25A40	7:87485704:87487946:-	-	-	0.19	-	-	-	-	-
Alternative 3' splice site	ENSG00000234545	FAM133B	7:92207031:92207464:-	-	-	-	-	0.32	-	0.33	-
Alternative 3' splice site	ENSG00000234545	FAM133B	7:92207031:92207464:-	-	-	-	-	0.24	-	0.23	-
Alternative 3' splice site	ENSG00000105854	PON2	7:95035584:95036299:-	-	-	-	0.14	-	-	-	-
Alternative 3' splice site	ENSG00000070669	ASNS	7:97484066:97484665:-	-	0.22	-	-	-0.16	0.43	-0.23	-0.24
Alternative 3' splice site	ENSG00000198742	SMURF1	7:98630744:98633138:-	-	-	-	-0.35	-	-	-	-
Alternative 3' splice site	ENSG00000160917	CPSF4	7:99050063:99051589:+	-	-	-	-	-	0.14	-	-
Alternative 3' splice site	ENSG00000106246	PTCD1	7:99057846:99063752:-	-	-	-	-	0.16	-	-	-
Alternative 3' splice site	ENSG00000198556	ZNF789	7:99074103:99075897:+	-	-	-	-	0.58	-	0.69	0.45
Alternative 3' splice site	ENSG00000166997	CNPY4	7:99720529:99722055:+	-	-	-	-	-	0.13	-	-
Alternative 3' splice site	ENSG00000146826	C7orf43	7:99753554:99754009:-	-	-	-	-	-	0.24	-	-
Alternative 3' splice site	ENSG00000078319	PMS2P1	7:99923491:99926459:-	-	-	-	-	0.12	-	-	-
Alternative 3' splice site	ENSG00000121716	PILRB	7:99943591:99947354:+	-	0.14	-	-	-	-	-	-
Alternative 3' splice site	ENSG00000121716	PILRB	7:99952863:99954017:+	0.2	-	0.19	0.16	0.45	0.14	0.37	0.22
Alternative 3' splice site	ENSG00000104517	UBR5	8:103354912:103357624:-	-0.23	-	-	-	-	-	-	-
Alternative 3' splice site	ENSG00000160886	LY6K	8:143783131:143784262:+	-	-	-	-	-	-	0.35	-
Alternative 3' splice site	ENSG00000250571	GLI4	8:144351690:144356874:+	0.19	-	-	-	-	-	-	-
Alternative 3' splice site	ENSG00000104522	TSTA3	8:144698610:144698737:-	-	-	0.11	0.18	-	-	0.23	-
Alternative 3' splice site	ENSG00000179832	MROH1	8:145296420:145297114:+	-	0.12	-	-	-	-	-	-
Alternative 3' splice site	ENSG00000182325	FBXL6	8:145580209:145580260:-	-	-	-	-	0.28	0.3	0.32	-
Alternative 3' splice site	ENSG00000071894	CPSF1	8:145619268:145619328:-	-	0.13	-	-	0.12	0.17	-	-
Alternative 3' splice site	ENSG00000104613	INTS10	8:19675177:19675705:+	-	0.14	0.31	0.26	-	-	0.49	-
Alternative 3' splice site	ENSG00000168487	BMP1	8:22034163:22034437:+	-0.21	-	-0.38	-	-0.25	-0.28	-0.37	-0.24
Alternative 3' splice site	ENSG00000168487	BMP1	8:22053100:22053694:+	-	-	-	-	-	-	-0.21	-0.15
Alternative 3' splice site	ENSG00000168487	BMP1	8:22054933:22058631:+	-	-	0.21	-	-	-	-	0.14
Alternative 3' splice site	ENSG00000168487	BMP1	8:22054933:22058631:+	-	-	0.2	-	-	-	-	0.14
Alternative 3' splice site	ENSG00000168078	PBK	8:27668684:27678082:-	-	-	-	-	-	0.14	-	-
Alternative 3' splice site	ENSG00000169490	TM2D2	8:38853313:38853732:-	-	-	-	-	-	-	-	-0.3
Alternative 3' splice site	ENSG00000169490	TM2D2	8:38853313:38853732:-	-	-	-	-	-	0.16	-	-0.2
Alternative 3' splice site	ENSG00000158669	AGPAT6	8:41469792:41470305:+	-	-	-	-	-	0.14	-	-
Alternative 3' splice site	ENSG00000170791	CHCHD7	8:57127226:57128948:+	-0.17	-	-	-	-	-	-	-
Alternative 3' splice site	ENSG00000066777	ARFGEF1	8:68117054:68123718:-	-0.19	-	-	-	-	-	-	-
Alternative 3' splice site	ENSG00000205133	TRIQK	8:93898963:93904217:-	-	0.11	0.12	0.12	-	-	-	-
Alternative 3' splice site	ENSG00000164920	OSR2	8:99962983:99963747:+	-	0.15	-	-	-	-	0.29	-
Alternative 3' splice site	ENSG00000119431	HDHD3	9:116137847:116139009:-	-0.16	-	-	-	-	0.23	-	-
Alternative 3' splice site	ENSG00000148218	ALAD	9:116154615:116155727:-	0.2	-	-	-	0.27	0.38	-	-
Alternative 3' splice site	ENSG00000157693	C9orf91	9:117379581:117386416:+	0.16	0.18	0.38	0.37	-	-	-	-
Alternative 3' splice site	ENSG00000119402	FBXW2	9:123550556:123555165:-	-	-	-	-	-0.37	-0.29	-	-
Alternative 3' splice site	ENSG00000119402	FBXW2	9:123550556:123555427:-	-	-	-	-0.13	-	-	0.32	0.19
Alternative 3' splice site	ENSG00000136848	DAB2IP	9:124533003:124534886:+	-	-	-	-	-	-	0.12	-
Alternative 3' splice site	ENSG00000136856	SLC2A8	9:130165032:130165939:+	-	-	-	-0.28	-	-	-	-
Alternative 3' splice site	ENSG00000106992	AK1	9:130635459:130636890:-	-	0.12	-	-	-	-	-	-
Alternative 3' splice site	ENSG00000136840	ST6GALNAC4	9:130672807:130674547:-	-	0.43	-	-	-	0.34	-	-
Alternative 3' splice site	ENSG00000175854	SWI5	9:131038681:131038866:+	-	-	0.11	-	-	-	-	-
Alternative 3' splice site	ENSG00000160446	ZDHHC12	9:131485018:131486273:-	-	-	-	-	-	0.15	-	-
Alternative 3' splice site	ENSG00000198917	C9orf114	9:131591156:131591389:-	-	-	-	-	-	-	0.22	-
Alternative 3' splice site	ENSG00000130714	POMT1	9:134393924:134394085:+	0.15	0.19	-	0.12	0.16	0.17	-	-
Alternative 3' splice site	ENSG00000130717	UCK1	9:134406074:134406454:-	-	-	-	-	-	0.17	-	-
Alternative 3' splice site	ENSG00000160271	RALGDS	9:135985108:135985683:-	-	-	-	-0.21	-	-	-	-
Alternative 3' splice site	ENSG00000148296	SURF6	9:136200678:136201228:-	-	-	0.12	-	-	-	-	-
Alternative 3' splice site	ENSG00000169925	BRD3	9:136901713:136905156:-	-	-	0.12	-	-	-	-	-
Alternative 3' splice site	ENSG00000160345	C9orf116	9:138387461:138390431:-	-	-	0.17	0.15	-	-	-	-
Alternative 3' splice site	ENSG00000122140	MRPS2	9:138392969:138393545:+	-	-	-	0.11	-	0.14	0.17	-
Alternative 3' splice site	ENSG00000127191	TRAF2	9:139814967:139815470:+	-	-	0.11	-	-	-	-	-
Alternative 3' splice site	ENSG00000159069	FBXW5	9:139837455:139837801:-	-	-	0.24	0.12	-	0.12	0.27	-
Alternative 3' splice site	ENSG00000188566	NDOR1	9:140110469:140110519:+	-	0.18	-	-	-	-	-	-
Alternative 3' splice site	ENSG00000197070	ARRDC1	9:140508221:140508389:+	-	-	0.11	0.12	-	0.13	0.25	-
Alternative 3' splice site	ENSG00000181090	EHMT1	9:140622981:140637823:+	-	-	-0.17	-	-	0.2	0.19	0.19
Alternative 3' splice site	ENSG00000122729	ACO1	9:32434699:32436002:+	-	0.27	-	-	-	-	-	-
Alternative 3' splice site	ENSG00000137074	APTX	9:32973686:32974456:-	-	0.16	0.18	-	-	0.11	-	-
Alternative 3' splice site	ENSG00000137074	APTX	9:32987844:32988081:-	-	-	0.22	-	-	0.17	0.23	-
Alternative 3' splice site	ENSG00000213930	GALT	9:34647958:34648045:+	-	-	-	-	-	-	-	-0.12
Alternative 3' splice site	ENSG00000221829	FANCG	9:35075751:35075959:-	-	-	-	-	-	-	-	0.12
Alternative 3' splice site	ENSG00000198467	TPM2	9:35682901:35684243:-	-	0.17	-	-	-	-	-	-
Alternative 3' splice site	ENSG00000070610	GBA2	9:35737601:35737745:-	-	-	0.16	0.33	0.37	-	0.47	-
Alternative 3' splice site	ENSG00000120158	RCL1	9:4793227:4823531:+	-	0.11	-	-	-	-	-	-
Alternative 3' splice site	ENSG00000119125	GDA	9:74764598:74810416:+	-	-	-	-	-	-	0.11	-
Alternative 3' splice site	ENSG00000165119	HNRNPK	9:86584355:86585077:-	-	0.13	-	0.21	-0.14	0.25	-	-
Alternative 3' splice site	ENSG00000187742	SECISBP2	9:91934712:91940342:+	-0.11	-	-	-	-	-	-	-
Alternative 3' splice site	ENSG00000187742	SECISBP2	9:91947901:91949437:+	-	-	-0.24	-0.15	-	-	-	-
Alternative 3' splice site	ENSG00000166681	NGFRAP1	X:102632034:102632391:+	-	-	-	-	-	0.12	-	-
Alternative 3' splice site	ENSG00000133142	TCEAL4	X:102840552:102840787:+	-	-	-	-	-	-	0.28	-
Alternative 3' splice site	ENSG00000133142	TCEAL4	X:102840611:102840898:+	-	-	-	-	-	-	0.21	-
Alternative 3' splice site	ENSG00000123562	MORF4L2	X:102933579:102939609:-	-	-	-	-	-	0.16	-	-
Alternative 3' splice site	ENSG00000175556	LONRF3	X:118145936:118146843:+	-	-	-	-	-	0.17	-	-
Alternative 3' splice site	ENSG00000125676	THOC2	X:122753368:122754758:-	0.12	0.34	0.16	0.39	-	-	-	-
Alternative 3' splice site	ENSG00000101911	PRPS2	X:12817509:12827351:+	-	0.13	-	-	-	-	-	-
Alternative 3' splice site	ENSG00000123595	RAB9A	X:13707407:13721854:+	-	-	-	-	-	0.23	-	-0.12
Alternative 3' splice site	ENSG00000102081	FMR1	X:147024846:147026389:+	-	-	-	-	-	0.14	-	-
Alternative 3' splice site	ENSG00000102081	FMR1	X:147024846:147026389:+	-	-	-	-	-	0.11	-	-
Alternative 3' splice site	ENSG00000221867	MAGEA3	X:151936441:151938163:-	-	-	-	-	-	0.47	-	-
Alternative 3' splice site	ENSG00000147382	FAM58A	X:152853912:152857964:-	-	-	-	0.19	-0.13	0.18	-	-
Alternative 3' splice site	ENSG00000067829	IDH3G	X:153051464:153051667:-	-	-	-	0.11	-	0.11	-	-
Alternative 3' splice site	ENSG00000172534	HCFC1	X:153218541:153219058:-	-	-	-	-	-	0.22	0.26	-
Alternative 3' splice site	ENSG00000102178	UBL4A	X:153714422:153714567:-	-	-	0.35	0.29	-	-	-	-
Alternative 3' splice site	ENSG00000071889	FAM3A	X:153736213:153736620:-	-	-	-	-	-	0.15	-	-
Alternative 3' splice site	ENSG00000071889	FAM3A	X:153736216:153736620:-	-	0.14	0.18	-	-	0.12	-	-
Alternative 3' splice site	ENSG00000184831	APOO	X:23851729:23858430:-	-	-	-	-	-	0.14	-	-
Alternative 3' splice site	ENSG00000183337	BCOR	X:39923205:39923589:-	-	-	-	-	-	0.26	-	-0.19
Alternative 3' splice site	ENSG00000124486	USP9X	X:41010310:41012186:+	-0.16	-	-	-	-	-	-	-
Alternative 3' splice site	ENSG00000147044	CASK	X:41646538:41712368:-	0.17	-	-	-	-	-	-	-
Alternative 3' splice site	ENSG00000078061	ARAF	X:47420650:47422081:+	-	-	0.14	-	-	-	-	-
Alternative 3' splice site	ENSG00000078061	ARAF	X:47424538:47424642:+	-	-	-	-	0.11	-	-	-
Alternative 3' splice site	ENSG00000101940	WDR13	X:48456425:48457105:+	-	-	-0.19	-0.16	-	-0.16	-	-
Alternative 3' splice site	ENSG00000102103	PQBP1	X:48758578:48759075:+	-	-	-	-	0.11	-	-	-
Alternative 3' splice site	ENSG00000068323	TFE3	X:48896935:48897982:-	-	-	-	-	-0.18	-0.17	-0.14	-
Alternative 3' splice site	ENSG00000068323	TFE3	X:48896935:48897982:-	-	-	-	-	-0.17	-0.18	-0.14	-
Alternative 3' splice site	ENSG00000196998	WDR45	X:48933637:48934089:-	-	-	0.18	-	-	-	-	-
Alternative 3' splice site	ENSG00000179304	FAM156B	X:52927752:52928085:+	-	-	-	-	-	0.36	-	-
Alternative 3' splice site	ENSG00000184205	TSPYL2	X:53112487:53113714:+	-	-	-	-	-0.14	-	-0.17	-0.16
Alternative 3' splice site	ENSG00000147130	ZMYM3	X:70471100:70471408:-	-	-	-	0.12	-	-	0.16	-
Alternative 3' splice site	ENSG00000102309	PIN4	X:71401678:71406084:+	-	-	-	0.19	-0.29	-	-0.38	-
Alternative 3' splice site	ENSG00000134243	SORT1	1:109888503:109890105:-	-	-	-0.12	-	-	-	-	-
Alternative 3' splice site	ENSG00000143093	STRIP1	1:110577439:110580510:+	-0.15	-	-	-0.13	-	-	-	-
Alternative 3' splice site	ENSG00000143061	IGSF3	1:117149173:117150564:-	-	-	-	-	-	-	-0.12	-
Alternative 3' splice site	ENSG00000116830	TTF2	1:117618916:117619260:+	-	-	0.22	-	-	-	-	-
Alternative 3' splice site	ENSG00000231360	AL592284.1	1:144340398:144520644:+	-	-	0.22	0.19	-	-	-	-
Alternative 3' splice site	ENSG00000131788	PIAS3	1:145580322:145580502:+	0.17	-	-	-	-	-	-	-
Alternative 3' splice site	ENSG00000143437	ARNT	1:150786715:150788735:-	-0.16	-	-0.18	-	-	-	-	-
Alternative 3' splice site	ENSG00000143398	PIP5K1A	1:151171557:151196721:+	-	-	-0.14	-	-	-	-	-
Alternative 3' splice site	ENSG00000189334	S100A14	1:153588415:153588709:-	-0.27	-0.3	-	-	-	-	-	-
Alternative 3' splice site	ENSG00000160679	CHTOP	1:153610924:153614719:+	-	-	-	0.15	-	0.14	0.11	-
Alternative 3' splice site	ENSG00000160691	SHC1	1:154938556:154938638:-	-	-	0.16	-	-	-	-	-
Alternative 3' splice site	ENSG00000176444	CLK2	1:155239507:155240599:-	-	0.23	-	-	-	-	-	-
Alternative 3' splice site	ENSG00000117143	UAP1	1:162560301:162562522:+	-	-	-	-	-	-0.13	-	-
Alternative 3' splice site	ENSG00000055070	SZRD1	1:16693803:16719723:+	-0.14	-0.23	-	-	-	-	-	-
Alternative 3' splice site	ENSG00000159363	ATP13A2	1:17330906:17331187:-	-	-	-	-	-	-	0.19	-
Alternative 3' splice site	ENSG00000159363	ATP13A2	1:17330906:17331202:-	-	0.13	-	-	-	-	-	-
Alternative 3' splice site	ENSG00000143337	TOR1AIP1	1:179858504:179869261:+	-	-	-	-	-	-	-0.19	-
Alternative 3' splice site	ENSG00000227232	WASH7P	1:18369:18913:-	-	-	-	-	-	-0.23	-	-
Alternative 3' splice site	ENSG00000116750	UCHL5	1:192992169:192992974:-	0.21	-	-	-	-	0.15	-	0.14
Alternative 3' splice site	ENSG00000127481	UBR4	1:19472427:19473320:-	0.15	-	-	-	-	-	-	-
Alternative 3' splice site	ENSG00000127463	EMC1	1:19565351:19565725:-	-	-	-	-	-	-0.21	-	-
Alternative 3' splice site	ENSG00000143842	SOX13	1:204086318:204086721:+	-	-	-	-	0.26	-	-	-
Alternative 3' splice site	ENSG00000090686	USP48	1:22056325:22062939:-	-	-	-	0.11	-	-	-	-
Alternative 3' splice site	ENSG00000162910	MRPL55	1:228296022:228296138:-	-	-	-	-	-	0.18	-	-
Alternative 3' splice site	ENSG00000116906	GNPAT	1:231377202:231386707:+	-	-	-	-0.2	-	-	-	-
Alternative 3' splice site	ENSG00000054267	ARID4B	1:235299085:235299349:-	-	-	-0.13	-	-	-	-	-
Alternative 3' splice site	ENSG00000143669	LYST	1:235992339:235993526:-	-	-	-	-	-	0.18	-	-
Alternative 3' splice site	ENSG00000142676	RPL11	1:24018319:24019099:+	-	-0.15	-	-	-	-	-	-
Alternative 3' splice site	ENSG00000188529	SRSF10	1:24298116:24298340:-	-	-0.14	-	-	-	-	-	-
Alternative 3' splice site	ENSG00000133226	SRRM1	1:24987290:24987801:+	-	-	-	-	0.26	0.28	0.17	-
Alternative 3' splice site	ENSG00000134644	PUM1	1:31453013:31454159:-	-0.2	-	-	-	-	-	-	-
Alternative 3' splice site	ENSG00000121775	TMEM39B	1:32542919:32557273:+	-	-	-	-	0.54	-	-	0.25
Alternative 3' splice site	ENSG00000116497	S100PBP	1:33292531:33293594:+	-	-	-0.3	-	-	-	-	-
Alternative 3' splice site	ENSG00000116514	RNF19B	1:33413967:33415170:-	-	-	-	-	-0.13	-	-0.19	-
Alternative 3' splice site	ENSG00000116560	SFPQ	1:35642075:35642920:-	-	-	-0.14	-0.16	-	-	-	-
Alternative 3' splice site	ENSG00000116871	MAP7D1	1:36644916:36645113:+	-	-	0.18	-	-	-	-	-
Alternative 3' splice site	ENSG00000066136	NFYC	1:41235087:41236381:+	-	-	0.11	-	-	-	-	-
Alternative 3' splice site	ENSG00000041988	THAP3	1:6688751:6690348:+	-0.19	-	-	-	-	-	-	-
Alternative 3' splice site	ENSG00000116754	SRSF11	1:70716186:70716291:+	-	-0.14	-	-	-	-	-	-
Alternative 3' splice site	ENSG00000235823	LINC00263	10:102141205:102147791:+	-	-	-	-	-	-	-	0.18
Alternative 3' splice site	ENSG00000198408	MGEA5	10:103550848:103551111:-	0.12	-	-	-	-	-	-	-
Alternative 3' splice site	ENSG00000077150	NFKB2	10:104161916:104162009:+	-	-	0.2	-	-	-	-	-
Alternative 3' splice site	ENSG00000136754	ABI1	10:27048167:27054147:-	-	-	-	-	-	-	-	-0.18
Alternative 3' splice site	ENSG00000189180	ZNF33A	10:38306314:38343303:+	-	-	-	-	0.2	-	-	-
Alternative 3' splice site	ENSG00000107758	PPP3CB	10:75206334:75214170:-	-	-	-	-	-	-	0.2	-
Alternative 3' splice site	ENSG00000155229	MMS19	10:99225916:99226261:-	-	0.17	-	0.13	-	-	-	-
Alternative 3' splice site	ENSG00000076053	RBM7	11:114273637:114276428:+	-	-	-	-	-	-	-0.19	-0.17
Alternative 3' splice site	ENSG00000172375	C2CD2L	11:118984422:118984562:+	-	-	-	-	-	0.2	-	0.18
Alternative 3' splice site	ENSG00000166181	API5	11:43357544:43363980:+	-	-	-	-	-0.17	-0.16	-	-
Alternative 3' splice site	ENSG00000149187	CELF1	11:47498511:47498849:-	-0.16	-	-	-	-	-	-	0.14
Alternative 3' splice site	ENSG00000149187	CELF1	11:47506075:47508302:-	-	-0.12	-	-	-	-	-	-
Alternative 3' splice site	ENSG00000149115	TNKS1BP1	11:57069701:57069933:-	-	-	0.18	-	-	-	-	-
Alternative 3' splice site	ENSG00000070047	PHRF1	11:605300:605605:+	-	-	-	-	-	0.2	-	-
Alternative 3' splice site	ENSG00000006118	TMEM132A	11:60698131:60699158:+	-	-	-0.17	-	-	-	-	-
Alternative 3' splice site	ENSG00000167994	RAB3IL1	11:61665832:61666786:-	-	-	-	-	-	-0.15	-	-
Alternative 3' splice site	ENSG00000149499	EML3	11:62376949:62377101:-	-	-	-	-0.2	-	-	-	-
Alternative 3' splice site	ENSG00000168003	SLC3A2	11:62639141:62644256:+	-	-	-	-0.22	-	-	-	-
Alternative 3' splice site	ENSG00000173153	ESRRA	11:64081839:64082213:+	-	-	-	-0.19	-	-	-	-
Alternative 3' splice site	ENSG00000162298	SYVN1	11:64897647:64897723:-	-	0.22	-	-	-	-	-	-
Alternative 3' splice site	ENSG00000173715	C11orf80	11:66595835:66605838:+	-	-0.17	-	-0.21	-	-0.33	-	-
Alternative 3' splice site	ENSG00000131626	PPFIA1	11:70208594:70218318:+	-	0.12	-	-	-	-	-	-
Alternative 3' splice site	ENSG00000137501	SYTL2	11:85428576:85429833:-	-	-	-	0.16	-	-	-	-
Alternative 3' splice site	ENSG00000183020	AP2A2	11:984753:985432:+	-	-	-	-	-	-	0.21	-
Alternative 3' splice site	ENSG00000120860	CCDC53	12:102433756:102437883:-	0.16	0.13	-	-	-	-	-	-
Alternative 3' splice site	ENSG00000173064	HECTD4	12:112614506:112616735:-	0.24	-	-	-	-	-	-	-
Alternative 3' splice site	ENSG00000123064	DDX54	12:113596917:113599075:-	-	-	-	0.14	-	-	-	-
Alternative 3' splice site	ENSG00000123066	MED13L	12:116435035:116440808:-	-	-	-	-	0.12	-	-	0.14
Alternative 3' splice site	ENSG00000157895	C12orf43	12:121442295:121442806:-	-	0.17	-	-	0.28	-	0.39	0.28
Alternative 3' splice site	ENSG00000175727	MLXIP	12:122622137:122622738:+	-	-	-	-	-	0.13	0.28	-
Alternative 3' splice site	ENSG00000111011	RSRC2	12:122992997:122995656:-	-	-	-	-	-0.17	-	-	-
Alternative 3' splice site	ENSG00000196498	NCOR2	12:124841352:124846672:-	-	-	-0.18	-	-	-	-	-
Alternative 3' splice site	ENSG00000196498	NCOR2	12:124846843:124848225:-	-	-	-	-	-0.15	-	-	-
Alternative 3' splice site	ENSG00000196498	NCOR2	12:124887107:124904503:-	-0.16	-	-0.16	-	-0.26	-0.28	-0.21	-
Alternative 3' splice site	ENSG00000183495	EP400	12:132446499:132464239:+	0.22	-	-	-	-0.36	-	-	-
Alternative 3' splice site	ENSG00000112787	FBRSL1	12:133146827:133146921:+	-0.2	-0.29	-	-	-	-	-	-
Alternative 3' splice site	ENSG00000111206	FOXM1	12:2973921:2975559:-	-0.2	-	-	-	-0.12	-	-	-
Alternative 3' splice site	ENSG00000167548	MLL2	12:49435318:49435438:-	-	-	-0.19	-	-	-	-	-
Alternative 3' splice site	ENSG00000139613	SMARCC2	12:56566488:56567480:-	-	-	-	-0.11	-	-	-	-
Alternative 3' splice site	ENSG00000111602	TIMELESS	12:56826308:56826810:-	-	-	-	-	0.11	-	-	-
Alternative 3' splice site	ENSG00000166987	MBD6	12:57921800:57921927:+	-0.15	-	-	-0.23	-	-	-	-
Alternative 3' splice site	ENSG00000111653	ING4	12:6761936:6762102:-	-	-	-	-	-0.15	-	-	-
Alternative 3' splice site	ENSG00000111605	CPSF6	12:69653977:69656150:+	-	-	-	-0.19	-	-	-	-
Alternative 3' splice site	ENSG00000215021	PHB2	12:7076404:7077055:-	-	-	-	-	-	-	-	0.17
Alternative 3' splice site	ENSG00000173598	NUDT4	12:93789309:93792544:+	-	-	-	-	0.25	-	-	-
Alternative 3' splice site	ENSG00000111142	METAP2	12:95868106:95869847:+	-	-	-	-	-	-	-	0.17
Alternative 3' splice site	ENSG00000060237	WNK1	12:971436:987378:+	-	-	-	-	-	-	-	-0.13
Alternative 3' splice site	ENSG00000132964	CDK8	13:26975484:26975603:+	-	-	-	-0.27	-	-	-	-
Alternative 3' splice site	ENSG00000185024	BRF1	14:105686467:105687985:-	0.15	-	-	-	-	-	-	-
Alternative 3' splice site	ENSG00000151332	MBIP	14:36768396:36769991:-	-	-	0.16	-	-	-	-	-
Alternative 3' splice site	ENSG00000100644	HIF1A	14:62162557:62187097:+	-	-	-	-	-	-	-	-0.14
Alternative 3' splice site	ENSG00000257365	FNTB	14:65390844:65392725:+	-	0.12	-	0.14	-	-	-	-
Alternative 3' splice site	ENSG00000198732	SMOC1	14:70490164:70496959:+	-	-	-	-	-0.11	-	-	-
Alternative 3' splice site	ENSG00000119685	TTLL5	14:76249873:76259256:+	-	-0.27	-	-	-	-	-	-
Alternative 3' splice site	ENSG00000100722	ZC3H14	14:89075747:89076056:+	-	-	-	-	-	-	-0.24	-
Alternative 3' splice site	ENSG00000090060	PAPOLA	14:97018959:97022184:+	-	-	0.11	-	-	-	-	-
Alternative 3' splice site	ENSG00000140181	HERC2P2	15:23316186:23316892:-	-	-	-0.22	-	-	-	-	-
Alternative 3' splice site	ENSG00000128731	HERC2	15:28421917:28422096:-	-	-0.13	-	-	-	-	-	-
Alternative 3' splice site	ENSG00000175265	GOLGA8A	15:34674730:34674998:-	-	-	-	-	0.22	-	-	-
Alternative 3' splice site	ENSG00000051180	RAD51	15:40991043:40993262:+	-	-	-	-	-	-	-0.17	-
Alternative 3' splice site	ENSG00000137804	NUSAP1	15:41650456:41657600:+	-	0.18	-	-	-	-	-	-
Alternative 3' splice site	ENSG00000092439	TRPM7	15:50875356:50878589:-	-	-0.28	-	-0.28	-	-	-	-
Alternative 3' splice site	ENSG00000137817	PARP6	15:72543298:72543548:-	-0.14	-	-	-	-	-	-	0.17
Alternative 3' splice site	ENSG00000159322	ADPGK	15:73045236:73047897:-	-	-	0.26	0.18	-	-	-	-
Alternative 3' splice site	ENSG00000140465	CYP1A1	15:75015467:75017506:-	-	-	-	-	-	-0.12	-	-
Alternative 3' splice site	ENSG00000140474	ULK3	15:75134761:75135345:-	-	-0.22	-	-	-	-	-	-
Alternative 3' splice site	ENSG00000140443	IGF1R	15:99467913:99472787:+	-	-	-	-	-0.17	-	-	-
Alternative 3' splice site	ENSG00000103197	TSC2	16:2126586:2129033:+	-	-	-	-0.32	-	-	-	-
Alternative 3' splice site	ENSG00000103197	TSC2	16:2127727:2129033:+	-	-	-	-	0.26	-	-	-
Alternative 3' splice site	ENSG00000197006	METTL9	16:21636436:21666548:+	-	-	-	0.12	-	-	-	-
Alternative 3' splice site	ENSG00000168488	ATXN2L	16:28846720:28846867:+	-	-	-	-	0.11	-	-	-
Alternative 3' splice site	ENSG00000168488	ATXN2L	16:28847443:28848069:+	-	-0.18	-	-	-	-	-	-
Alternative 3' splice site	ENSG00000169957	ZNF768	16:30544472:30545518:-	-	-	-	-	-	0.45	-	-
Alternative 3' splice site	ENSG00000169951	ZNF764	16:30567431:30569054:-	-0.21	-	-	-	-	-	-	-
Alternative 3' splice site	ENSG00000126603	GLIS2	16:4385194:4385273:+	-	-	-	-	-	-	0.16	-
Alternative 3' splice site	ENSG00000166164	BRD7	16:50354688:50355893:-	-0.24	-	-0.19	-	0.17	0.17	-	-
Alternative 3' splice site	ENSG00000102900	NUP93	16:56870629:56871517:+	-	-	-0.19	-	-	-	-	-
Alternative 3' splice site	ENSG00000090565	RAB11FIP3	16:569024:569754:+	-	-	-	-0.13	-	-	-	-
Alternative 3' splice site	ENSG00000140853	NLRC5	16:57089006:57089345:+	-	-	-	-	-	-	-	0.25
Alternative 3' splice site	ENSG00000125107	CNOT1	16:58590897:58592377:-	-	-	-	-	-0.12	-	-	-
Alternative 3' splice site	ENSG00000132604	TERF2	16:69391464:69395307:-	-	-	0.18	-	-	-	-	-
Alternative 3' splice site	ENSG00000140983	RHOT2	16:720773:720889:+	0.14	0.13	0.22	0.2	-	-0.13	-	-0.21
Alternative 3' splice site	ENSG00000140836	ZFHX3	16:72863758:72923630:-	0.14	-	-	0.19	-	-	-	-
Alternative 3' splice site	ENSG00000104731	KLHDC4	16:87741681:87741956:-	-0.18	-	-	-	-	-	-	-
Alternative 3' splice site	ENSG00000133028	SCO1	17:10599151:10600552:-	-	-	-	-	-	0.18	-	-
Alternative 3' splice site	ENSG00000141027	NCOR1	17:15952302:15960828:-	-	-0.15	-	-	-	-	-	-
Alternative 3' splice site	ENSG00000167549	CORO6	17:27942875:27942963:-	-	-	-	-	0.2	-	-	-
Alternative 3' splice site	ENSG00000167258	CDK12	17:37619370:37627132:+	-	-	-	-0.25	-	-	-	-
Alternative 3' splice site	ENSG00000173801	JUP	17:39928114:39942155:-	-	-	-0.17	-	-	-	-	-
Alternative 3' splice site	ENSG00000185722	ANKFY1	17:4085647:4086693:-	-	-	-0.19	-	-	-	-	-
Alternative 3' splice site	ENSG00000008294	SPAG9	17:49072588:49072805:-	-	-	-	-	0.16	-	-	-
Alternative 3' splice site	ENSG00000170921	TANC2	17:61495768:61497357:+	-	-	-	0.15	-	-	-	-
Alternative 3' splice site	ENSG00000198265	HELZ	17:65156481:65157013:-	-	-	-0.18	-	-	-	-	-
Alternative 3' splice site	ENSG00000109066	TMEM104	17:72791250:72791663:+	-	-	-	-	-	-	-	-0.12
Alternative 3' splice site	ENSG00000177728	KIAA0195	17:73489997:73490708:+	-	-	-	-	-	-0.16	-	-
Alternative 3' splice site	ENSG00000073350	LLGL2	17:73570749:73570952:+	-	-	-	-	-0.16	-	-	-
Alternative 3' splice site	ENSG00000132471	WBP2	17:73843693:73844651:-	-	-	-	-	-0.18	-	-	-
Alternative 3' splice site	ENSG00000233223	AC113189.5	17:7485481:7487236:-	-	-	-	-	-	-	0.24	-
Alternative 3' splice site	ENSG00000184640	2018-09-09	17:75315885:75398416:+	-	-	-	-	-	-0.18	-	-
Alternative 3' splice site	ENSG00000141510	TP53	17:7577158:7577499:-	-	-	-	-	-	-	-0.14	-
Alternative 3' splice site	ENSG00000055483	USP36	17:76798620:76799467:-	0.16	-	-	-	-	-	-	-
Alternative 3' splice site	ENSG00000167291	TBC1D16	17:77924377:77925249:-	0.18	-	-	-	-	-	-	-
Alternative 3' splice site	ENSG00000175866	BAIAP2	17:79077908:79078311:+	-	-	-	-	0.14	-	-	-
Alternative 3' splice site	ENSG00000134440	NARS	18:55287883:55288940:-	-	-	-	-	-	-	0.18	-
Alternative 3' splice site	ENSG00000127616	SMARCA4	19:11152236:11168931:+	-	-	-	-	-	0.13	-	0.14
Alternative 3' splice site	ENSG00000179262	RAD23A	19:13059973:13060089:+	-	-	0.11	0.19	-	-	-	-
Alternative 3' splice site	ENSG00000071626	DAZAP1	19:1433826:1434736:+	-	-	-	-	-	-	-	0.12
Alternative 3' splice site	ENSG00000071564	TCF3	19:1650289:1652299:-	-	0.16	-	-	-	-	-	-
Alternative 3' splice site	ENSG00000064490	RFXANK	19:19304942:19307772:+	-	-	-	-	-	-	0.22	-
Alternative 3' splice site	ENSG00000125912	NCLN	19:3206188:3206260:+	-	-0.17	-	-	-	-	-	-
Alternative 3' splice site	ENSG00000105290	APLP1	19:36368727:36368984:+	-	-	-	-	-	-0.27	-	-
Alternative 3' splice site	ENSG00000105738	SIPA1L3	19:38682950:38684177:+	-	-	0.13	-	-	-	-	-
Alternative 3' splice site	ENSG00000105245	NUMBL	19:41179554:41183137:-	-	-	-	-	0.16	-	-	-
Alternative 3' splice site	ENSG00000079432	CIC	19:42797011:42797108:+	-	-	-	-	-0.17	-	-	-
Alternative 3' splice site	ENSG00000167674	HDGFRP2	19:4501329:4501923:+	-	-	-	-	0.18	0.14	-	0.14
Alternative 3' splice site	ENSG00000130204	TOMM40	19:45394571:45394664:+	0.11	-	-	-	-	-	-	-
Alternative 3' splice site	ENSG00000105486	LIG1	19:48654596:48657129:-	-	-	-	0.15	-	0.18	0.2	-
Alternative 3' splice site	ENSG00000161677	JOSD2	19:51013705:51014374:-	-	-	-0.24	-	-	-	-	-
Alternative 3' splice site	ENSG00000125503	PPP1R12C	19:55604236:55604384:-	-	-	-	-0.21	-	-	-0.18	-
Alternative 3' splice site	ENSG00000125503	PPP1R12C	19:55606971:55607235:-	-	-	-	-	-	-	-	-0.21
Alternative 3' splice site	ENSG00000160633	SAFB	19:5657358:5661529:+	-	-	-	-	-	-	-	-0.12
Alternative 3' splice site	ENSG00000099822	HCN2	19:610405:613248:+	-	-	-	-	-	-	-0.13	-
Alternative 3' splice site	ENSG00000032444	PNPLA6	19:7616323:7618758:+	-0.21	-	-	-	0.14	-	-	-
Alternative 3' splice site	ENSG00000104980	TIMM44	19:7999126:7999950:-	0.11	-	-	0.25	-	-	-	-
Alternative 3' splice site	ENSG00000048991	R3HDM1	2:136403097:136409300:+	-	-	0.17	-	-	-	-	-
Alternative 3' splice site	ENSG00000082438	COBLL1	2:165552346:165555915:-	0.24	-	-	0.18	-	-	-	-
Alternative 3' splice site	ENSG00000077380	DYNC1I2	2:172602437:172604286:+	-	-	-	-0.21	-	-	-	-
Alternative 3' splice site	ENSG00000138386	NAB1	2:191548553:191550202:+	-	-	-	-	0.16	-	-	-
Alternative 3' splice site	ENSG00000144524	COPS7B	2:232656518:232658970:+	-	-	-	-	-	0.15	0.15	-
Alternative 3' splice site	ENSG00000138031	ADCY3	2:25048998:25050415:-	-	-	-	-	-	-	-0.12	-0.14
Alternative 3' splice site	ENSG00000157992	KRTCAP3	2:27666928:27667053:+	-	-0.2	-	-	-	-	-	-
Alternative 3' splice site	ENSG00000243943	ZNF512	2:27806583:27820934:+	-	-	-	-	-	0.22	-	-
Alternative 3' splice site	ENSG00000057935	MTA3	2:42924974:42931334:+	-	-	-	-	-	-	0.17	-
Alternative 3' splice site	ENSG00000119844	AFTPH	2:64812679:64819019:+	-	-	-	0.23	-	-	-	-
Alternative 3' splice site	ENSG00000197586	ENTPD6	20:25187226:25187712:+	-	-	-0.15	-	-	-	-	-
Alternative 3' splice site	ENSG00000149600	COMMD7	20:31315949:31331114:-	-0.23	-	-	-	-	-	-	-
Alternative 3' splice site	ENSG00000198646	NCOA6	20:33315211:33320363:-	-	-	-	-0.14	-	-	-	-
Alternative 3' splice site	ENSG00000088367	EPB41L1	20:34778719:34782134:+	-	-	-	-	-0.16	-	-	-
Alternative 3' splice site	ENSG00000088367	EPB41L1	20:34802362:34806798:+	-	-	-	-0.19	-	-	-	-
Alternative 3' splice site	ENSG00000124181	PLCG1	20:39802651:39802764:+	-	-	-	0.12	-	-	-	-
Alternative 3' splice site	ENSG00000130702	LAMA5	20:60902725:60902922:-	-	-	-	-0.15	-	-	-	-
Alternative 3' splice site	ENSG00000198276	UCKL1	20:62577996:62587613:-	-0.16	-	-	-	-	-	-	-
Alternative 3' splice site	ENSG00000160256	FAM207A	21:46387096:46393112:+	-	-	-	0.11	-	-	-	-
Alternative 3' splice site	ENSG00000182871	COL18A1	21:46925345:46925749:+	-	0.13	-	0.15	-	-	-	-
Alternative 3' splice site	ENSG00000160299	PCNT	21:47818044:47818149:+	-	-	-0.23	-	-	-	-	-
Alternative 3' splice site	ENSG00000160305	DIP2A	21:47918746:47924271:+	-	-	-	-	-	-0.19	-	-
Alternative 3' splice site	ENSG00000160310	PRMT2	21:48056459:48056805:+	0.16	-	-	-	-	-	-	-
Alternative 3' splice site	ENSG00000182944	EWSR1	22:29684775:29687551:+	-	-	-	-	-	-	-0.24	-
Alternative 3' splice site	ENSG00000100320	RBFOX2	22:36177793:36205827:-	-	-	-	-	-	-	-	-0.15
Alternative 3' splice site	ENSG00000182841	RRP7B	22:42973968:42976223:-	-	-	-	-	-	-0.13	-	-
Alternative 3' splice site	ENSG00000100239	PPP6R2	22:50877191:50878127:+	-	-	-	-	-	-	0.22	-
Alternative 3' splice site	ENSG00000157020	SEC13	3:10342831:10345710:-	-	-	-0.15	-	-	-	-	-
Alternative 3' splice site	ENSG00000072858	SIDT1	3:113331041:113334944:+	-	-0.16	-	-	-	-	-	-
Alternative 3' splice site	ENSG00000159685	CHCHD6	3:126452065:126571487:+	-	-	-	0.2	-	-	-	-
Alternative 3' splice site	ENSG00000172667	ZMAT3	3:178743016:178745211:-	-	0.2	-	-	-	-	-	-
Alternative 3' splice site	ENSG00000163872	YEATS2	3:183470041:183471911:+	-	-	-	-	-0.2	-	-	-
Alternative 3' splice site	ENSG00000156976	EIF4A2	3:186501428:186502218:+	-	-	-	0.13	-	-	-	0.13
Alternative 3' splice site	ENSG00000198836	OPA1	3:193360838:193361159:+	0.13	-	-	-	-	-	-	-
Alternative 3' splice site	ENSG00000164045	CDC25A	3:48224520:48225290:-	-	-	-	-	-	-	0.16	-
Alternative 3' splice site	ENSG00000164078	MST1R	3:49933840:49933973:-	-	-	-	-	-	-0.16	-	-
Alternative 3' splice site	ENSG00000012171	SEMA3B	3:50311259:50311344:+	-	-	-	-	-	0.17	0.18	-
Alternative 3' splice site	ENSG00000163686	ABHD6	3:58271180:58279313:+	-	-	-	-	-	-	-	0.2
Alternative 3' splice site	ENSG00000156983	BRPF1	3:9784937:9785262:+	-	-0.25	-	-	-	-	-	-
Alternative 3' splice site	ENSG00000109320	NFKB1	4:103451071:103455002:+	0.2	-	-	-	-	-	-	0.19
Alternative 3' splice site	ENSG00000150961	SEC24D	4:119736313:119736606:-	-	0.18	0.22	-	-	-	-	-
Alternative 3' splice site	ENSG00000181381	DDX60L	4:169317278:169321977:-	-	-0.19	-	-	-	-	-	-
Alternative 3' splice site	ENSG00000035928	RFC1	4:39308324:39310256:-	-0.25	-0.24	-	-	-	-	-	-
Alternative 3' splice site	ENSG00000163697	APBB2	4:40947090:41015600:-	0.22	0.24	0.29	-	-	-	-	-
Alternative 3' splice site	ENSG00000145730	PAM	5:102355547:102360835:+	-	-	-	-	-0.13	-	-0.13	-
Alternative 3' splice site	ENSG00000145730	PAM	5:102361038:102363886:+	-	-	-	-	-	-	0.18	-
Alternative 3' splice site	ENSG00000043143	PHF15	5:133909452:133914184:+	-	-	-	-	0.25	-	-	-
Alternative 3' splice site	ENSG00000043143	PHF15	5:133912586:133914184:+	0.19	-	0.29	-	-	0.17	-	-
Alternative 3' splice site	ENSG00000091009	RBM27	5:145609473:145610217:+	-0.19	-0.13	-	-0.17	-	-	-	-
Alternative 3' splice site	ENSG00000070814	TCOF1	5:149771739:149772268:+	-	-	-	-0.26	-	-	-	-
Alternative 3' splice site	ENSG00000113645	WWC1	5:167891967:167894845:+	-	0.17	-	-	-	-	-	-
Alternative 3' splice site	ENSG00000048162	NOP16	5:175811287:175812222:-	-	-0.11	-	-	-	-	-	-
Alternative 3' splice site	ENSG00000155545	MIER3	5:56224688:56226491:-	-0.34	-0.22	-0.31	-	-	-	-	-
Alternative 3' splice site	ENSG00000153914	SREK1	5:65470869:65473342:+	-	-	-	-	-	-	-0.21	-
Alternative 3' splice site	ENSG00000028310	BRD9	5:886822:887476:-	-	-0.14	-	-	-	-	-	-
Alternative 3' splice site	ENSG00000153113	CAST	5:96098076:96100925:+	-	-	-0.12	-	-	-	-	-
Alternative 3' splice site	ENSG00000112592	TBP	6:170863551:170865967:+	-	-	-	-	0.19	-	-	-
Alternative 3' splice site	ENSG00000197409	HIST1H3D	6:26197497:26199087:-	-	-	-	-	-0.16	-	-	-
Alternative 3' splice site	ENSG00000137337	MDC1	6:30679281:30679444:-	-	-	-	-	-	-0.21	-	-
Alternative 3' splice site	ENSG00000204209	DAXX	6:33289754:33290639:-	-	-	-	-	-	0.16	-	-
Alternative 3' splice site	ENSG00000137166	FOXP4	6:41554894:41555037:+	-	-	-	-	-	-	-	0.18
Alternative 3' splice site	ENSG00000048544	MRPS10	6:42181930:42182018:-	-	-	-	-0.16	-	-	-	-
Alternative 3' splice site	ENSG00000119900	OGFRL1	6:72003082:72003233:+	-	-	-	-	0.2	-	-	-
Alternative 3' splice site	ENSG00000135316	SYNCRIP	6:86322641:86324699:-	0.12	0.13	-	-	-	-	-	-
Alternative 3' splice site	ENSG00000122644	ARL4A	7:12726668:12727791:+	-	-	-	-	0.15	-	0.22	-
Alternative 3' splice site	ENSG00000159840	ZYX	7:143078502:143078650:+	-	-	-	0.22	-	-	-	-
Alternative 3' splice site	ENSG00000170265	ZNF282	7:148907796:148909447:+	-	-	0.21	-	-	-	-	-
Alternative 3' splice site	ENSG00000214022	REPIN1	7:150066957:150068317:+	-0.27	-	-0.31	-	-	-	-	-
Alternative 3' splice site	ENSG00000146909	NOM1	7:156743418:156745165:+	-	-	-	0.19	-	-	-	-
Alternative 3' splice site	ENSG00000164649	CDCA7L	7:21951372:21956372:-	-	-	-	-	-	-	-	-0.26
Alternative 3' splice site	ENSG00000154710	RABGEF1	7:66240380:66248659:+	-	-	-0.18	-	-	-	-	-
Alternative 3' splice site	ENSG00000127952	STYXL1	7:75659845:75677130:-	-	-	-	-	-	-0.21	-	-
Alternative 3' splice site	ENSG00000003147	ICA1	7:8272385:8275540:-	-	-0.19	-	-	-	-	-	-
Alternative 3' splice site	ENSG00000164828	SUN1	7:892304:892447:+	-	-	-	-	-	-	0.22	-
Alternative 3' splice site	ENSG00000243554	AC004967.7	7:97596289:97598317:-	-	-	-0.15	-	-	-	-	-
Alternative 3' splice site	ENSG00000158106	RHPN1	8:144462155:144462232:+	-	-	-0.4	-	-	-	-	-
Alternative 3' splice site	ENSG00000104613	INTS10	8:19684070:19687914:+	-	-	-	0.17	-	-	-	-
Alternative 3' splice site	ENSG00000168453	HR	8:21979207:21980006:-	-	-	-	-	-	-	-0.11	-
Alternative 3' splice site	ENSG00000253729	PRKDC	8:48751810:48752577:-	-0.14	-	-0.12	-	-	-	-	-
Alternative 3' splice site	ENSG00000205133	TRIQK	8:93929238:93966634:-	-	-	0.21	-	-	-	-	-
Alternative 3' splice site	ENSG00000242616	GNG10	9:114429226:114431549:+	-	-0.17	-	-	-	-	-	-
Alternative 3' splice site	ENSG00000157693	C9orf91	9:117386739:117389176:+	0.11	0.13	-	0.21	-	-	-	-
Alternative 3' splice site	ENSG00000106976	DNM1	9:131004624:131008673:+	0.18	0.19	-	-	-	-	-	-
Alternative 3' splice site	ENSG00000167130	DOLPP1	9:131847047:131847299:+	-	-	-	-	-	-	0.11	-
Alternative 3' splice site	ENSG00000126883	NUP214	9:134021691:134022874:+	-	-	-	-0.17	-	-	-	-
Alternative 3' splice site	ENSG00000196642	RABL6	9:139726822:139728172:+	-	-	-	-	-	0.12	-	-
Alternative 3' splice site	ENSG00000086102	NFX1	9:33332500:33338505:+	-	-	0.24	-	-	-	-	-
Alternative 3' splice site	ENSG00000107372	ZFAND5	9:74975703:74979612:-	0.14	0.13	-	-	-	-	-	-
Alternative 3' splice site	ENSG00000147394	ZNF185	X:152088955:152089251:+	-0.23	-	-	-	-	-	-	-
Alternative 3' splice site	ENSG00000214717	ZBED1	X:2408813:2418352:-	-	-	-	-	-	-	-	0.29
Alternative 3' splice site	ENSG00000214717	ZBED1	X:2408813:2418858:-	-	-	-	-	-	-	-	0.11
Alternative 3' splice site	ENSG00000102103	PQBP1	X:48759319:48760009:+	-	-	-	-	-	-0.11	-	-
Alternative 3' splice site	ENSG00000196998	WDR45	X:48934412:48935302:-	-	-	-	-	0.13	-	-	-
Alternative 3' splice site	ENSG00000126012	KDM5C	X:53246459:53246978:-	0.12	-	0.14	-	-	-	-	-
Alternative 3' splice site	ENSG00000186787	SPIN2B	X:57147067:57147671:-	-	-	-	-	0.13	-	-	0.13
Alternative 5' splice site	ENSG00000131591	C1orf159	1:1018367:1019295:-	-	-	-	-	-	0.28	0.11	-
Alternative 5' splice site	ENSG00000160049	DFFA	1:10521759:10523045:-	-	-	0.21	0.26	-	0.23	0.27	0.17
Alternative 5' splice site	ENSG00000134186	PRPF38B	1:109238402:109238665:+	-	-	-	-	0.29	-	-	-
Alternative 5' splice site	ENSG00000215717	TMEM167B	1:109635704:109637039:+	-	-	-	0.13	-	-	0.17	-
Alternative 5' splice site	ENSG00000134222	PSRC1	1:109823111:109823392:-	-	-	-	-	0.29	-	0.15	-
Alternative 5' splice site	ENSG00000162650	ATXN7L2	1:110034726:110035208:+	-	-	-	-	-	-	0.24	0.13
Alternative 5' splice site	ENSG00000171824	EXOSC10	1:11137005:11137387:-	0.11	-	-	-	-	-	-	-
Alternative 5' splice site	ENSG00000116455	WDR77	1:111990198:111991237:-	-	-	-	-0.11	-	-	-	-
Alternative 5' splice site	ENSG00000052723	SIKE1	1:115321905:115323008:-	0.27	-	-	0.15	-	-0.18	-	-0.11
Alternative 5' splice site	ENSG00000052723	SIKE1	1:115322836:115323008:-	0.49	-	0.31	-	0.52	-	-	-
Alternative 5' splice site	ENSG00000116670	MAD2L2	1:11736197:11736866:-	-	-	-	-	0.14	-	-	-
Alternative 5' splice site	ENSG00000116830	TTF2	1:117603183:117605009:+	0.22	0.14	-	-	-	-	-	-
Alternative 5' splice site	ENSG00000177674	AGTRAP	1:11808667:11810134:+	-	-	-	-	-	-	-0.18	-
Alternative 5' splice site	ENSG00000160087	UBE2J2	1:1198766:1203113:-	-	-	-	-	0.18	-	-	-
Alternative 5' splice site	ENSG00000160087	UBE2J2	1:1203372:1208879:-	-	0.11	0.14	0.12	-	-	-	-
Alternative 5' splice site	ENSG00000127054	CPSF3L	1:1249301:1249677:-	0.17	-	-	-	-	-	-	-
Alternative 5' splice site	ENSG00000224870	RP4-758J18.2	1:1335683:1335985:+	-	-	-	-	-0.25	-	-	-
Alternative 5' splice site	ENSG00000235398	LINC00623	1:144300755:144301071:-	-0.24	-	-	-	-	-	-	-
Alternative 5' splice site	ENSG00000235398	LINC00623	1:144300755:144301190:-	-0.14	-	-	-0.26	-	-	-	-
Alternative 5' splice site	ENSG00000236943	RP11-640M9.1	1:144480984:144481300:-	-	-	-	-	-0.11	0.18	0.27	-
Alternative 5' splice site	ENSG00000168614	NBPF9	1:144822084:144823128:+	-0.21	-	-	-	-	-	-	-
Alternative 5' splice site	ENSG00000168614	NBPF9	1:144822084:144823128:+	-0.21	-	-	-	-	-	-	-
Alternative 5' splice site	ENSG00000117289	TXNIP	1:145440529:145440632:+	-	-	0.11	0.23	-	-	-	-
Alternative 5' splice site	ENSG00000131788	PIAS3	1:145584048:145584129:+	-	-	-	-	0.32	0.26	0.39	0.39
Alternative 5' splice site	ENSG00000186275	NBPF12	1:146418301:146419344:+	-0.36	-	-	-	-	-	-	-
Alternative 5' splice site	ENSG00000143420	ENSA	1:150598284:150599788:-	-	-	0.21	0.27	-	0.15	0.24	-
Alternative 5' splice site	ENSG00000143420	ENSA	1:150599002:150599788:-	-	-	-	-	-	-	0.38	-
Alternative 5' splice site	ENSG00000163156	SCNM1	1:151138728:151138947:+	0.15	-	-	-	0.11	-	0.22	-
Alternative 5' splice site	ENSG00000143393	PI4KB	1:151265509:151266494:-	-	-	-	-	-0.1	-	-	-
Alternative 5' splice site	ENSG00000182134	TDRKH	1:151755525:151762856:-	0.26	-	-	-	-	-	-	-
Alternative 5' splice site	ENSG00000143621	ILF2	1:153640553:153640925:-	-	-	-	-0.11	-	-	-	-
Alternative 5' splice site	ENSG00000143578	CREB3L4	1:153941175:153941406:+	0.2	-	-	-	-	-	-	-
Alternative 5' splice site	ENSG00000143569	UBAP2L	1:154207268:154207672:+	0.14	0.15	0.14	0.21	0.28	-	0.16	0.15
Alternative 5' splice site	ENSG00000160710	ADAR	1:154562404:154562660:-	-	-	-	-	0.1	-	-	-
Alternative 5' splice site	ENSG00000160688	FLAD1	1:154963004:154965041:+	-	-	-	-	-	-0.14	-	-
Alternative 5' splice site	ENSG00000169242	EFNA1	1:155104120:155105979:+	-	-	0.17	-	-	-	-	-
Alternative 5' splice site	ENSG00000116521	SCAMP3	1:155227448:155228582:-	-	-	-	-	0.14	-	-	-
Alternative 5' splice site	ENSG00000125459	MSTO1	1:155581146:155581340:+	0.16	0.3	0.27	0.39	-	-	-	-
Alternative 5' splice site	ENSG00000125459	MSTO1	1:155581643:155581774:+	0.12	-	0.25	0.3	-	-	-	-
Alternative 5' splice site	ENSG00000125459	MSTO1	1:155581643:155581774:+	0.12	-	0.24	0.3	-	-	-	-
Alternative 5' splice site	ENSG00000163374	YY1AP1	1:155640255:155642063:-	-	-	0.11	0.18	-	-	-	-
Alternative 5' splice site	ENSG00000163374	YY1AP1	1:155649303:155650173:-	-	-	-	-	0.16	-	-	-
Alternative 5' splice site	ENSG00000163374	YY1AP1	1:155649303:155650173:-	-	-	-	-	0.15	-	-	-
Alternative 5' splice site	ENSG00000132676	DAP3	1:155659034:155679564:+	-	0.17	0.23	-	-	-	-	-
Alternative 5' splice site	ENSG00000116584	ARHGEF2	1:155917806:155920060:-	-	-	-	-	0.27	-	0.14	0.12
Alternative 5' splice site	ENSG00000248333	CDK11B	1:1577362:1577708:-	-0.11	-0.13	0.24	-0.15	0.38	-	-	0.21
Alternative 5' splice site	ENSG00000116138	DNAJC16	1:15892905:15893594:+	-	-	0.22	-	-	-	-	-
Alternative 5' splice site	ENSG00000122218	COPA	1:160275563:160276132:-	0.11	-	0.17	0.12	-	-	-	-
Alternative 5' splice site	ENSG00000162736	NCSTN	1:160322785:160322950:+	-	-	-	-	-	-	-	-0.11
Alternative 5' splice site	ENSG00000116786	PLEKHM2	1:16057756:16058384:+	-	-	0.16	0.17	-	-	-	-
Alternative 5' splice site	ENSG00000158773	USF1	1:161012007:161012345:-	-0.15	-0.17	-0.12	-	-0.19	-	-	-
Alternative 5' splice site	ENSG00000158773	USF1	1:161012672:161013043:-	-	-	0.13	-	0.13	-	0.15	0.12
Alternative 5' splice site	ENSG00000158796	DEDD	1:161092313:161092775:-	0.11	-	-	0.24	0.16	-	0.26	-
Alternative 5' splice site	ENSG00000158796	DEDD	1:161093736:161093923:-	-	-	-	-	-	-	0.13	-
Alternative 5' splice site	ENSG00000143222	UFC1	1:161126811:161127044:+	-	-0.12	-0.12	-	-	-	-	-
Alternative 5' splice site	ENSG00000132196	HSD17B7	1:162768725:162769533:+	-	-	0.16	-	-	-	-	-
Alternative 5' splice site	ENSG00000008128	CDK11A	1:1647917:1650767:-	0.15	-	-0.27	-	-	0.2	0.4	-
Alternative 5' splice site	ENSG00000008128	CDK11A	1:1653150:1654027:-	-	-	-	-	0.67	-	-	-
Alternative 5' splice site	ENSG00000143157	POGK	1:166816047:166816731:+	-	-	0.11	0.11	-	-	-	-
Alternative 5' splice site	ENSG00000117523	PRRC2C	1:171483784:171484873:+	0.13	-	-	-	-	-	-	-
Alternative 5' splice site	ENSG00000117523	PRRC2C	1:171553680:171556142:+	0.26	-	-	-	0.13	-	-	-
Alternative 5' splice site	ENSG00000010165	METTL13	1:171751260:171752880:+	-	-	-	-	-0.11	-	-	-
Alternative 5' splice site	ENSG00000159363	ATP13A2	1:17330906:17331187:-	-	-	-	-	-	-	0.19	-
Alternative 5' splice site	ENSG00000116161	CACYBP	1:174977846:174979059:+	-	-	-	0.17	-	-	-	-
Alternative 5' splice site	ENSG00000116260	QSOX1	1:180166025:180166468:+	-	-	-	-	0.17	-	0.17	-
Alternative 5' splice site	ENSG00000116698	SMG7	1:183511637:183513488:+	-	-	0.24	0.22	0.18	-	0.33	0.24
Alternative 5' splice site	ENSG00000116679	IVNS1ABP	1:185270695:185274647:-	-	-	0.15	-	0.24	-	0.15	-
Alternative 5' splice site	ENSG00000127481	UBR4	1:19423774:19426090:-	-	-	-	-0.11	-	0.14	-	-
Alternative 5' splice site	ENSG00000163435	ELF3	1:201979948:201980257:+	-	-	-	0.14	0.28	-	-	-
Alternative 5' splice site	ENSG00000163435	ELF3	1:201982168:201982310:+	-	-	-	-	-	-	0.14	-
Alternative 5' splice site	ENSG00000058673	ZC3H11A	1:203765729:203770703:+	0.17	-	0.16	0.19	0.11	0.21	0.52	-
Alternative 5' splice site	ENSG00000058673	ZC3H11A	1:203765729:203770703:+	0.15	-	0.14	0.15	-	0.2	0.51	-
Alternative 5' splice site	ENSG00000117266	CDK18	1:205492843:205493360:+	-	0.19	-	-	-	-	-	-
Alternative 5' splice site	ENSG00000196352	CD55	1:207510595:207510674:+	-	-	-	-	-	0.32	0.15	0.12
Alternative 5' splice site	ENSG00000117597	DIEXF	1:210006738:210008420:+	-	-	-	-	-	-	-	-0.14
Alternative 5' splice site	ENSG00000117650	NEK2	1:211844626:211846821:-	-	-	-	-	-	-	0.12	-
Alternative 5' splice site	ENSG00000162585	C1orf86	1:2121220:2124086:-	-	-	0.55	-	-	-	-	-
Alternative 5' splice site	ENSG00000162772	ATF3	1:212788770:212791469:+	-	-	0.42	0.42	-	-	0.22	-
Alternative 5' splice site	ENSG00000082482	KCNK2	1:215256774:215259711:+	0.18	-	-	-	-	-	-	-
Alternative 5' splice site	ENSG00000067533	RRP15	1:218478475:218480773:+	-	-	-	-	-	-	-0.17	-
Alternative 5' splice site	ENSG00000186205	2018-03-01	1:220971407:220978394:+	-	-	-	-	0.16	-	0.25	0.13
Alternative 5' splice site	ENSG00000162923	WDR26	1:224612356:224619179:-	-	-	-	-	-	0.15	-	-
Alternative 5' splice site	ENSG00000154358	OBSCN	1:228544045:228547298:+	-	-	-	-	-	-	-	0.2
Alternative 5' splice site	ENSG00000168264	IRF2BP2	1:234743598:234744193:-	-	-	0.18	0.2	-0.17	-	0.15	-
Alternative 5' splice site	ENSG00000153187	HNRNPU	1:245026032:245026919:-	-	-	-	0.12	-	-	-	-
Alternative 5' splice site	ENSG00000153207	AHCTF1	1:247004300:247005996:-	-	-	-0.15	-	-	-	-	-
Alternative 5' splice site	ENSG00000133226	SRRM1	1:24981620:24987210:+	-	-	-	-	0.18	-	-	-
Alternative 5' splice site	ENSG00000117616	C1orf63	1:25570124:25570668:-	-	-	-	-	-0.13	-0.16	-	-
Alternative 5' splice site	ENSG00000198830	HMGN2	1:26800308:26800576:+	-	-	-	-	0.19	-	-	-
Alternative 5' splice site	ENSG00000198830	HMGN2	1:26800308:26800576:+	-	-	-	-	0.19	-	-	-
Alternative 5' splice site	ENSG00000090020	SLC9A1	1:27429049:27429160:-	-	-	0.16	-	-	-	-	-
Alternative 5' splice site	ENSG00000117748	RPA2	1:28233793:28240423:-	-	-	-	-	-	-	-0.11	-0.13
Alternative 5' splice site	ENSG00000180198	RCC1	1:28857127:28858315:+	-	-	-	-	0.17	-	-	-
Alternative 5' splice site	ENSG00000197989	SNHG12	1:28906493:28906937:-	-	-	-	-	-	-	0.48	0.14
Alternative 5' splice site	ENSG00000197989	SNHG12	1:28907158:28907606:-	0.25	-	-	-	-	0.14	0.28	0.31
Alternative 5' splice site	ENSG00000134644	PUM1	1:31414119:31414769:-	-	-	-	-	-	-0.11	-	-
Alternative 5' splice site	ENSG00000134644	PUM1	1:31418330:31422974:-	0.23	-	-	-	-	-	-	-
Alternative 5' splice site	ENSG00000134644	PUM1	1:31440157:31441144:-	-	-	-	-	-	-	0.28	-
Alternative 5' splice site	ENSG00000168528	SERINC2	1:31898764:31899501:+	-0.15	-	-0.17	-	-	-	-	-
Alternative 5' splice site	ENSG00000160051	IQCC	1:32671564:32671755:+	-	-	-	-	-	-	0.22	-
Alternative 5' splice site	ENSG00000160055	TMEM234	1:32686798:32687398:-	-	-	-	-	0.21	0.21	-	-
Alternative 5' splice site	ENSG00000176261	ZBTB8OS	1:33099673:33100303:-	0.22	0.12	-	-	0.18	-	-	-
Alternative 5' splice site	ENSG00000176261	ZBTB8OS	1:33099711:33100303:-	-	-	-	-	0.29	-	-	-
Alternative 5' splice site	ENSG00000116497	S100PBP	1:33291086:33291699:+	-	-	-	-	0.14	-	-	-
Alternative 5' splice site	ENSG00000142687	KIAA0319L	1:35913933:35915464:-	-	0.2	-	-	-	-	-	-
Alternative 5' splice site	ENSG00000020129	NCDN	1:36024085:36024708:+	0.11	0.11	-	0.25	0.16	0.2	-	-
Alternative 5' splice site	ENSG00000020129	NCDN	1:36024085:36024708:+	-	-	-	0.19	-	-	-	-
Alternative 5' splice site	ENSG00000116863	ADPRHL2	1:36558126:36558698:+	-	-0.21	-	-	-	-	-	-
Alternative 5' splice site	ENSG00000054116	TRAPPC3	1:36605767:36614693:-	-	-	0.31	0.22	0.3	0.18	0.27	0.17
Alternative 5' splice site	ENSG00000198912	C1orf174	1:3807621:3809305:-	-	0.14	0.19	0.24	-	-	0.19	-
Alternative 5' splice site	ENSG00000134690	CDCA8	1:38166197:38167426:+	-	-0.11	-	-0.11	-	-	-	-
Alternative 5' splice site	ENSG00000090621	PABPC4	1:40029413:40029505:-	-	-	-	-	-	-	0.11	-
Alternative 5' splice site	ENSG00000090621	PABPC4	1:40029413:40030095:-	-	-	-	-	-0.31	-0.2	-0.22	-0.13
Alternative 5' splice site	ENSG00000090621	PABPC4	1:40029594:40030095:-	-0.12	-	-	-	-	-	-	-
Alternative 5' splice site	ENSG00000090621	PABPC4	1:40035674:40036769:-	-	-	-	-	0.17	0.14	-0.14	-0.19
Alternative 5' splice site	ENSG00000084072	PPIE	1:40204603:40205837:+	-	-	-	-	-	-	0.23	-
Alternative 5' splice site	ENSG00000084072	PPIE	1:40214439:40214575:+	-	-	0.16	0.16	-	-	-	-
Alternative 5' splice site	ENSG00000043514	TRIT1	1:40313769:40315791:-	-	-	-	-	-	-	0.24	0.17
Alternative 5' splice site	ENSG00000131236	CAP1	1:40530235:40531887:+	-0.11	-	-	-	-	-	-	-0.11
Alternative 5' splice site	ENSG00000127125	PPCS	1:42923238:42925274:+	-	-	-	-	-0.22	-	-	-
Alternative 5' splice site	ENSG00000171960	PPIH	1:43125041:43125193:+	-	-	-	-	-	-	-0.11	-0.11
Alternative 5' splice site	ENSG00000117385	LEPRE1	1:43212523:43212924:-	-	-	-	-	0.38	-	0.23	0.15
Alternative 5' splice site	ENSG00000178922	HYI	1:43916982:43917081:-	-	0.35	-	-	-	0.13	-	-
Alternative 5' splice site	ENSG00000117408	IPO13	1:44426938:44429941:+	-	-	-	0.16	-	-	-	-
Alternative 5' splice site	ENSG00000132768	DPH2	1:44436489:44436638:+	-	-	-	-	0.27	-	0.37	-
Alternative 5' splice site	ENSG00000132768	DPH2	1:44436489:44436638:+	-	-	-	-	0.26	-	0.36	-
Alternative 5' splice site	ENSG00000132768	DPH2	1:44436892:44437059:+	-	-	-	-	-	-	0.14	-
Alternative 5' splice site	ENSG00000187147	RNF220	1:45101338:45101702:+	-	-	-	-	-	-	-	0.18
Alternative 5' splice site	ENSG00000126088	UROD	1:45478887:45478964:+	-	-	-	-0.15	-	-	-	-
Alternative 5' splice site	ENSG00000132780	NASP	1:46081147:46082009:+	-	-	-	-0.22	-	-	-	-
Alternative 5' splice site	ENSG00000117481	NSUN4	1:46807537:46810473:+	-	-	-	-	-0.22	-	-	-
Alternative 5' splice site	ENSG00000117481	NSUN4	1:46818704:46826376:+	-	-	-	-	-0.15	-	-	-
Alternative 5' splice site	ENSG00000117859	OSBPL9	1:52135486:52179675:+	-	-	-	-	-	-	0.28	-
Alternative 5' splice site	ENSG00000142856	ITGB3BP	1:63906774:63912472:-	-	-	-	-	-	-	0.19	-
Alternative 5' splice site	ENSG00000007923	DNAJC11	1:6697564:6698143:-	-	0.13	-	-	-	0.12	-	-
Alternative 5' splice site	ENSG00000198160	MIER1	1:67450335:67452086:+	-	-	-	-	-	-	-	-0.18
Alternative 5' splice site	ENSG00000142864	SERBP1	1:67885869:67889879:-	-0.11	-	-0.11	-	-	-	-	-
Alternative 5' splice site	ENSG00000197568	HHLA3	1:70820891:70832127:+	-	-	-	-	-	-	0.24	-
Alternative 5' splice site	ENSG00000132485	ZRANB2	1:71530820:71531361:-	-	-	-	-	-	-	0.22	-
Alternative 5' splice site	ENSG00000137955	RABGGTB	1:76252550:76253182:+	-	-	-	-	0.32	0.16	0.45	0.1
Alternative 5' splice site	ENSG00000142599	RERE	1:8424315:8424802:-	-	-	-	0.2	-	-	-	-
Alternative 5' splice site	ENSG00000188976	NOC2L	1:880180:880422:-	-	-	-	-	0.12	-	-	-
Alternative 5' splice site	ENSG00000187961	KLHL17	1:899560:899729:+	-	-	-	-	-	-	0.2	-
Alternative 5' splice site	ENSG00000171603	CLSTN1	1:9790763:9791180:-	-	-	-	-	0.11	-	-	-
Alternative 5' splice site	ENSG00000188157	AGRN	1:985713:985807:+	-0.11	-	-	-	0.12	0.24	-	-
Alternative 5' splice site	ENSG00000188157	AGRN	1:989935:990204:+	-	-	-	-	-	0.12	0.27	-
Alternative 5' splice site	ENSG00000107521	HPS1	10:100191048:100193697:-	-	-	-	-	-	-	-	-0.47
Alternative 5' splice site	ENSG00000155287	SLC25A28	10:101372356:101373173:-	-	-	0.11	-	-	0.12	0.23	-
Alternative 5' splice site	ENSG00000155287	SLC25A28	10:101372356:101373173:-	-	-	0.12	-	-	0.12	0.23	-
Alternative 5' splice site	ENSG00000055950	MRPL43	10:102746329:102746444:-	-	-	-	-	-	-	0.11	-
Alternative 5' splice site	ENSG00000107815	C10orf2	10:102750420:102750626:+	0.16	-	0.44	0.22	0.19	0.16	0.32	-
Alternative 5' splice site	ENSG00000107815	C10orf2	10:102750811:102752947:+	-	-	0.24	0.1	-	-	0.15	-
Alternative 5' splice site	ENSG00000120029	C10orf76	10:103789502:103792690:-	-	-	-	-	0.79	-	0.57	0.32
Alternative 5' splice site	ENSG00000166197	NOLC1	10:103919095:103919190:+	-	-	-	-	0.16	-	-	-
Alternative 5' splice site	ENSG00000107862	GBF1	10:104136897:104139041:+	-	-	-	-	0.15	-	0.14	-
Alternative 5' splice site	ENSG00000077150	NFKB2	10:104157446:104157738:+	-	-	-	-	-	-	0.11	-
Alternative 5' splice site	ENSG00000067064	IDI1	10:1087444:1088516:-	-	-	0.25	-	0.22	0.31	0.45	0.21
Alternative 5' splice site	ENSG00000148737	TCF7L2	10:114903784:114905770:+	-	-	-	-	-	-	0.26	0.27
Alternative 5' splice site	ENSG00000197771	MCMBP	10:121602107:121602760:-	-	-	-	-	0.2	-	-	-
Alternative 5' splice site	ENSG00000065665	SEC61A2	10:12203124:12204212:+	-	-	-	-	-0.13	-	-	-
Alternative 5' splice site	ENSG00000138162	TACC2	10:123848253:123892124:+	-	-	-	-	-	0.29	0.64	-
Alternative 5' splice site	ENSG00000138162	TACC2	10:123976436:123984241:+	-	-	-	-	0.41	0.28	0.28	0.28
Alternative 5' splice site	ENSG00000154473	BUB3	10:124922348:124923336:+	-	-	0.13	-	0.2	-	-	0.26
Alternative 5' splice site	ENSG00000183049	CAMK1D	10:12867693:12870768:+	-	-	-	-	-	0.19	-	-
Alternative 5' splice site	ENSG00000175470	PPP2R2D	10:133754345:133757472:+	-	-	-	-	-	-	0.11	-
Alternative 5' splice site	ENSG00000152464	RPP38	10:15139765:15145304:+	-	0.13	-	-	-	-	-	-
Alternative 5' splice site	ENSG00000136738	STAM	10:17735315:17737048:+	-	-	-	-	-	-	0.25	-
Alternative 5' splice site	ENSG00000095787	WAC	10:28823111:28824491:+	-	-	-	-	0.11	-	-	-
Alternative 5' splice site	ENSG00000170759	KIF5B	10:32308887:32309946:-	-	-	-	-	-	-	0.16	-
Alternative 5' splice site	ENSG00000148498	PARD3	10:34625171:34626203:-	-0.15	-	-	-	-	-	-	-0.26
Alternative 5' splice site	ENSG00000189180	ZNF33A	10:38305948:38306219:+	-	-	0.27	-	0.29	-	-	-
Alternative 5' splice site	ENSG00000169740	ZNF32	10:44140249:44141508:-	-	-	-	-	-	-0.18	-	-
Alternative 5' splice site	ENSG00000165568	AKR1E2	10:4889491:4889680:+	-	0.38	-	-	-	-	-	-
Alternative 5' splice site	ENSG00000096746	HNRNPH3	10:70098448:70098897:+	-	-	-	-	-	-	0.12	-
Alternative 5' splice site	ENSG00000099284	H2AFY2	10:71855514:71859964:+	-	0.12	-	-	-	-	-	-
Alternative 5' splice site	ENSG00000166295	ANAPC16	10:73983901:73992759:+	-	-	-	-	-	-0.22	-	-
Alternative 5' splice site	ENSG00000148719	DNAJB12	10:74094375:74095361:-	-	-	-	-	0.23	0.25	0.16	-
Alternative 5' splice site	ENSG00000148719	DNAJB12	10:74094375:74095538:-	-	-	-	-	0.12	0.15	0.17	0.12
Alternative 5' splice site	ENSG00000176986	SEC24C	10:75511027:75519380:+	-	-	-	-	-	-	0.11	-
Alternative 5' splice site	ENSG00000214655	ZSWIM8	10:75559952:75560054:+	-	-	-	-	-0.22	-	-	-
Alternative 5' splice site	ENSG00000148660	CAMK2G	10:75575005:75576773:-	0.11	0.16	-	0.13	-	-	-	-
Alternative 5' splice site	ENSG00000108179	PPIF	10:81111470:81112073:+	-	-	0.11	-	-	0.17	0.39	-
Alternative 5' splice site	ENSG00000225484	RP11-773D16.1	10:81565878:81568515:-	-	-	-	-	-	-	-0.27	-
Alternative 5' splice site	ENSG00000122359	ANXA11	10:81923899:81925838:-	-	-	-0.13	-	-	-	-	-
Alternative 5' splice site	ENSG00000107929	LARP4B	10:859153:860577:-	0.18	0.14	0.2	0.15	0.2	-	0.18	-
Alternative 5' splice site	ENSG00000171311	EXOSC1	10:99197507:99198420:-	-	-	-	-	-0.12	-	-	-
Alternative 5' splice site	ENSG00000155256	ZFYVE27	10:99497082:99498234:+	-	-	-	-	0.25	-	-	-
Alternative 5' splice site	ENSG00000137693	YAP1	11:102056868:102076624:+	-	-0.16	-	-	-	-	-	-
Alternative 5' splice site	ENSG00000137693	YAP1	11:102076817:102080248:+	-	-	-	-	0.5	0.2	0.54	0.15
Alternative 5' splice site	ENSG00000137693	YAP1	11:102076817:102094353:+	-	-	-	-	0.34	0.19	0.41	-
Alternative 5' splice site	ENSG00000150779	TIMM8B	11:111956186:111956691:-	-	-	0.11	-	-	-	0.17	-
Alternative 5' splice site	ENSG00000204370	SDHD	11:111959739:111965529:+	-0.14	-	-	-0.14	-	-	-	-0.13
Alternative 5' splice site	ENSG00000110344	UBE4A	11:118243402:118243801:+	0.23	-	0.12	0.21	-	-	-	-
Alternative 5' splice site	ENSG00000186166	CCDC84	11:118869876:118881474:+	-	-	-	-	0.28	-	-	-
Alternative 5' splice site	ENSG00000196655	TRAPPC4	11:118890134:118890860:+	-	-	0.13	-	-0.12	-	-	-0.16
Alternative 5' splice site	ENSG00000196655	TRAPPC4	11:118890134:118890860:+	-	-	0.13	-	-0.13	-	-	-0.16
Alternative 5' splice site	ENSG00000256269	HMBS	11:118955867:118958965:+	-	-	-	0.13	-	-	-	-
Alternative 5' splice site	ENSG00000256269	HMBS	11:118959558:118959792:+	-	-	-	-	0.15	-	-	-
Alternative 5' splice site	ENSG00000172269	DPAGT1	11:118971118:118971336:-	-	-	0.11	-	-	-	-	-
Alternative 5' splice site	ENSG00000149547	EI24	11:125448157:125448845:+	-	-	0.13	0.11	-	-	-	-
Alternative 5' splice site	ENSG00000078902	TOLLIP	11:1298483:1307228:-	-	0.17	0.21	-	-	-	-	-
Alternative 5' splice site	ENSG00000196323	ZBTB44	11:130104168:130106688:-	-	0.28	-	-	-	0.19	-	-0.25
Alternative 5' splice site	ENSG00000110619	CARS	11:3022478:3023192:-	0.18	-	-	-	-	-	-	-
Alternative 5' splice site	ENSG00000110619	CARS	11:3039979:3040365:-	-0.32	-0.2	-0.24	-	-	-	-	-
Alternative 5' splice site	ENSG00000110713	NUP98	11:3774638:3781718:-	-	-	-	-	0.25	0.13	0.17	-
Alternative 5' splice site	ENSG00000148985	PGAP2	11:3845685:3846250:+	-	-	-	-	0.39	-	-	-
Alternative 5' splice site	ENSG00000185187	SIGIRR	11:408893:409860:-	-	-	-	0.16	-	-	-	-
Alternative 5' splice site	ENSG00000167325	RRM1	11:4144618:4147914:+	-	-	-0.14	-	-	-	-	-
Alternative 5' splice site	ENSG00000109920	FNBP4	11:47786914:47788615:-	-0.14	-	-	-0.14	-	-	-	-
Alternative 5' splice site	ENSG00000030066	NUP160	11:47813542:47814291:-	-	-	-	-	0.14	0.16	0.33	-
Alternative 5' splice site	ENSG00000030066	NUP160	11:47833981:47834419:-	0.14	-	-	-	-	-	-	-
Alternative 5' splice site	ENSG00000213593	TMX2	11:57506515:57506603:+	-	-	0.11	0.11	-	-	-	-
Alternative 5' splice site	ENSG00000198561	CTNND1	11:57529591:57556509:+	-	-	-	-	-	-	0.45	0.11
Alternative 5' splice site	ENSG00000198561	CTNND1	11:57529591:57561482:+	-	-	-	-	-	-	0.27	-
Alternative 5' splice site	ENSG00000149532	CPSF7	11:61189080:61196370:-	0.12	-	0.17	0.11	0.28	-	0.27	-
Alternative 5' splice site	ENSG00000149503	INCENP	11:61913235:61914130:+	-	-	0.26	-	-	-	-	-
Alternative 5' splice site	ENSG00000051009	FAM160A2	11:6239380:6239788:-	-	-	-	-	-	0.17	-	0.2
Alternative 5' splice site	ENSG00000162191	UBXN1	11:62445106:62445212:-	0.13	-	-	-	0.13	-	-	-
Alternative 5' splice site	ENSG00000162191	UBXN1	11:62445106:62445212:-	0.14	-	-	-	0.13	-	-	-
Alternative 5' splice site	ENSG00000162236	STX5	11:62591759:62591911:-	-	-	-	-	0.15	-	-	-
Alternative 5' splice site	ENSG00000133316	WDR74	11:62606900:62606979:-	-	-	-	-	-0.27	-	-	-
Alternative 5' splice site	ENSG00000255717	SNHG1	11:62620153:62620279:-	-	-	-	-	-	-	0.16	-
Alternative 5' splice site	ENSG00000255717	SNHG1	11:62622023:62622360:-	-	-0.21	-	-0.1	-0.16	-0.21	-0.14	-0.13
Alternative 5' splice site	ENSG00000162302	RPS6KA4	11:64126921:64127635:+	-	-	-	-	-0.13	-	-	-
Alternative 5' splice site	ENSG00000166311	SMPD1	11:6413426:6414446:+	-	-	-	-	0.11	-	-	-
Alternative 5' splice site	ENSG00000168066	SF1	11:64534723:64535039:-	-	-	-	-	0.29	-	-	-
Alternative 5' splice site	ENSG00000110025	SNX15	11:64799743:64799903:+	-	-	-	-	0.15	-	-	-
Alternative 5' splice site	ENSG00000126391	FRMD8	11:65154712:65156832:+	0.32	-	0.35	0.43	0.73	0.1	0.37	-
Alternative 5' splice site	ENSG00000172732	MUS81	11:65631559:65631968:+	-	-	-	-	-	-	0.18	-
Alternative 5' splice site	ENSG00000172638	EFEMP2	11:65634183:65634281:-	-	-	-	-	-	0.19	-	-
Alternative 5' splice site	ENSG00000172638	EFEMP2	11:65634183:65634281:-	-	-	-	-	-	0.19	-	-
Alternative 5' splice site	ENSG00000172500	FIBP	11:65651514:65651782:-	-	-	-	-	0.15	-	-	-
Alternative 5' splice site	ENSG00000172500	FIBP	11:65652657:65652980:-	-	-	-	-	0.15	-	-	0.12
Alternative 5' splice site	ENSG00000175376	EIF1AD	11:65767877:65769381:-	-	-	-	0.22	-	-	0.11	-
Alternative 5' splice site	ENSG00000175376	EIF1AD	11:65767952:65769381:-	0.21	-	0.22	-	-	-	-	-
Alternative 5' splice site	ENSG00000175376	EIF1AD	11:65767976:65769381:-	-	-	0.24	0.28	-	-	-	-
Alternative 5' splice site	ENSG00000087365	SF3B2	11:65822795:65823009:+	0.15	0.18	-	-	-	-	-	-
Alternative 5' splice site	ENSG00000174547	MRPL11	11:66205730:66206103:-	-	-	-	-	-	-0.26	-0.3	-
Alternative 5' splice site	ENSG00000166340	TPP1	11:6640146:6640423:-	-	-	-	-	-	-	0.14	-
Alternative 5' splice site	ENSG00000173715	C11orf80	11:66568632:66571466:+	-	-	-	0.38	-	-	-	-
Alternative 5' splice site	ENSG00000110711	AIP	11:67254658:67256738:+	-	-	-	0.33	-0.2	-	-	-
Alternative 5' splice site	ENSG00000197345	MRPL21	11:68660461:68660790:-	0.16	-	-	-	-	-	-	-
Alternative 5' splice site	ENSG00000197345	MRPL21	11:68660923:68663937:-	-	-	-	0.14	0.35	-	0.19	-
Alternative 5' splice site	ENSG00000132740	IGHMBP2	11:68673852:68675613:+	-	-	-	-	0.29	0.18	0.79	0.21
Alternative 5' splice site	ENSG00000110200	ANAPC15	11:71822332:71822458:-	-	-	-	-0.18	-	-	-	-
Alternative 5' splice site	ENSG00000077514	POLD3	11:74304082:74305106:+	-	-	-	-	0.11	-	-	-
Alternative 5' splice site	ENSG00000177225	PDDC1	11:772521:773428:-	-	-	-	-	0.11	-	-	-
Alternative 5' splice site	ENSG00000175390	EIF3F	11:8013518:8013631:+	0.15	-	-	0.13	-	-	-	-0.19
Alternative 5' splice site	ENSG00000165494	PCF11	11:82878940:82879470:+	-	-	-	-0.22	-	-	-	-
Alternative 5' splice site	ENSG00000171202	TMEM126A	11:85365300:85366638:+	-0.13	-	-	-	-	-	-	-
Alternative 5' splice site	ENSG00000087053	MTMR2	11:95595530:95598604:-	-	-	-	-	-	-	0.26	-
Alternative 5' splice site	ENSG00000087053	MTMR2	11:95595530:95598604:-	-	-	-	-	-	-	0.29	-
Alternative 5' splice site	ENSG00000075089	ACTR6	12:100594838:100598718:+	-	-	-	-	0.29	-	0.3	-
Alternative 5' splice site	ENSG00000111666	CHPT1	12:102120275:102122679:+	-	-	-	-	-	-	-	-0.12
Alternative 5' splice site	ENSG00000002016	RAD52	12:1034691:1035962:-	-	-	-	-	-	0.2	0.57	-
Alternative 5' splice site	ENSG00000139428	MMAB	12:109999657:110002767:-	0.19	-	-	-	0.25	-	-	-
Alternative 5' splice site	ENSG00000204842	ATXN2	12:111908546:111923069:-	-	-	-	-	0.24	-	-	0.21
Alternative 5' splice site	ENSG00000204842	ATXN2	12:111956231:111957636:-	-	0.13	-	-	0.17	0.16	0.17	-
Alternative 5' splice site	ENSG00000089022	MAPKAPK5	12:112326810:112327844:+	-	-	-	0.13	0.31	-	0.22	-
Alternative 5' splice site	ENSG00000135148	TRAFD1	12:112563953:112568315:+	0.13	-	0.12	-	-	-	-	-
Alternative 5' splice site	ENSG00000111331	OAS3	12:113405985:113407413:+	-	-	-	-	-	0.16	-	-
Alternative 5' splice site	ENSG00000135108	FBXO21	12:117612146:117612454:-	-	-	-	0.14	-	-	-	-
Alternative 5' splice site	ENSG00000175727	MLXIP	12:122622846:122622971:+	-	-	-	0.15	-	-	-	-
Alternative 5' splice site	ENSG00000111011	RSRC2	12:123003576:123005843:-	-	-	-	0.19	-	-	-	-
Alternative 5' splice site	ENSG00000111011	RSRC2	12:123005975:123006674:-	-	-	-	-	-	-	-	0.11
Alternative 5' splice site	ENSG00000111325	OGFOD2	12:123462746:123462907:+	-	-	-	-	-	0.13	-	-
Alternative 5' splice site	ENSG00000111325	OGFOD2	12:123463120:123463300:+	-	0.16	-	-	-	-	-	-
Alternative 5' splice site	ENSG00000182196	ARL6IP4	12:123465846:123466118:+	0.17	-	-	-	-	-	-	-
Alternative 5' splice site	ENSG00000130921	C12orf65	12:123739580:123741360:+	-	-	-	-	-	-	0.13	-
Alternative 5' splice site	ENSG00000196498	NCOR2	12:124810916:124811955:-	-	-	-	-	-	-	-	-0.13
Alternative 5' splice site	ENSG00000061936	SFSWAP	12:132198785:132199367:+	-	-	-	0.11	-	-	-	-
Alternative 5' splice site	ENSG00000185163	DDX51	12:132625565:132625648:-	0.35	0.17	0.17	0.32	0.21	0.18	0.19	-
Alternative 5' splice site	ENSG00000177084	POLE	12:133248908:133249166:-	-	-	-	0.23	-	-	-	-0.13
Alternative 5' splice site	ENSG00000090615	GOLGA3	12:133350906:133351652:-	-	-	-	0.11	-	-	-	-
Alternative 5' splice site	ENSG00000023697	DERA	12:16115885:16135242:+	-	-	-	-	-	-	-0.2	-0.19
Alternative 5' splice site	ENSG00000023697	DERA	12:16135376:16185476:+	-	-	-	-	-	0.12	-	-
Alternative 5' splice site	ENSG00000111726	CMAS	12:22215372:22218055:+	-	-	-	0.11	-	-	-	-
Alternative 5' splice site	ENSG00000013573	DDX11	12:31242424:31242820:+	-	-	-	-	0.34	0.2	0.31	0.32
Alternative 5' splice site	ENSG00000139146	FAM60A	12:31451158:31457916:-	-	-	-	-	-	-	-	-0.24
Alternative 5' splice site	ENSG00000151239	TWF1	12:44193305:44194227:-	-	-	-	-	-0.14	-	-	-
Alternative 5' splice site	ENSG00000139218	SCAF11	12:46316365:46316715:-	0.12	-	-	-	-	-	-	-
Alternative 5' splice site	ENSG00000111371	SLC38A1	12:46637097:46662309:-	-	-	0.22	0.22	-	-	-	-
Alternative 5' splice site	ENSG00000061273	HDAC7	12:48181947:48183040:-	0.11	-	-	-	-	-	-	-
Alternative 5' splice site	ENSG00000111424	VDR	12:48258960:48272599:-	-	-	-	-	0.2	-	-	0.11
Alternative 5' splice site	ENSG00000152556	PFKM	12:48524223:48525099:+	-	-	-	0.16	-	-	-	-
Alternative 5' splice site	ENSG00000167528	ZNF641	12:48739257:48740932:-	-	-	-	-	0.22	-	-	-
Alternative 5' splice site	ENSG00000167548	MLL2	12:49437781:49437974:-	-0.27	-	-0.24	-	-0.19	-0.26	-	-
Alternative 5' splice site	ENSG00000139624	CERS5	12:50524477:50528183:-	-	-	-	-	0.19	0.21	-	-
Alternative 5' splice site	ENSG00000123268	ATF1	12:51203376:51207793:+	-	-	-	-	-	-	0.13	-
Alternative 5' splice site	ENSG00000110911	SLC11A2	12:51375586:51382083:-	-	-	-	-	-	-	0.2	-
Alternative 5' splice site	ENSG00000123395	C12orf44	12:52464026:52464138:+	-	-	-	-	-	-	-0.53	-
Alternative 5' splice site	ENSG00000111077	TENC1	12:53452638:53452831:+	-	-	-	-	-	0.13	-	-
Alternative 5' splice site	ENSG00000139651	ZNF740	12:53575974:53578675:+	-	-	-	0.21	-	0.11	0.16	-
Alternative 5' splice site	ENSG00000135476	ESPL1	12:53662712:53662808:+	-	-	-	-	0.14	0.14	0.2	-
Alternative 5' splice site	ENSG00000123349	PFDN5	12:53689732:53690028:+	-	-	-	0.11	-	-	-	-
Alternative 5' splice site	ENSG00000139546	TARBP2	12:53896996:53897497:+	-	-	0.21	0.11	0.16	-	0.14	-
Alternative 5' splice site	ENSG00000139546	TARBP2	12:53896996:53897514:+	-	-	0.51	-	-	-	-	-
Alternative 5' splice site	ENSG00000170653	ATF7	12:53931336:53936871:-	-	0.22	-	0.33	-	-	-	-
Alternative 5' splice site	ENSG00000170653	ATF7	12:53931336:53937081:-	0.19	-	-	0.42	-	-	-	-
Alternative 5' splice site	ENSG00000229117	RPL41	12:56510714:56510973:+	-	-	0.17	0.13	-	-	-	-
Alternative 5' splice site	ENSG00000229117	RPL41	12:56510714:56510973:+	-	-	0.15	0.11	-	-	0.19	-
Alternative 5' splice site	ENSG00000229117	RPL41	12:56510999:56511266:+	-	-	-	-	-	0.15	0.19	-
Alternative 5' splice site	ENSG00000139613	SMARCC2	12:56557549:56558087:-	-	-	-	-	-0.19	-	-	-
Alternative 5' splice site	ENSG00000170581	STAT2	12:56745234:56748203:-	-	-	-	0.21	-	-	-	-
Alternative 5' splice site	ENSG00000076067	RBMS2	12:56981448:56982078:+	-	-	-	-	-	-0.2	-	-
Alternative 5' splice site	ENSG00000110955	ATP5B	12:57037371:57037617:-	-	-	-	-	-0.14	-	-0.13	-
Alternative 5' splice site	ENSG00000166888	STAT6	12:57502082:57503724:-	-	-	-	-	-	0.15	-	-
Alternative 5' splice site	ENSG00000166986	MARS	12:57882896:57883050:+	-	-	-	-	-0.13	-	-0.11	-
Alternative 5' splice site	ENSG00000166986	MARS	12:57909941:57910028:+	-	-	-	-	0.16	-	-	-
Alternative 5' splice site	ENSG00000175203	DCTN2	12:57927086:57927732:-	-	-	-	0.13	-	-	-	-
Alternative 5' splice site	ENSG00000123297	TSFM	12:58177068:58179946:+	-	-	-	-0.19	-	-	-	-
Alternative 5' splice site	ENSG00000175215	CTDSP2	12:58220880:58221317:-	0.18	-	0.12	-	0.33	-	-	-
Alternative 5' splice site	ENSG00000111653	ING4	12:6761936:6762102:-	-	-	-	-	-0.13	-0.14	-	-
Alternative 5' splice site	ENSG00000159335	PTMS	12:6878842:6879010:+	-	-	-	-	-	-	0.42	0.43
Alternative 5' splice site	ENSG00000127314	RAP1B	12:69004832:69018451:+	-	-	-	-	0.19	-	-	-
Alternative 5' splice site	ENSG00000111581	NUP107	12:69128617:69129011:+	-	-	-	-	-	-	0.15	-
Alternative 5' splice site	ENSG00000135679	MDM2	12:69203076:69207334:+	0.26	-	0.18	0.27	-	-	-	-
Alternative 5' splice site	ENSG00000111667	USP5	12:6972541:6972994:+	-	-	-	-	0.15	-	-	-
Alternative 5' splice site	ENSG00000215021	PHB2	12:7074875:7075578:-	-	-0.45	-0.16	-	-	-0.33	-0.56	-0.58
Alternative 5' splice site	ENSG00000139197	PEX5	12:7343165:7343484:+	-	-	-	-	0.36	0.18	-	-
Alternative 5' splice site	ENSG00000187109	NAP1L1	12:76449938:76453574:-	-	-0.14	-	-	0.18	-	-	-
Alternative 5' splice site	ENSG00000111788	RP11-22B23.1	12:9451463:9451856:+	-	-	-	-	-	-0.12	-	0.18
Alternative 5' splice site	ENSG00000214826	DDX12P	12:9571525:9571605:-	-	-	-	-	-	-	-0.66	-
Alternative 5' splice site	ENSG00000075415	SLC25A3	12:98989439:98991634:+	-	-	-	-	-	-	-0.12	-0.15
Alternative 5' splice site	ENSG00000213995	CARKD	13:111287482:111287815:+	0.16	-	0.2	0.18	0.21	0.12	0.29	-
Alternative 5' splice site	ENSG00000213995	CARKD	13:111287974:111289476:+	-	-	-	-	-	-	0.48	-
Alternative 5' splice site	ENSG00000134905	CARS2	13:111299586:111302984:-	-	0.11	-	-	0.11	-	-	-
Alternative 5' splice site	ENSG00000088448	ANKRD10	13:111532459:111535900:-	-	-	-	-	0.45	-	0.36	-
Alternative 5' splice site	ENSG00000088448	ANKRD10	13:111532459:111535900:-	-	-	-	-	0.45	-	0.35	-
Alternative 5' splice site	ENSG00000126226	PCID2	13:113832601:113833276:-	-	-	-	-	-	-	0.16	-
Alternative 5' splice site	ENSG00000126226	PCID2	13:113839874:113845182:-	-	-	-	-	0.11	-	-	-
Alternative 5' splice site	ENSG00000126226	PCID2	13:113852578:113854695:-	-	-	-	-	0.12	-	-	-
Alternative 5' splice site	ENSG00000198176	TFDP1	13:114292211:114294435:+	-	-	-	-0.16	-	-	-0.15	-
Alternative 5' splice site	ENSG00000139514	SLC7A1	13:30093686:30096450:-	-	-	0.15	-	-	-	-	-
Alternative 5' splice site	ENSG00000102804	TSC22D1	13:45009019:45009929:-	-	-	0.24	0.2	-	-	0.33	-
Alternative 5' splice site	ENSG00000231607	DLEU2	13:50571555:50601343:-	-	-	-	-	0.24	-	-	-
Alternative 5' splice site	ENSG00000188243	COMMD6	13:76104402:76111620:-	0.18	-	-	-	0.54	-	-	-
Alternative 5' splice site	ENSG00000118939	UCHL3	13:76141452:76143596:+	-	-	-	-	-	-0.19	-	-
Alternative 5' splice site	ENSG00000126214	KLC1	14:104124117:104128453:+	-	-	-	-	-	-	-	0.14
Alternative 5' splice site	ENSG00000179364	PACS2	14:105848395:105848814:+	-	-	-0.11	-	-	-	-	-
Alternative 5' splice site	ENSG00000182979	MTA1	14:105911852:105915696:+	0.16	0.14	-	-	-	-	-	-
Alternative 5' splice site	ENSG00000092094	OSGEP	14:20916970:20917061:-	-	0.4	-	-	-	-	-	-
Alternative 5' splice site	ENSG00000100823	APEX1	14:20923587:20923737:+	-	-	-	-	-	-	0.16	-
Alternative 5' splice site	ENSG00000165782	TMEM55B	14:20929004:20929322:-	-	-	-	-	0.16	-	-	0.19
Alternative 5' splice site	ENSG00000165792	METTL17	14:21458546:21458623:+	-	-	-	0.13	-	-	-	-
Alternative 5' splice site	ENSG00000092199	HNRNPC	14:21698525:21699117:-	0.18	-	-	-	0.27	0.16	-	-
Alternative 5' splice site	ENSG00000092199	HNRNPC	14:21698525:21699117:-	0.19	-	-	-	0.27	0.16	-	-
Alternative 5' splice site	ENSG00000100462	PRMT5	14:23389940:23390049:-	-	0.18	-	-	-	-	-	-
Alternative 5' splice site	ENSG00000092036	HAUS4	14:23424385:23425955:-	-	-	-	-	0.26	-	-	-
Alternative 5' splice site	ENSG00000259431	THTPA	14:24026513:24027904:+	0.25	-	-	-	-	-	-	-
Alternative 5' splice site	ENSG00000100889	PCK2	14:24564054:24566101:+	-	-	-	-	0.11	-	-	-
Alternative 5' splice site	ENSG00000100897	DCAF11	14:24584502:24584752:+	0.11	-	-	-	-	-	-	-
Alternative 5' splice site	ENSG00000092098	RNF31	14:24617686:24617851:+	0.3	0.11	0.26	0.29	0.26	-	0.46	0.23
Alternative 5' splice site	ENSG00000129559	NEDD8	14:24686429:24687265:-	0.11	-	-	-	0.15	-	-	-
Alternative 5' splice site	ENSG00000129559	NEDD8	14:24686429:24687265:-	0.11	-	-	-	0.15	-	-	-
Alternative 5' splice site	ENSG00000100938	GMPR2	14:24702053:24702425:+	0.21	0.1	0.13	0.23	0.34	-	-	-
Alternative 5' splice site	ENSG00000100949	RABGGTA	14:24736982:24737072:-	-	-	0.19	-	-	-	-	-
Alternative 5' splice site	ENSG00000092148	HECTD1	14:31590711:31592120:-	-	-	-	0.19	-	-	-	-
Alternative 5' splice site	ENSG00000151327	FAM177A1	14:35516160:35519239:+	-	-	-	-	0.18	-	-	-
Alternative 5' splice site	ENSG00000151327	FAM177A1	14:35516160:35522484:+	-	-	-	-	0.27	-0.17	-	-
Alternative 5' splice site	ENSG00000125375	ATP5S	14:50789524:50790663:+	0.25	-	0.36	-	-	-	-	-
Alternative 5' splice site	ENSG00000139921	TMX1	14:51710694:51712031:+	-	-	-	-	-0.14	-0.17	-0.13	-
Alternative 5' splice site	ENSG00000100519	PSMC6	14:53174247:53175027:+	-	-	-	-	-	0.18	0.14	-
Alternative 5' splice site	ENSG00000100714	MTHFD1	14:64906988:64908103:+	-	-	-	-	-	-0.28	-	-
Alternative 5' splice site	ENSG00000100650	SRSF5	14:70234097:70234855:+	0.28	0.15	0.27	0.13	0.21	0.15	0.2	-
Alternative 5' splice site	ENSG00000006432	MAP3K9	14:71205115:71206615:-	0.14	-	0.24	0.17	0.29	-	-	-
Alternative 5' splice site	ENSG00000080815	PSEN1	14:73614814:73637505:+	-0.16	-	-	-	-	0.18	-	-
Alternative 5' splice site	ENSG00000119725	ZNF410	14:74358911:74360500:+	-	-	-	-	-	-	-0.13	-0.14
Alternative 5' splice site	ENSG00000119688	ABCD4	14:74763152:74764342:-	-	-	-	-	-0.14	-0.11	-	-
Alternative 5' splice site	ENSG00000119655	NPC2	14:74946991:74947389:-	-	-	0.16	-	-	-	-	-
Alternative 5' splice site	ENSG00000119655	NPC2	14:74946991:74947389:-	-	-	0.18	-	-	-	-	-
Alternative 5' splice site	ENSG00000119616	FCF1	14:75180323:75181575:+	-	-	-	0.11	-	-	0.19	-
Alternative 5' splice site	ENSG00000119718	EIF2B2	14:75472668:75473280:+	-	-	-	-	-	0.12	-	-
Alternative 5' splice site	ENSG00000119640	ACYP1	14:75520362:75530169:-	-	-	-	-	-	-	-0.2	-
Alternative 5' splice site	ENSG00000170348	TMED10	14:75601709:75602366:-	0.14	-	0.11	0.13	0.33	-	0.13	-
Alternative 5' splice site	ENSG00000170345	FOS	14:75747374:75747486:+	-	-	0.16	-	0.16	-	-	0.11
Alternative 5' splice site	ENSG00000009830	POMT2	14:77771143:77772589:-	0.12	0.14	0.24	0.25	0.64	-	0.42	-
Alternative 5' splice site	ENSG00000151445	VIPAS39	14:77920445:77923438:-	0.15	-	-	-	-	-	-	-
Alternative 5' splice site	ENSG00000100722	ZC3H14	14:89069404:89073587:+	-	-	-	-0.21	-	-	-	-
Alternative 5' splice site	ENSG00000100796	SMEK1	14:91939714:91942155:-	-	-	-	0.21	0.15	-	-	-
Alternative 5' splice site	ENSG00000165929	TC2N	14:92280169:92302527:-	0.21	-	0.3	0.27	-	-	-	-
Alternative 5' splice site	ENSG00000165948	IFI27L1	14:94568405:94568823:+	-	-	-	-	0.18	-	-	0.18
Alternative 5' splice site	ENSG00000090061	CCNK	14:99947951:99958963:+	0.26	-	0.27	0.15	-	-	-	-
Alternative 5' splice site	ENSG00000184277	TM2D3	15:102185365:102186924:-	-	-	-	0.11	-	-	-	-
Alternative 5' splice site	ENSG00000140157	NIPA2	15:23033413:23034121:-	-	-	-	0.2	-	-	-	-
Alternative 5' splice site	ENSG00000140181	HERC2P2	15:23310147:23311162:-	0.51	-	-	0.16	-	-	-	-
Alternative 5' splice site	ENSG00000114062	UBE3A	15:25584404:25585228:-	-	-	-	-	-0.17	-0.17	-0.21	-
Alternative 5' splice site	ENSG00000104067	TJP1	15:29993893:29996366:-	-	-	-0.2	-	-	-	-	-
Alternative 5' splice site	ENSG00000198826	ARHGAP11A	15:32921963:32925180:+	-	-	-	-0.17	-	-	-	-
Alternative 5' splice site	ENSG00000248508	RP11-521C20.4	15:40331791:40338162:+	-	-	-	-	0.36	0.21	-	-
Alternative 5' splice site	ENSG00000128928	IVD	15:40700011:40700138:+	-	-	0.12	-	0.17	0.12	-	-
Alternative 5' splice site	ENSG00000104129	DNAJC17	15:41066634:41067166:-	-	0.13	-	-	-	-	-	-
Alternative 5' splice site	ENSG00000104129	DNAJC17	15:41068825:41071282:-	-	-	-	-	-	-	0.12	-0.12
Alternative 5' splice site	ENSG00000104129	DNAJC17	15:41071801:41072049:-	-	-	0.16	-	-	-	-	-
Alternative 5' splice site	ENSG00000247556	OIP5-AS1	15:41576486:41577423:+	0.11	-	-	-	-	-	-	-
Alternative 5' splice site	ENSG00000137804	NUSAP1	15:41643345:41648237:+	-	-	-	-	0.57	-	0.32	0.22
Alternative 5' splice site	ENSG00000168781	PPIP5K1	15:43865346:43865555:-	-	-	-	-	-	-	-	0.16
Alternative 5' splice site	ENSG00000167004	PDIA3	15:44055408:44057648:+	-	-	-	-	0.11	-	-	-
Alternative 5' splice site	ENSG00000171763	SPATA5L1	15:45708007:45709467:+	-	0.15	-	-	-	-	-	-0.21
Alternative 5' splice site	ENSG00000128951	DUT	15:48626709:48628243:+	0.15	-	-	-	-	-0.12	-0.12	-
Alternative 5' splice site	ENSG00000104064	GABPB1	15:50593099:50593418:-	0.21	-	-	0.3	-	-	0.19	-
Alternative 5' splice site	ENSG00000138592	USP8	15:50716851:50731206:+	0.36	-	0.38	-	-	-	-	-
Alternative 5' splice site	ENSG00000092439	TRPM7	15:50868116:50870756:-	0.13	-	-	-	-	-	-	-
Alternative 5' splice site	ENSG00000138594	TMOD3	15:52201073:52203237:+	-	-	-	-	0.21	-	0.2	0.17
Alternative 5' splice site	ENSG00000128833	MYO5C	15:52548917:52553059:-	-0.12	-	-	-	-	-	-	-
Alternative 5' splice site	ENSG00000047346	FAM214A	15:52877141:52879253:-	-	-0.15	-	-	-	-	-	-
Alternative 5' splice site	ENSG00000174446	SNAPC5	15:66783055:66786615:-	-	-	-	-	-	-	0.14	-
Alternative 5' splice site	ENSG00000174446	SNAPC5	15:66786890:66787241:-	-	-	-	-	-	-	0.11	-
Alternative 5' splice site	ENSG00000103591	AAGAB	15:67529158:67546567:-	0.13	-	-	0.14	0.34	-	-	-
Alternative 5' splice site	ENSG00000128973	CLN6	15:68503656:68503894:-	-	-	-	-	-0.15	-	-0.19	-0.21
Alternative 5' splice site	ENSG00000140332	TLE3	15:70348713:70349798:-	0.18	0.13	-	-	0.21	-	0.28	0.13
Alternative 5' splice site	ENSG00000140332	TLE3	15:70358557:70366842:-	-	-	0.2	-0.13	0.19	-	0.15	0.17
Alternative 5' splice site	ENSG00000137817	PARP6	15:72552002:72552819:-	-	-	-	-	0.12	-	-	-
Alternative 5' splice site	ENSG00000137817	PARP6	15:72557512:72557611:-	-	-	-	-	-	-	-0.13	-
Alternative 5' splice site	ENSG00000140464	PML	15:74325763:74326819:+	-	-	-	-	-	0.18	-	0.17
Alternative 5' splice site	ENSG00000255769	RP11-152F13.3	15:82769264:82769344:-	-	-	-	-	-0.11	-	-	-
Alternative 5' splice site	ENSG00000177082	WDR73	15:85189067:85189204:-	-	-	0.3	0.15	-	-	0.28	-
Alternative 5' splice site	ENSG00000181991	MRPS11	15:89012376:89015858:+	0.37	0.22	0.46	0.42	0.66	0.2	0.33	-
Alternative 5' splice site	ENSG00000140525	FANCI	15:89858665:89859628:+	-	-	-	-	-0.12	-0.12	-	-
Alternative 5' splice site	ENSG00000140521	POLG	15:89877144:89877904:-	-	-	-	0.23	0.17	-	-	-
Alternative 5' splice site	ENSG00000185033	SEMA4B	15:90768659:90768893:+	-	-	-	-	0.15	-	-	-
Alternative 5' splice site	ENSG00000196547	MAN2A2	15:91456636:91456844:+	-	-	-	-	-	-	-	-0.18
Alternative 5' splice site	ENSG00000198901	PRC1	15:91510432:91512677:-	-	-	-	0.21	0.18	-	-	-
Alternative 5' splice site	ENSG00000184056	VPS33B	15:91557101:91557610:-	-	-0.21	-	-	-	-	-	-
Alternative 5' splice site	ENSG00000122299	ZC3H7A	16:11873219:11875264:-	0.22	-	-	-	-	-	-	-
Alternative 5' splice site	ENSG00000103148	NPRL3	16:134594:135820:-	-	-	-	-	-	-	0.14	-
Alternative 5' splice site	ENSG00000103275	UBE2I	16:1362668:1364021:+	-	-	-	-	0.18	-	-	-
Alternative 5' splice site	ENSG00000007520	TSR3	16:1400235:1400804:-	-	-	-	0.13	-	-	-	-
Alternative 5' splice site	ENSG00000059145	UNKL	16:1417859:1419935:-	-	-	-	0.21	-	-	0.5	-
Alternative 5' splice site	ENSG00000183426	NPIP	16:15043793:15043907:+	-	-	-	-	0.11	-	-	-
Alternative 5' splice site	ENSG00000157045	NTAN1	16:15138264:15141275:-	-	-	-	-	0.14	-	-	-
Alternative 5' splice site	ENSG00000183889	PKD1P1	16:16422212:16422508:+	0.53	-	-	-	-	-	-	-
Alternative 5' splice site	ENSG00000183889	PKD1P1	16:16422373:16422508:+	0.53	-	-	-	-	-	-	-
Alternative 5' splice site	ENSG00000183889	PKD1P1	16:16423097:16423222:+	0.3	-	-	-	-	-	-	-
Alternative 5' splice site	ENSG00000183889	PKD1P1	16:16429994:16434163:+	0.47	-0.18	-	-	-	-	-	-
Alternative 5' splice site	ENSG00000162032	SPSB3	16:1828613:1831194:-	-	-	-	-	0.2	-	0.29	-
Alternative 5' splice site	ENSG00000233024	PKD1P1	16:18462243:18466435:-	-	-	-0.34	-	-	-	-	-
Alternative 5' splice site	ENSG00000134419	RPS15A	16:18800440:18801566:-	0.32	-	-	-	0.32	-	0.11	-
Alternative 5' splice site	ENSG00000157106	SMG1	16:18879676:18879845:-	0.13	-	-	-	-	-	-	-
Alternative 5' splice site	ENSG00000140740	UQCRC2	16:21987568:21991868:+	-	-	-	-	0.16	-	-	-
Alternative 5' splice site	ENSG00000131653	TRAF7	16:2218321:2220615:+	-	-	0.16	0.14	0.41	-	0.16	0.14
Alternative 5' splice site	ENSG00000103319	EEF2K	16:22270148:22271783:+	-	-	-	0.19	0.5	0.35	0.17	0.35
Alternative 5' splice site	ENSG00000243716	NPIPL3	16:22524931:22525085:+	-	0.48	-	-	-	-	-	-
Alternative 5' splice site	ENSG00000166851	PLK1	16:23700070:23700559:+	-	-	-	0.11	-	-	-	-
Alternative 5' splice site	ENSG00000166851	PLK1	16:23701093:23701181:+	-	-	-	0.18	0.34	-	0.14	-
Alternative 5' splice site	ENSG00000007392	LUC7L	16:239338:239930:-	-	-	-	-	-	0.16	0.27	-
Alternative 5' splice site	ENSG00000007392	LUC7L	16:239338:239930:-	-	-	-	-	-	0.17	0.29	-
Alternative 5' splice site	ENSG00000205629	LCMT1	16:25139891:25143723:+	-	-	-	0.13	-	-	-	-
Alternative 5' splice site	ENSG00000077238	IL4R	16:27370321:27372087:+	-	-	-	-	-	-	-0.16	-0.13
Alternative 5' splice site	ENSG00000077235	GTF3C1	16:27474913:27475641:-	-	-0.11	-	-	0.25	-	0.33	0.17
Alternative 5' splice site	ENSG00000188603	CLN3	16:28497811:28497895:-	-	-	-	-	0.15	-	-	-
Alternative 5' splice site	ENSG00000168488	ATXN2L	16:28847497:28847647:+	-	-	-	-	0.59	-	0.35	0.48
Alternative 5' splice site	ENSG00000168488	ATXN2L	16:28847497:28848072:+	-	-	0.29	-	0.46	-	-	-
Alternative 5' splice site	ENSG00000168488	ATXN2L	16:28847806:28848049:+	-	-	-	-	-	-	0.21	-
Alternative 5' splice site	ENSG00000168488	ATXN2L	16:28847811:28848072:+	-	-	-	-	-	-	0.25	-
Alternative 5' splice site	ENSG00000178188	SH2B1	16:28884079:28884491:+	-	-	0.3	-	-	-	-	-
Alternative 5' splice site	ENSG00000178188	SH2B1	16:28884079:28884768:+	-	-	-	-	-	-0.19	-	-
Alternative 5' splice site	ENSG00000162076	FLYWCH2	16:2933367:2945221:+	-	-	-	-	-	-0.32	-	-
Alternative 5' splice site	ENSG00000213648	SULT1A4	16:29473084:29473174:+	-0.32	-	-	-	-0.12	-	-	-
Alternative 5' splice site	ENSG00000149923	PPP4C	16:30087421:30087636:+	-0.17	-0.14	-	-0.13	-	-	-	-
Alternative 5' splice site	ENSG00000149923	PPP4C	16:30094284:30094715:+	-	-	-	-	-	0.25	0.21	-
Alternative 5' splice site	ENSG00000090238	YPEL3	16:30106218:30106319:-	-	-	0.26	0.35	-	-	-	-
Alternative 5' splice site	ENSG00000090238	YPEL3	16:30106218:30106319:-	-	-	0.26	0.37	-	-	-	-
Alternative 5' splice site	ENSG00000102886	GDPD3	16:30119585:30119689:-	-	-0.15	-0.13	-	-	-	-	-
Alternative 5' splice site	ENSG00000127564	PKMYT1	16:3023216:3023997:-	-	0.17	-	-	-	-	-	-
Alternative 5' splice site	ENSG00000099377	HSD3B7	16:30997268:30997370:+	-	-	-	-	0.15	0.16	-	-
Alternative 5' splice site	ENSG00000008517	IL32	16:3117614:3117985:+	-	-	-	-	-0.18	-	-	-
Alternative 5' splice site	ENSG00000089280	FUS	16:31195717:31196260:+	-	-	-	-	-	-	-	0.13
Alternative 5' splice site	ENSG00000122390	NAA60	16:3535083:3535467:+	-	-	0.26	-	0.28	0.13	0.29	0.14
Alternative 5' splice site	ENSG00000103126	AXIN1	16:360069:364539:-	-	-	-0.11	-	-	-	-0.14	-
Alternative 5' splice site	ENSG00000162104	ADCY9	16:4042364:4043350:-	-	-	-	-	0.19	-	-	0.16
Alternative 5' splice site	ENSG00000153406	NMRAL1	16:4511960:4513643:-	-	-	-	-	0.11	0.13	-	-
Alternative 5' splice site	ENSG00000089486	CDIP1	16:4562684:4562788:-	-	-	-	-	-	0.13	0.14	-
Alternative 5' splice site	ENSG00000242612	DECR2	16:460404:460691:+	-	-	-	-	-0.19	-	-0.19	-0.24
Alternative 5' splice site	ENSG00000069329	VPS35	16:46694563:46695626:-	-	-	-	-	-	0.15	0.19	-
Alternative 5' splice site	ENSG00000168101	NUDT16L1	16:4744309:4744959:+	-	-	-	-	-0.11	-	-	-
Alternative 5' splice site	ENSG00000267795	RP11-127I20.4	16:4846049:4846191:+	0.23	-	0.16	-	-	-	-	-
Alternative 5' splice site	ENSG00000103174	NAGPA	16:5081885:5083274:-	-	-	-	-	-	-	-	0.22
Alternative 5' splice site	ENSG00000166971	AKTIP	16:53532508:53534126:-	-	-	-	0.17	-	-	-	-
Alternative 5' splice site	ENSG00000102934	PLLP	16:57290941:57292370:-	-	-	-	-	-	-	0.13	-
Alternative 5' splice site	ENSG00000205336	GPR56	16:57684267:57685112:+	-	-	-	-	-	-	-	0.16
Alternative 5' splice site	ENSG00000125107	CNOT1	16:58564251:58565860:-	-	-	-	-	-0.19	-0.21	-	-0.23
Alternative 5' splice site	ENSG00000125107	CNOT1	16:58568299:58570872:-	0.12	-	-	-	0.12	0.14	-	0.13
Alternative 5' splice site	ENSG00000125107	CNOT1	16:58589812:58590751:-	-	-	-	-	-	-0.22	-0.16	-
Alternative 5' splice site	ENSG00000067955	CBFB	16:67116242:67132613:+	-	-	-	-	0.27	-	-	-
Alternative 5' splice site	ENSG00000168701	TMEM208	16:67262560:67262700:+	-	0.13	-	-	-0.12	-	-0.15	-0.13
Alternative 5' splice site	ENSG00000168701	TMEM208	16:67262560:67262700:+	-	0.14	-	-	-0.12	-	-0.15	-0.13
Alternative 5' splice site	ENSG00000102977	ACD	16:67693516:67693605:-	-	-	-	-	-0.13	-	-	-0.2
Alternative 5' splice site	ENSG00000205220	PSMB10	16:67968851:67969199:-	-	-	-	-	-0.17	-	-0.11	-
Alternative 5' splice site	ENSG00000161996	WDR90	16:710870:711051:+	-	-	-	-	0.26	0.21	-	-
Alternative 5' splice site	ENSG00000161996	WDR90	16:713064:715679:+	0.34	-	-	-	-	-	0.28	-
Alternative 5' splice site	ENSG00000166747	AP1G1	16:71823385:71841704:-	-	-	-	-	-	-	0.82	-
Alternative 5' splice site	ENSG00000182149	IST1	16:71957287:71958672:+	-	-	-	0.14	-	-	-	-
Alternative 5' splice site	ENSG00000103266	STUB1	16:731689:731793:+	-	-	-	0.13	0.12	0.17	-	-
Alternative 5' splice site	ENSG00000103266	STUB1	16:731903:732020:+	-	-	-	-	-	0.14	-	-
Alternative 5' splice site	ENSG00000103266	STUB1	16:731903:732020:+	-	-	-	-	-	0.14	-	-
Alternative 5' splice site	ENSG00000205084	TMEM231	16:75575353:75576453:-	-	-	-	-	0.24	-	-	-
Alternative 5' splice site	ENSG00000205084	TMEM231	16:75575353:75576453:-	-	-	-	-	0.28	0.15	-	-
Alternative 5' splice site	ENSG00000103245	NARFL	16:787329:789540:-	0.15	-	0.16	0.34	0.29	0.11	0.35	-
Alternative 5' splice site	ENSG00000007376	RPUSD1	16:836928:837068:-	-	0.21	-	-	-	-	-	-
Alternative 5' splice site	ENSG00000104731	KLHDC4	16:87760530:87764154:-	-	0.13	0.14	0.12	-	-0.11	-	-
Alternative 5' splice site	ENSG00000104731	KLHDC4	16:87788898:87790005:-	-	-	-	-	0.14	-	0.15	0.15
Alternative 5' splice site	ENSG00000197912	SPG7	16:89598478:89598871:+	-	-	0.11	-	-	-	-	-
Alternative 5' splice site	ENSG00000131165	CHMP1A	16:89713122:89713443:-	-	-	-	0.15	-	-	0.18	-
Alternative 5' splice site	ENSG00000187741	FANCA	16:89805382:89805537:-	-	-	-	-	0.15	-	-	-
Alternative 5' splice site	ENSG00000187741	FANCA	16:89833645:89836116:-	-	-	-	-	-	0.23	0.49	0.22
Alternative 5' splice site	ENSG00000187741	FANCA	16:89862426:89865359:-	-	-	-	-	0.47	-	-	0.42
Alternative 5' splice site	ENSG00000187555	USP7	16:8989598:8990852:-	-	-	0.17	-	-	-	-0.13	-
Alternative 5' splice site	ENSG00000187555	USP7	16:8994914:8994995:-	-	-	-	0.12	-	-	-	-
Alternative 5' splice site	ENSG00000223959	AFG3L1P	16:90048331:90050939:+	-0.12	-	-	-	-	-	-	-
Alternative 5' splice site	ENSG00000223959	AFG3L1P	16:90051025:90055260:+	0.26	0.22	-	-	-	-	-	-
Alternative 5' splice site	ENSG00000006744	ELAC2	17:12897148:12897729:-	-	-	-	-	0.12	-	-	-
Alternative 5' splice site	ENSG00000167193	CRK	17:1326944:1339914:-	-	-	-	-	0.32	0.19	0.34	-
Alternative 5' splice site	ENSG00000132376	INPP5K	17:1411520:1412462:-	-	-0.24	-	-	0.21	0.12	-	-
Alternative 5' splice site	ENSG00000167703	SLC43A2	17:1486630:1489127:-	-	-	-	-	0.17	-	-	-
Alternative 5' splice site	ENSG00000011295	TTC19	17:15903696:15905229:+	-	0.12	-	0.15	-	-	-	-
Alternative 5' splice site	ENSG00000011295	TTC19	17:15903696:15905229:+	-	-	-	0.16	-	-	-	-
Alternative 5' splice site	ENSG00000154803	FLCN	17:17129636:17131197:-	-	-	-	-	-	-	0.15	-
Alternative 5' splice site	ENSG00000133027	PEMT	17:17480341:17494845:-	-	-	-0.37	-	-	-	-	-
Alternative 5' splice site	ENSG00000072310	SREBF1	17:17718061:17718145:-	-	0.15	0.18	-	-0.16	-	-	-
Alternative 5' splice site	ENSG00000072310	SREBF1	17:17720771:17720862:-	-	-	-	-	-	0.13	-	-
Alternative 5' splice site	ENSG00000072310	SREBF1	17:17722768:17722852:-	-	-	-	-	-	-	-0.16	-
Alternative 5' splice site	ENSG00000171953	ATPAF2	17:17924552:17925055:-	-	-	-	-	-	-0.27	-	-
Alternative 5' splice site	ENSG00000131899	LLGL1	17:18145315:18145480:+	-	-	0.12	-	-	-	-	-
Alternative 5' splice site	ENSG00000108963	DPH1	17:1939980:1940129:+	-	-	-	-	-0.15	-	-	-
Alternative 5' splice site	ENSG00000128487	SPECC1	17:20135727:20140173:+	-	-	-	-	-	-	-	-0.17
Alternative 5' splice site	ENSG00000109016	DHRS7B	17:21092176:21094261:+	-	-	-0.12	-	-	-	-	-
Alternative 5' splice site	ENSG00000109046	WSB1	17:25636302:25637087:+	0.15	0.16	0.13	0.19	-	-	-	0.17
Alternative 5' splice site	ENSG00000244045	TMEM199	17:26687599:26687758:+	-	-	-	-	-	0.23	0.17	-
Alternative 5' splice site	ENSG00000109111	SUPT6H	17:27018083:27020714:+	-	-	-	-0.12	-	0.17	0.13	-
Alternative 5' splice site	ENSG00000076604	TRAF4	17:27074409:27074861:+	0.22	-	0.55	0.54	0.4	0.15	0.65	0.28
Alternative 5' splice site	ENSG00000108578	BLMH	17:28616500:28618198:-	-	-	0.19	0.16	-	-	-	-
Alternative 5' splice site	ENSG00000108578	BLMH	17:28616500:28618198:-	-	-	0.15	0.12	-	-	-	-
Alternative 5' splice site	ENSG00000108587	GOSR1	17:28808281:28811232:+	-	0.21	0.22	0.41	0.28	-	-	-
Alternative 5' splice site	ENSG00000214719	AC005562.1	17:28959117:28960116:+	-	-	-	-	-	0.14	0.35	-
Alternative 5' splice site	ENSG00000141140	MYO19	17:34863763:34864736:-	-	-	-	-	-	-	-	-0.12
Alternative 5' splice site	ENSG00000005955	GGNBP2	17:34934622:34935675:+	-	-	-	-	0.16	-	-	-
Alternative 5' splice site	ENSG00000127774	EMC6	17:3572306:3572392:+	0.21	-	0.24	0.2	0.47	-	0.35	-
Alternative 5' splice site	ENSG00000108264	TADA2A	17:35798023:35800606:+	-	-	-	-	-	-	-	-0.21
Alternative 5' splice site	ENSG00000108264	TADA2A	17:35798059:35800606:+	-	-	-	-	-	-	-	-0.24
Alternative 5' splice site	ENSG00000185128	TBC1D3F	17:36292720:36292898:+	-	-	-	-	-	-	0.41	-
Alternative 5' splice site	ENSG00000174093	RP11-1407O15.2	17:36358395:36358797:-	-	-	-	-	0.25	0.13	0.33	-
Alternative 5' splice site	ENSG00000174093	RP11-1407O15.2	17:36361804:36365055:-	-	-	-	-	0.31	-	0.4	-
Alternative 5' splice site	ENSG00000108296	CWC25	17:36966018:36966529:-	-	-	-	-	-	-0.12	-	-
Alternative 5' splice site	ENSG00000125686	MED1	17:37596930:37599712:-	-	-	-	-	-	0.11	-	-
Alternative 5' splice site	ENSG00000131748	STARD3	17:37814105:37814226:+	-	-	-	-0.16	-	-	-	-
Alternative 5' splice site	ENSG00000141698	NT5C3B	17:39991524:39991840:-	-	-	-	0.12	-	-	-	-
Alternative 5' splice site	ENSG00000033627	ATP6V0A1	17:40653326:40659538:+	-	0.15	-	0.14	-	-	0.2	-
Alternative 5' splice site	ENSG00000131470	PSMC3IP	17:40725641:40725837:-	-	-	-	-	-	-	0.25	-
Alternative 5' splice site	ENSG00000131470	PSMC3IP	17:40726228:40729098:-	-	-	-	-	0.32	0.11	0.3	-
Alternative 5' splice site	ENSG00000037042	TUBG2	17:40812380:40812657:+	0.21	-	0.17	-	0.24	0.19	-	-
Alternative 5' splice site	ENSG00000068137	PLEKHH3	17:40821639:40821936:-	-	-	-	-	0.16	-	-	-
Alternative 5' splice site	ENSG00000126581	BECN1	17:40972859:40975723:-	-	-	-	-	0.16	-	0.15	-
Alternative 5' splice site	ENSG00000131480	AOC2	17:41001388:41001618:+	-	-	-	-	-	-	0.12	-
Alternative 5' splice site	ENSG00000068079	IFI35	17:41165396:41165493:+	-	-	-	-0.17	0.2	-	-	-
Alternative 5' splice site	ENSG00000141349	G6PC3	17:42148610:42151528:+	-	-	-0.11	-	-	-	-	-
Alternative 5' splice site	ENSG00000168591	TMUB2	17:42266956:42267869:+	-	-	-	-	-0.24	-	-0.18	-
Alternative 5' splice site	ENSG00000168591	TMUB2	17:42266956:42267869:+	-	-	-	-	-0.22	-	-0.15	-
Alternative 5' splice site	ENSG00000214447	FAM187A	17:42979024:42979733:+	-	-	-	-	0.33	-	-	-
Alternative 5' splice site	ENSG00000184922	FMNL1	17:43309847:43310591:+	-	-	-	-	-0.17	-	-	-
Alternative 5' splice site	ENSG00000159314	ARHGAP27	17:43482047:43482290:-	-	-	-	-0.15	-0.22	-	-	-
Alternative 5' splice site	ENSG00000141456	PELP1	17:4579179:4579329:-	-	-	0.15	-	-	-	-	-
Alternative 5' splice site	ENSG00000141295	SCRN2	17:45915368:45915636:-	-	-	-	-	-0.11	-	-	-
Alternative 5' splice site	ENSG00000108465	CDK5RAP3	17:46053019:46053235:+	-	-	0.11	-	-	-	-	-
Alternative 5' splice site	ENSG00000002919	SNX11	17:46189473:46189936:+	-	-	-	0.35	0.21	-	0.41	0.31
Alternative 5' splice site	ENSG00000167107	ACSF2	17:48539678:48539781:+	-	-	-	-	-	-	0.12	-
Alternative 5' splice site	ENSG00000108515	ENO3	17:4854519:4855123:+	-	-	-	-	-	-	0.22	0.2
Alternative 5' splice site	ENSG00000006282	SPATA20	17:48628583:48628872:+	-	-	-	-	-0.16	-	-0.16	-0.16
Alternative 5' splice site	ENSG00000108846	ABCC3	17:48735907:48736598:+	0.14	-	-	-	-	-	-	-
Alternative 5' splice site	ENSG00000136450	SRSF1	17:56082402:56082759:-	-0.12	-	-	-	-	0.12	0.18	0.16
Alternative 5' splice site	ENSG00000136450	SRSF1	17:56083888:56084268:-	-	-	0.11	-	-	-	0.11	-
Alternative 5' splice site	ENSG00000108384	RAD51C	17:56771172:56772292:+	-	-	0.77	0.6	-	-	-	-
Alternative 5' splice site	ENSG00000182628	SKA2	17:57189706:57196660:-	-	-	-	-	0.14	-	-	-
Alternative 5' splice site	ENSG00000182628	SKA2	17:57208728:57232317:-	0.2	-	-	-	-	-	-	-
Alternative 5' splice site	ENSG00000261040	CTD-2319I12.1	17:58161127:58162416:-	-	-	-	-	-	0.16	0.14	0.16
Alternative 5' splice site	ENSG00000198909	MAP3K3	17:61762950:61765887:+	-	0.19	-	-	-	0.22	-	-
Alternative 5' splice site	ENSG00000214176	PLEKHM1P	17:62797035:62800944:-	-0.16	-0.19	-	-	-	-	-	-
Alternative 5' splice site	ENSG00000171634	BPTF	17:65942441:65943842:+	0.15	0.18	0.21	0.33	-	-	0.28	-
Alternative 5' splice site	ENSG00000186665	C17orf58	17:65988219:65989017:-	-	-	-	0.19	-	-	-	-
Alternative 5' splice site	ENSG00000219200	RNASEK	17:6916854:6916985:+	-	-	-	-	-	-	0.19	-
Alternative 5' splice site	ENSG00000132535	DLG4	17:7107571:7111394:-	-	-	-	-	0.35	-	-	0.22
Alternative 5' splice site	ENSG00000004975	DVL2	17:7133262:7133365:-	-	-	-	-	-	-	0.15	-
Alternative 5' splice site	ENSG00000172809	RPL38	17:72199884:72200057:+	-	-	-	0.13	-	-	-	-
Alternative 5' splice site	ENSG00000215041	NEURL4	17:7227799:7228118:-	-	-	-0.17	-	-	-	-	-
Alternative 5' splice site	ENSG00000180901	KCTD2	17:73045429:73049109:+	0.15	0.11	-	-	-	-	-	-
Alternative 5' splice site	ENSG00000125458	NT5C	17:73126962:73127060:-	-	-	0.23	0.3	-0.35	-0.21	-	-0.19
Alternative 5' splice site	ENSG00000125458	NT5C	17:73126962:73127060:-	-	-	0.22	0.28	-0.34	-0.2	-	-0.18
Alternative 5' splice site	ENSG00000125450	NUP85	17:73228211:73228946:+	-	-	-	-	0.11	-	-	-
Alternative 5' splice site	ENSG00000125457	MIF4GD	17:73263048:73263532:-	0.12	-	0.11	-	0.33	-	0.24	0.15
Alternative 5' splice site	ENSG00000177728	KIAA0195	17:73487548:73487772:+	-	-	-0.22	-0.22	-	-	-	-
Alternative 5' splice site	ENSG00000177728	KIAA0195	17:73489213:73489572:+	-	0.18	-	-	-0.13	-	-0.21	-0.13
Alternative 5' splice site	ENSG00000073350	LLGL2	17:73566591:73567031:+	-	-	-	-	-	-	-	0.11
Alternative 5' splice site	ENSG00000161533	ACOX1	17:73952028:73953502:-	-	-	-	-	-	0.23	-	-
Alternative 5' splice site	ENSG00000161533	ACOX1	17:73974774:73974872:-	-	-	0.41	0.25	0.2	-	0.27	-
Alternative 5' splice site	ENSG00000176170	SPHK1	17:74381250:74381532:+	-	-	-	-	-	-0.11	-0.12	-
Alternative 5' splice site	ENSG00000175931	UBE2O	17:74396002:74396228:-	-0.21	-	-	-	-0.24	-	-	-
Alternative 5' splice site	ENSG00000161955	TNFSF13	17:7464189:7464316:+	-	-	-	-	-	-	0.14	-
Alternative 5' splice site	ENSG00000181038	METTL23	17:74723439:74729060:+	0.12	-	-	-	-	-	-	-
Alternative 5' splice site	ENSG00000092931	MFSD11	17:74734247:74734364:+	0.42	-	0.58	0.64	-	-	-	-
Alternative 5' splice site	ENSG00000141504	SAT2	17:7529932:7530025:-	-	-	-	0.16	-	-	0.14	-
Alternative 5' splice site	ENSG00000141504	SAT2	17:7530732:7530871:-	-	-	-	-	-	-	-	-0.14
Alternative 5' splice site	ENSG00000087157	PGS1	17:76415806:76420142:+	-	0.21	-	-	-	-	-	-
Alternative 5' splice site	ENSG00000055483	USP36	17:76831583:76832193:-	-	-	-	-	-	-	-0.17	-
Alternative 5' splice site	ENSG00000167280	ENGASE	17:77078959:77079102:+	-	-	-	-	0.22	-	0.12	-
Alternative 5' splice site	ENSG00000183011	LSMD1	17:7760161:7760303:-	0.11	-	-	-	0.15	-	-	-
Alternative 5' splice site	ENSG00000170004	CHD3	17:7812702:7813746:+	-	-	-	0.11	-	-	-	0.12
Alternative 5' splice site	ENSG00000173821	RNF213	17:78363171:78363628:+	-	-	-	0.21	-0.21	-	-	-
Alternative 5' splice site	ENSG00000170037	CNTROB	17:7851301:7851475:+	-	-	-	-	-	-	0.18	-
Alternative 5' splice site	ENSG00000170037	CNTROB	17:7852003:7852403:+	-	-	-	-	0.38	-	-	-
Alternative 5' splice site	ENSG00000176108	CHMP6	17:78970876:78971061:+	-	-	-	-	-	-	0.11	-
Alternative 5' splice site	ENSG00000141577	AZI1	17:79171688:79171906:-	-0.26	-	-0.2	-	-	-	-	0.18
Alternative 5' splice site	ENSG00000224877	C17orf89	17:79213743:79214787:+	-	-	0.13	0.11	-	-	-	-
Alternative 5' splice site	ENSG00000214087	ARL16	17:79649179:79649473:-	-	-	-	-	0.12	0.11	0.58	0.31
Alternative 5' splice site	ENSG00000185624	P4HB	17:79805223:79817055:-	-	-	-	-	-0.12	-0.19	-	-
Alternative 5' splice site	ENSG00000141552	ANAPC11	17:79849739:79852343:+	-	-	0.13	-	-	-	-	-
Alternative 5' splice site	ENSG00000187531	SIRT7	17:79872406:79872480:-	-	-	-	-	-	-	-	0.14
Alternative 5' splice site	ENSG00000187531	SIRT7	17:79873557:79875364:-	-	-	-	0.14	0.21	-	0.13	-
Alternative 5' splice site	ENSG00000183010	PYCR1	17:79892365:79892715:-	-	-	-	-	-	-	0.17	-
Alternative 5' splice site	ENSG00000169696	ASPSCR1	17:79974989:79975185:+	-	-	-0.28	-	-	-	-	-
Alternative 5' splice site	ENSG00000169689	STRA13	17:79977257:79977386:-	-	-	-	-	0.11	-	-	-
Alternative 5' splice site	ENSG00000169750	RAC3	17:79991479:79991575:+	-	-	-	-	-	-	-0.14	-
Alternative 5' splice site	ENSG00000169733	RFNG	17:80008640:80008888:-	0.17	-	0.46	0.4	0.2	-	-	0.22
Alternative 5' splice site	ENSG00000141551	CSNK1D	17:80202707:80203852:-	-	-	-	-	-	-	0.15	-
Alternative 5' splice site	ENSG00000181396	OGFOD3	17:80356195:80361771:-	-	-	-	-	-	0.15	-	-
Alternative 5' splice site	ENSG00000141560	FN3KRP	17:80680766:80684356:+	-	-	-	-	-	0.11	-	-
Alternative 5' splice site	ENSG00000178999	AURKB	17:8110206:8110488:-	-	-	-	0.11	-	-	-	-
Alternative 5' splice site	ENSG00000159842	ABR	17:960342:961084:-	-	-	-	-	-	-	0.11	-
Alternative 5' splice site	ENSG00000158201	ABHD3	18:19239304:19243639:-	-	-	-	-	0.2	-	-0.13	-
Alternative 5' splice site	ENSG00000101782	RIOK3	18:21053590:21054912:+	0.11	-	-	-	-	-	-	-
Alternative 5' splice site	ENSG00000141458	NPC1	18:21152144:21153412:-	-	-	-	-	0.15	0.19	-	-
Alternative 5' splice site	ENSG00000177426	TGIF1	18:3452380:3456352:+	-	-	0.13	0.11	-	-	-	-
Alternative 5' splice site	ENSG00000134030	CTIF	18:46284782:46287761:+	-	-	-	-	-	-	-	-0.23
Alternative 5' splice site	ENSG00000265681	RPL17	18:47017954:47018628:-	-	-	-	-	0.11	-	-	-
Alternative 5' splice site	ENSG00000167315	ACAA2	18:47317969:47318518:-	-	-	-	0.2	-0.21	-0.22	-0.19	-0.2
Alternative 5' splice site	ENSG00000154832	CXXC1	18:47810932:47811090:-	-	-	-	-	0.14	-	-	-
Alternative 5' splice site	ENSG00000154832	CXXC1	18:47811617:47812094:-	-	-	-	-	-	-	-	0.19
Alternative 5' splice site	ENSG00000066926	FECH	18:55240597:55247287:-	0.21	-	0.17	-	-	-	-	-
Alternative 5' splice site	ENSG00000141682	PMAIP1	18:57567946:57569879:+	-	-	-	-	0.24	-	0.63	-
Alternative 5' splice site	ENSG00000131196	NFATC1	18:77246937:77287528:+	0.3	0.27	-	-	-	-	-	-
Alternative 5' splice site	ENSG00000130816	DNMT1	19:10246963:10247752:-	-	-	-	-	0.26	0.16	-	0.13
Alternative 5' splice site	ENSG00000130816	DNMT1	19:10248685:10249111:-	0.13	-	-	0.12	-	-	-	-
Alternative 5' splice site	ENSG00000130734	ATG4D	19:10657791:10657865:+	-	-	-	-	-0.2	-	-	-
Alternative 5' splice site	ENSG00000129347	KRI1	19:10668571:10668644:-	-	-	-	-	-	-	0.18	-
Alternative 5' splice site	ENSG00000064932	SBNO2	19:1108703:1108778:-	-	-0.19	-	-	-	-	-	-
Alternative 5' splice site	ENSG00000197256	KANK2	19:11305266:11306232:-	-	-	-	-	-	0.23	-	-
Alternative 5' splice site	ENSG00000095066	HOOK2	19:12883858:12885375:-	0.11	-	0.23	0.33	-	-	-	-
Alternative 5' splice site	ENSG00000105607	GCDH	19:13002474:13002645:+	0.16	-	-	-	-	-	-0.13	-0.16
Alternative 5' splice site	ENSG00000104907	TRMT1	19:13223631:13223710:-	-0.2	-	-	-	-	-	-	-
Alternative 5' splice site	ENSG00000104907	TRMT1	19:13226280:13226920:-	-	-	-	-	0.35	-	0.32	-
Alternative 5' splice site	ENSG00000104907	TRMT1	19:13226866:13226950:-	-	-	-	-	-	-	0.14	-
Alternative 5' splice site	ENSG00000119559	C19orf25	19:1475257:1478653:-	0.16	-	0.47	0.43	0.27	-	0.4	0.18
Alternative 5' splice site	ENSG00000011243	AKAP8L	19:15508666:15509441:-	-	0.11	-	-	-	-	-	-
Alternative 5' splice site	ENSG00000127527	EPS15L1	19:16506278:16513126:-	-	0.12	-	-	-	0.16	-	-
Alternative 5' splice site	ENSG00000130511	SSBP4	19:18544027:18544395:+	-	-	-	0.18	0.19	-	-	-
Alternative 5' splice site	ENSG00000130511	SSBP4	19:18544742:18545027:+	-	-	-	-	-	-	-	0.11
Alternative 5' splice site	ENSG00000105655	ISYNA1	19:18545927:18546058:-	-	-	-	-	-	0.25	-	-
Alternative 5' splice site	ENSG00000105700	KXD1	19:18679499:18679640:+	-	-	-	-0.22	-0.19	-	-	-
Alternative 5' splice site	ENSG00000006016	CRLF1	19:18705244:18707432:-	-	-	0.15	-	-	-	-	-
Alternative 5' splice site	ENSG00000129968	FAM108A1	19:1877686:1878663:-	-	0.13	0.29	0.29	-	0.44	0.38	-
Alternative 5' splice site	ENSG00000064490	RFXANK	19:19308434:19308916:+	-	-	-	-	0.11	-	-	-
Alternative 5' splice site	ENSG00000129933	MAU2	19:19458175:19459698:+	-0.21	-	-0.2	-	-	-	-	-0.2
Alternative 5' splice site	ENSG00000105717	PBX4	19:19681108:19681395:-	-	-	-	-	0.25	-	-	-
Alternative 5' splice site	ENSG00000105726	ATP13A1	19:19766742:19766859:-	-	0.11	-	-	-	-0.12	-0.16	-0.13
Alternative 5' splice site	ENSG00000181896	ZNF101	19:19788799:19789535:+	-	-	-	-	-	-	-	-0.23
Alternative 5' splice site	ENSG00000099860	GADD45B	19:2476632:2477027:+	-	-	0.16	0.29	-	-	-	-
Alternative 5' splice site	ENSG00000261824	LINC00662	19:28223875:28236989:-	-	-	-	-	0.28	-	-	-
Alternative 5' splice site	ENSG00000105171	POP4	19:30099651:30101316:+	-	-	0.19	-	0.14	-	-	-
Alternative 5' splice site	ENSG00000105325	FZR1	19:3534520:3534793:+	-	-	-0.13	-	-	-	-	-
Alternative 5' splice site	ENSG00000161249	DMKN	19:35988440:35989500:-	-	0.16	-	-	-	-	-	-
Alternative 5' splice site	ENSG00000161249	DMKN	19:35988440:35989500:-	-	0.17	-	-	-	-	-	-
Alternative 5' splice site	ENSG00000161249	DMKN	19:35988583:35989500:-	0.23	0.3	0.24	-	-	-	-	-
Alternative 5' splice site	ENSG00000161249	DMKN	19:35990931:35991280:-	-	-0.13	-0.17	-	-	-	-	-
Alternative 5' splice site	ENSG00000249115	HAUS5	19:36105133:36105944:+	-	-	-	-	0.29	-	-	-
Alternative 5' splice site	ENSG00000161265	U2AF1L4	19:36234805:36234913:-	-	-0.15	-	-	-	-0.18	0.23	-
Alternative 5' splice site	ENSG00000105258	POLR2I	19:36604968:36605053:-	-	-	-	-	0.12	-	-	-
Alternative 5' splice site	ENSG00000188283	ZNF383	19:37726660:37726881:+	-	-	-	-	0.24	0.19	-	-
Alternative 5' splice site	ENSG00000007264	MATK	19:3779449:3779531:-	-	-	-	-	-0.15	-	-	-
Alternative 5' splice site	ENSG00000130669	PAK4	19:39658952:39660172:+	-	0.17	0.16	-	-	-	-	-
Alternative 5' splice site	ENSG00000128000	ZNF780B	19:40542533:40553282:-	-	-	-	-	0.22	0.18	-	-
Alternative 5' splice site	ENSG00000123815	ADCK4	19:41208598:41209274:-	-	-	-	-	-	-	-	-0.22
Alternative 5' splice site	ENSG00000077312	SNRPA	19:41269584:41270913:+	0.11	-	-	-	-	-	-	-
Alternative 5' splice site	ENSG00000160570	DEDD2	19:42713992:42719285:-	-	-	-	-	-0.19	-	-0.11	-
Alternative 5' splice site	ENSG00000079432	CIC	19:42798456:42798756:+	-	-	-	-	-	-	-	-0.12
Alternative 5' splice site	ENSG00000243137	PSG4	19:43702427:43708034:-	-	-	-	-	-	-	0.75	-
Alternative 5' splice site	ENSG00000104783	KCNN4	19:44278771:44280640:-	-	-	-	-	-	-	0.11	-
[truncated: 32,607 more rows]
