# Supplementary material for: RNA components of the spliceosome regulate tissue- and cancer-specific alternative splicing
Source: Genome Res. 2019 Oct;29(10):1591–604. doi: 10.1101/gr.246678.118 (PMC6771400; doi:10.1101/gr.246678.118)
Supplement: Supplemental Material [file supp_gr.246678.118_Supplemental_Table_S2.xlsx]

## Sheet: Sheet 1
Columns 5-8: Number of annotated alternative splicing events that can be detected (but not necessarily differentially spliced) per sample
Columns 9-10: Number of exons and introns that are annotated as being constitutively spliced and that can be detected (and potenitlaly differentially spliced despite their annotation) per sample
Cell line	Knock-down	N_mapped reads (M)	N_expressed genes (TPM>1)	N_detected alternative 5' splicing events	N_detected alternative 3' splicing events	N_detected annotated retained introns	N_detected annotated cassette exons	N_detected constitutive introns	N_detected constitutive exons
HeLa	Control	62.28	12245	10621	20105	5069	35386	101347	101352
HeLa	U1	64.58	11701	10300	19161	4851	34033	97132	97142
HeLa	U2	58.1	12065	10468	19463	5111	34757	96579	96585
HeLa	U4	61.82	11357	9929	17400	4966	32251	85908	85911
HeLa	U6	60.18	11027	10002	18132	4698	32532	92329	92338
MCF-7	Control	40.64	13149	10636	19921	5081	35973	104292	104294
MCF-7	U1	51.68	12791	10602	19966	5042	35715	103467	103475
MCF-7	U2	53.1	13243	10791	20267	5277	36748	104373	104373
MCF-7	U4	50.43	12372	10286	18615	4931	34263	96759	96762
MCF-7	U6	41.01	12786	10202	18188	4948	33992	94939	94939
