# Supplementary material for: RNA components of the spliceosome regulate tissue- and cancer-specific alternative splicing
Source: Genome Res. 2019 Oct;29(10):1591–604. doi: 10.1101/gr.246678.118 (PMC6771400; doi:10.1101/gr.246678.118)
Supplement: Supplemental Material [file supp_gr.246678.118_Supplemental_Table_S3.xlsx]

## Sheet: Sheet1
Chemically modified RNA-DNA hybrid oligos for snRNA knock-down. m, 2'-O-Methyl RNA bases. *, phosphorothioate bond. Bold, DNA bases.
Target	Sequence		Reference
Control	mC*mC*mA*mU*mG*G*C*T*A*A*C*C*A*C*A*mU*mU*mC*mU*mU
U1 snRNA	mC*mU*mC*mC*mC*C*T*G*C*C*A*G*G*T*A*mA*mG*mU*mA*mU		Liang et al. 2011; Vickers et al. 2011
U2 snRNA	mU*mG*mA*mU*mA*A*G*A*A*C*A*G*A*T*A*C*T*A*C*A*mC*mU*mU*mG*mA		Kaida et al. 2010
U4 snRNA	mG*mG*mG*mU*mA*T*T*G*G*G*A*A*A*A*G*mU*mU*mU*mU*mC		Modified from Vickers et al. 2011
U6 snRNA	mU*mG*mG*mA*mA*C*G*C*T*T*C*A*C*G*A*A*T*mU*mU*mG*mC*mG		Liang et al. 2011
Primers for real-time qPCR
Gene	ID	Forward primer	Reverse primer
RN7SK	ENSG00000202198	CATCCCCGATAGAGGAGGAC	CAAATGGACCTTGAGAGCTTG
RN7SL1	ENSG00000276168	CGGCATCAATATGGTGACCT	ATCAGCACGGGAGTTTTGAC
5S rRNA	ENSG00000199352	GCCATACCACCCTGAACG	AGCCTACAGCACCCGGTATT
RNU1-1	ENSG00000206652	ATACTTACCTGGCAGGGGAGA	GCAGTCGAGTTTCCCACATT
RNU2-1	ENSG00000274585	ATCGCTTCTCGGCCTTTT	TATTCCATCTCCCTGCTCCA
RNU4-1	ENSG00000200795	TGGCAGTATCGTAGCCAATG	CTGTCAAAAATTGCCAGTGC
RNU5A	ENSG00000199568	CTCTGGTTTCTCTTCAGATCGC	CAAGGCCTCAAAAAATTGGG
RNU6-1	ENSG00000206625	CGCTTCGGCAGCACATATAC	ATGGAACGCTTCACGAATTT
Primers for gel-based validation of alternative splicing
Gene	ID	Forward primer	Reverse primer
BECN1	ENSG00000126581	ACAGTGGACAGTTTGGCACA	CACTGCCTCCTGTGTCTTCA
PUM2	ENSG00000055917	AATTCAGCGCATCCTAGAGC	AAGGCACTGTGAGGACCATC
CHD2	ENSG00000173575	CAGCACATGGGAGAGTGAAG	AATAGGGGAGTCCCATCCAT
CHD8	ENSG00000100888	GACAAAGCAATTGCAGCAGA	CCACGTTCTGCAGCCTCTAT
SIKE1	ENSG00000052723	ATCCTGACAGACGCCAAGAC	AGTTCCAAAGCATCCTGGTG
KDM6B	ENSG00000132510	GCCAAGGTGAAAGGGAAGTT	TGGGATTTCGAGGGTCTGTA
ERMP1	ENSG00000099219	GGAACTGCAACTGTAGCCAAA	TGCTCTTGGCAAGGTAGATG
UBE2F	ENSG00000184182	AACTGAAGCGTGACGATGG	GTTGTACGCATCGGGAACTT
AEN	ENSG00000181026	AGGCGCTCAAGTATGTCCAC	TAGAGCTCCATGGCTGTCGT
FXR1	ENSG00000114416	CAGCTAAGAATGGAACGCCTA	TGTAATTAGGTCCCCGACGA
IFRD2	ENSG00000214706	CCATTGCACTGCTCTTTGAG	AAGCCGAAGCGCACTATCT
IFNL1	ENSG00000182393	CTAGACCAGCCCCTTCACAC	AAGGTGACAGATGCCTCCAG
EML3	ENSG00000149499	TCATTGATGGCAATGAGCAG	TGAAATTCCCATCCTTGGAC
PCGF1	ENSG00000115289	AGCCAGCACTGAGCAACC	CAGCGGGAGAGCCATATCT
