# Supplementary material for: RNA components of the spliceosome regulate tissue- and cancer-specific alternative splicing
Source: HighWire-hosted journal article supplement (doi:10.1101/gr.246678.118), 2019-08-21
Supplement: Supplemental_Fig_S4.pdf [file Supplemental_Fig_S4.pdf]

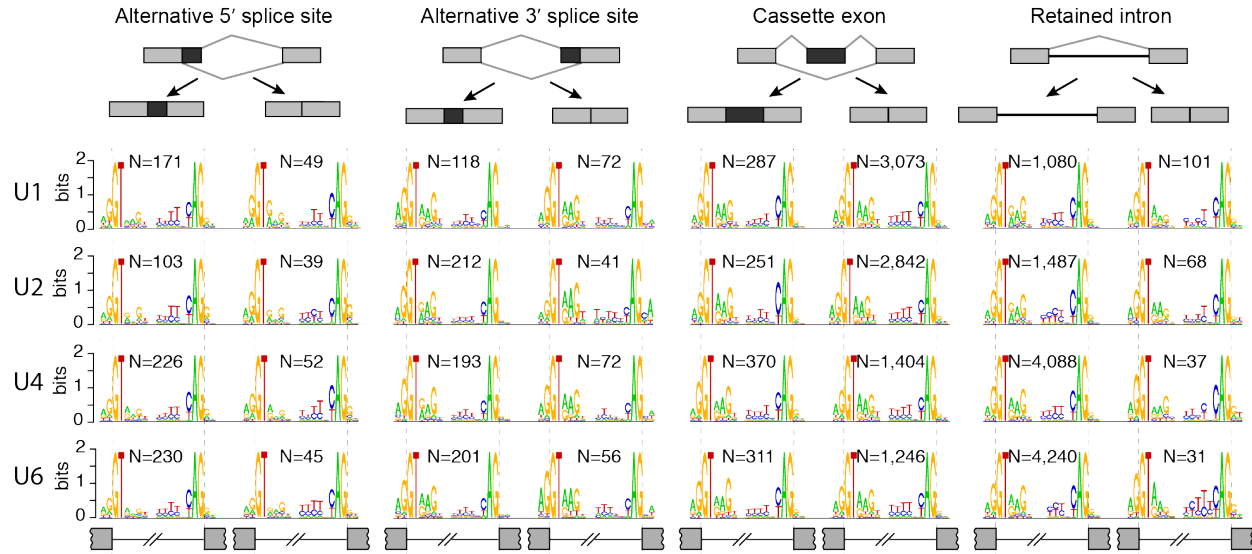

**Supplemental Figure S4:** Consensus 5' and 3' splice site sequences for all differentially spliced events in the individual snRNA knockdown versus control samples (MCF-7). Nucleotide heights correspond to their frequency across the differentially spliced events (N). Motifs are derived from the DNA gene sequence, using T instead of U. Grey boxes (*bottom*) indicates the location of the upstream and downstream exons, with the intervening intron truncated at the double slashes.
