# Supplementary material for: RNA components of the spliceosome regulate tissue- and cancer-specific alternative splicing
Source: HighWire-hosted journal article supplement (doi:10.1101/gr.246678.118), 2019-08-21
Supplement: Supplemental_Fig_S5.pdf [file Supplemental_Fig_S5.pdf]

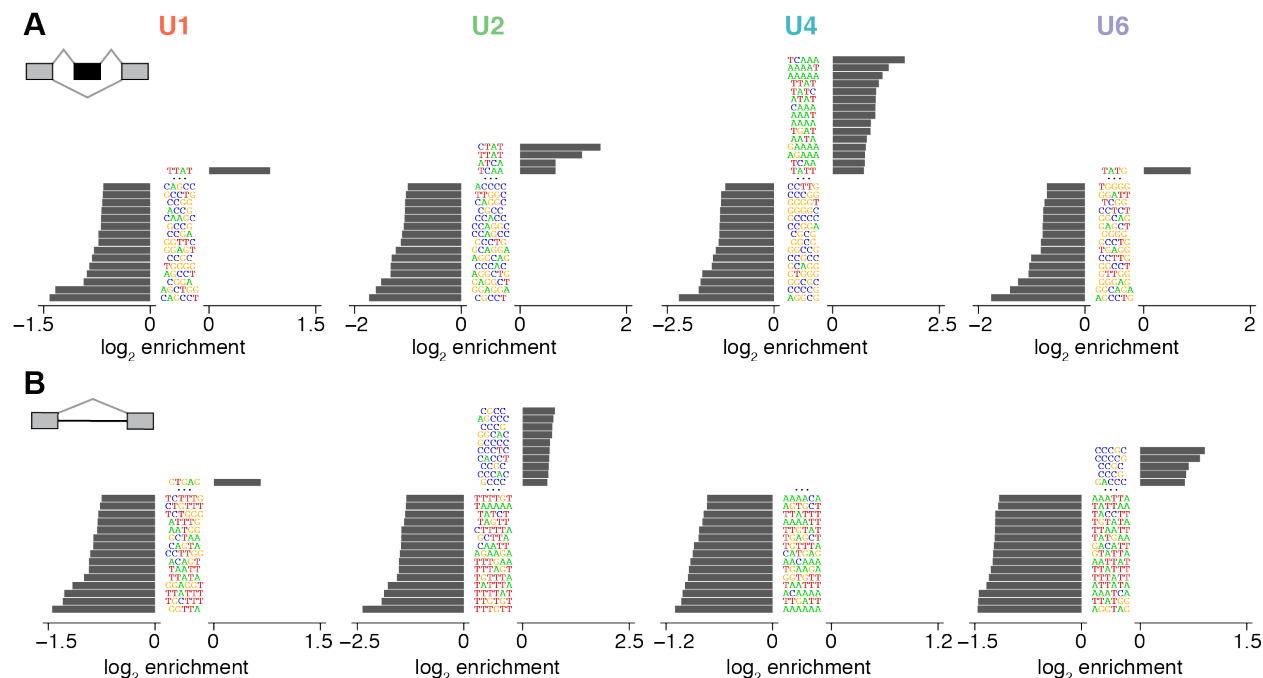

**Supplemental Figure S5:** Enrichment of sequence motifs in exons and introns affected by snRNA abundance.

Depleted (left) and enriched (right) motifs in (A) cassette exons that are differentially included versus excluded upon snRNA depletion and (B) introns that are retained versus un-affected introns.
